# Supplementary material for: Hypervalent iodine(iii)-induced oxidative [4+2] annulation of o-phenylenediamines and electron-deficient alkynes: direct synthesis of quinoxalines from alkyne substrates under metal-free conditions
Source: Royal Society of Chemistry journal article supplement (doi:10.1039/c3cc45469j), 2013-01-01
Supplement: c3cc45469j.pdf [file c3cc45469j.pdf]

*Electronic Supplementary Information (ESI) for*

**Hypervalent Iodine(III)-Induced Oxidative [4+2] Annulation of *o*-Phenylenediamines and Electron-Deficient Alkynes: Direct Synthesis of Quinoxalines from Alkyne Substrates under Metal-Free Conditions**

*Sota Okumura,<sup>†</sup> Youhei Takeda,<sup>\*†,‡</sup> Kensuke Kiyokawa,<sup>†</sup> and Satoshi Minakata<sup>\*†,‡</sup>*

<sup>†</sup>Department of Applied Chemistry and <sup>‡</sup>Frontier Research Base for Global Young Researchers  
Graduate School of Engineering, Osaka University, Yamadaoka 2-1, Suita, Osaka 565-0871, Japan

*e-mail:* [minakata@chem.eng.osaka-u.ac.jp](mailto:minakata@chem.eng.osaka-u.ac.jp); [takeda@chem.eng.osaka-u.ac.jp](mailto:takeda@chem.eng.osaka-u.ac.jp)

**Table of Contents**

|                                                               |         |
|---------------------------------------------------------------|---------|
| General remarks                                               | S2      |
| Procedures for the preparation of alkyne substrates           | S2–S3   |
| A typical procedure for the oxidative [4+2] annulation        | S3      |
| Procedure for the derivatization of <b>3a</b> into <b>6–8</b> | S4      |
| Procedure for the preparation of <b>9</b>                     | S4–S5   |
| Procedure for the reaction of <b>9</b> with PIDA              | S5      |
| Optimization study of reaction conditions (Table S1)          | S6      |
| The reaction of <b>9</b> with trifluoroacetic acid at –20 °C  | S6      |
| Explanation of Solvent Effect (Scheme S1)                     | S7      |
| Spectra data of products                                      | S8–S15  |
| <sup>1</sup> H and <sup>13</sup> C NMR charts of products     | S16–S67 |
| References                                                    | S68     |

## General remarks

Melting points were determined on a Stanford Research Systems MPA100 OptiMelt Automated Melting Point System and are uncorrected. Infrared spectra were recorded on a SHIMADZU IRAffinity-1 FT-IR Spectrometer.  $^1\text{H}$  and  $^{13}\text{C}$  NMR spectra were recorded on a JEOL JMT-400/54/SS spectrometer ( $^1\text{H}$  NMR, 400 MHz;  $^{13}\text{C}$  NMR, 100 MHz) using tetramethylsilane as an internal standard. Mass spectra were obtained on a JEOL JMS-DX303HF mass spectrometer. High-resolution mass spectra were obtained on a JEOL JMS-DX303HF mass spectrometer. Products were purified by chromatography on silica gel BW-300 (Fuji Silysia Chemical Ltd.). Analytical thin-layer chromatography (TLC) was performed on pre-coated silica gel glass plates (Merck silica gel 60 F<sub>254</sub>, 0.25 mm thickness). Compounds were visualized with UV lamp or treatment with an ethanolic solution of phosphomolybdic acid followed by heating. Dimethyl acetylenedicarboxylate (DMAD) was purchased and distilled before using. *o*-Phenylenediamines and  $\text{PhI}(\text{OAc})_2$  were purchased and used as received.

## Procedure for the preparation of alkyne **2b**<sup>S1</sup>

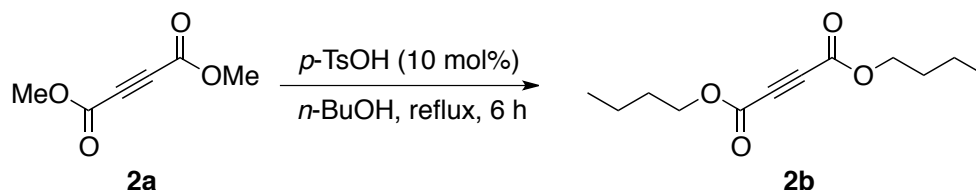

To a *n*-butyl alcohol solution (40 mL) of *p*-toluenesulfonic acid (2.5 mmol), was added dimethyl acetylenedicarboxylate (25 mmol) at room temperature. The mixture was stirred under reflux for 6 hour. *n*-Butyl alcohol was removed under vacuum to give the crude product. Purification by flash column chromatography on silica gel (eluent: ethyl acetate in hexane) gave alkyne **2b** (4.38 g, 77%).

## Procedure for the preparation of alkyne **2c**<sup>S3,S4</sup>

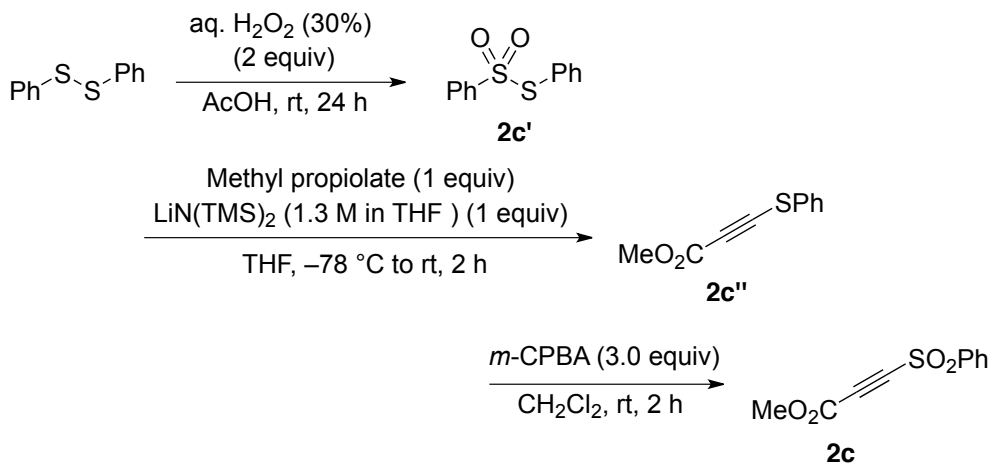

To a suspension of diphenyl disulfide (100 mmol) in acetic acid (80 mL), was dropwise added 30% aqueous hydrogen peroxide (200 mmol) over 30 min. After stirring at room temperature for 24 hour, the reaction mixture was cooled and filtered. Dilution of the filtrate with water (100 mL) caused phase-separation. The precipitates and oil layer were combined and dissolved in chloroform (100 mL). The solution was washed with aqueous sat.  $\text{NaHCO}_3$  (100mL), dried over  $\text{Na}_2\text{SO}_4$ , and concentrated under vacuum to give the crude product. Purification by flash column chromatography on silica gel (hexane/EtOAc 99:1 to 7:3) gave **2c'** (21.4 g, 86%). The spectroscopic data for **2c'** was in agreement with the reported data.<sup>S2</sup>

To a THF solution (32 mL) of methyl propiolate (16 mmol), was slowly added a solution of lithium bis(trimethylsilyl)amide (1.3 M in THF, 16 mmol) at  $-78^\circ\text{C}$ . After 30 min of stirring at  $-78^\circ\text{C}$ , a THF solution (24 mL) of **2c'** (16 mmol) was added dropwise at the same temperature, and the resulting mixture was left to react at room temperature for 2 hour. After the completion of the reaction, the reaction mixture was quenched with aqueous sat.  $\text{NH}_4\text{Cl}$  (30 mL) and extracted with  $\text{Et}_2\text{O}$  (50 mL  $\times$  3). The combined organic extracts was dried over  $\text{Na}_2\text{SO}_4$  and concentrated under vacuum to give the crude product **2c''**, which was used in the following step without further purification. To a  $\text{CH}_2\text{Cl}_2$  solution (45 mL) of **2c''**, was added a  $\text{CH}_2\text{Cl}_2$  solution (45 mL) of *m*-CPBA (70%, 48 mmol). The reaction mixture was stirred at room temperature for 2 hour and quenched with aqueous  $\text{Na}_2\text{S}_2\text{O}_3$  (1.0 M, 50 mL), and the resulting solution was extracted with  $\text{CH}_2\text{Cl}_2$  (50 mL  $\times$  3). The combined organic extracts was dried over  $\text{Na}_2\text{SO}_4$  and concentrated under vacuum to give the crude product. Purification by flash column chromatography on silica gel (eluent: ethyl acetate in hexane) gave alkyne **2c** (1.82 g, 50%).

#### A typical procedure for the oxidative [4+2] annulation

To a mixture of *o*-phenylenediamine (0.25 mmol) and alkyne (0.25 mmol) in DMF (3 mL), was added  $\text{PhI}(\text{OAc})_2$  (0.5 mmol, 161.0 mg) under  $\text{N}_2$  atmosphere at  $-20^\circ\text{C}$ . The mixture was stirred in the dark for 24 hour and quenched with aqueous  $\text{Na}_2\text{S}_2\text{O}_3$  (1.0 M, 5 mL), and the resulting solution was extracted with  $\text{CH}_2\text{Cl}_2$  (20 mL  $\times$  3). The combined organic extracts was washed with aqueous sat.  $\text{NaHCO}_3$  (10 mL), dried over  $\text{Na}_2\text{SO}_4$ , and concentrated under vacuum to give the crude product. Purification by flash column chromatography on silica gel (eluent: ethyl acetate in hexane) gave quinoxaline product (for example, compound **3a**: 56.6 mg, 92%).

### Procedure for the derivatization of **3a** into **6–8**

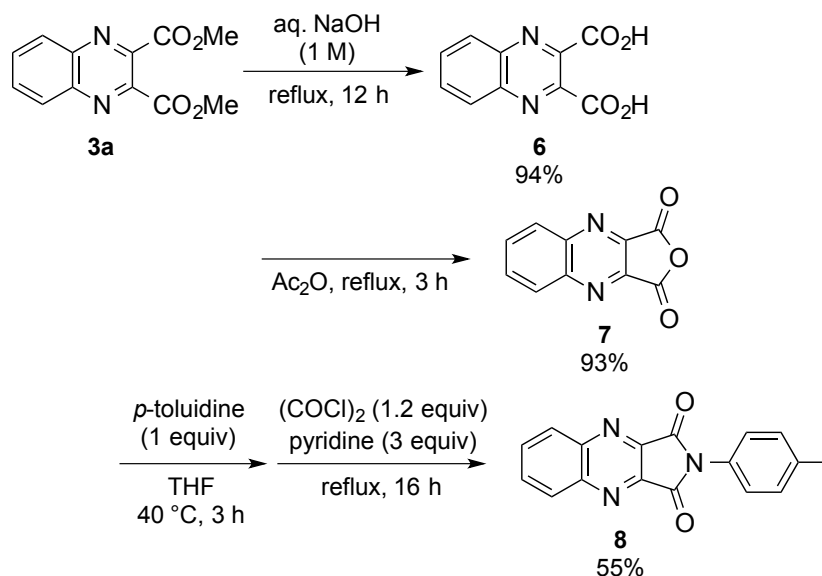

The mixture of quinoxaline **3a** (3 mmol) and aqueous NaOH (1 M, 45 mL) was stirred under reflux for 12 hour before quenched with aqueous HCl (2 M, 30 mL). The mixture was extracted with EtOAc/MeOH = 9/1 (v/v), dried over  $\text{Na}_2\text{SO}_4$ , and concentrated under vacuum to give the crude product, which was washed with  $\text{Et}_2\text{O}$  and  $\text{CHCl}_3$  to give **6** (614 mg, 94%).

Quinoxaline-2,3-dicarboxylic acid (**6**) (1 mmol) was dissolved in acetic anhydride (1 mL) and the solution was heated at reflux for 3 hour. The excess of acetic anhydride was distilled off. The crude was washed with water,  $\text{Et}_2\text{O}$  and  $\text{CHCl}_3$  to give **7** (186 mg, 93%).

A solution of **7** (0.25 mmol) and *p*-toluidine (0.25 mmol) in THF (3 mL) was heated to 40 °C for 3 hour. After cooling to room temperature, oxalyl chloride (0.3 mmol) and pyridine (0.75 mmol) were added, and the reaction mixture was stirred for 16 h under reflux. The solvent was evaporated to give the crude product. Purification by flash column chromatography on silica gel (eluent:  $\text{CH}_2\text{Cl}_2$ ) gave imide **8** (39.8 mg, 55%).

### Procedure for the preparation of **9**<sup>S5, S6</sup>

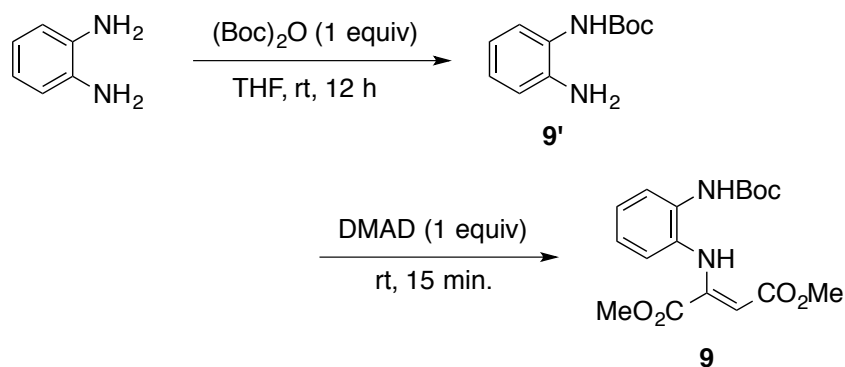



To a THF solution (15 mL) of *o*-phenylenediamine (100 mmol), was dropwise added di-*tert*-butyl dicarbonate (2 M in THF, 50 mL). The mixture was stirred at room temperature for 12 hour. After the mixture was concentrated under vacuum, the resulting residue was diluted with hexane/EtOAc = 4/1 (v/v), and the precipitate was removed thorough filtration. The resulting solution was concentrated to give the crude product. Purification by flash column chromatography on silica gel (eluent: ethyl acetate in hexane) gave *N*-Boc protected phenylenediamine product **9'** (10.8 g, 52%).

The mixture of **9'** (10 mmol) and dimethyl acetylenedicarboxylate (10 mmol) was stirred at room temperature for 15 min. Purification by flash column chromatography on silica gel (eluent: ethyl acetate in hexane) gave product **9** (2.2 g, 62%).

#### Procedure for the reaction of **9** with PIDA

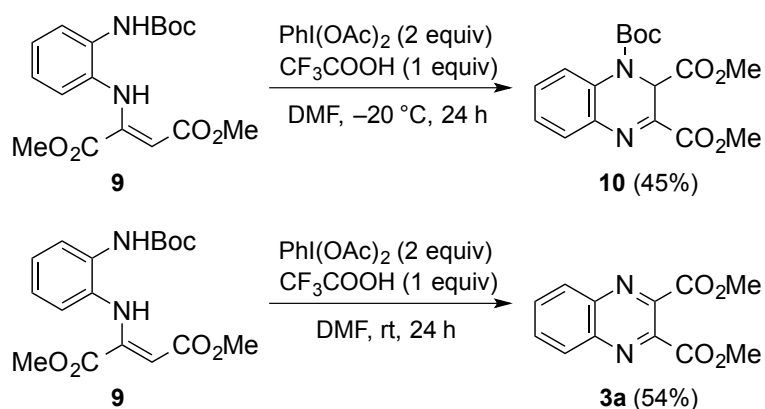

To a mixture of **9** (0.25 mmol) and trifluoroacetic acid (0.25 mmol) in DMF (3 mL), was added  $\text{PhI}(\text{OAc})_2$  (0.5 mmol, 161.0 mg) under  $\text{N}_2$  atmosphere at the temperature indicated. The mixture was stirred in the dark for 24 hour and quenched with aqueous  $\text{Na}_2\text{S}_2\text{O}_3$  (1.0 M, 5 mL), and the solution was extracted with  $\text{CH}_2\text{Cl}_2$  (20 mL  $\times$  3). The combined organic extracts was washed with aqueous sat.  $\text{NaHCO}_3$  (10 mL), dried over  $\text{Na}_2\text{SO}_4$ , and concentrated under vacuum to give the crude product. Purification by flash column chromatography on silica gel (eluent: ethyl acetate in hexane) gave **10** or **3a**.

**Table S1. Optimization study of reaction parameters**

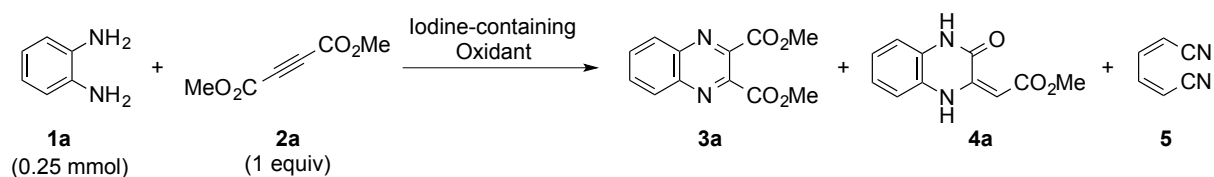

| entry | oxidant (equiv)           | solvent                         | temp. (°C) | time (h) | yield (%) <sup>a</sup> |                |       |
|-------|---------------------------|---------------------------------|------------|----------|------------------------|----------------|-------|
|       |                           |                                 |            |          | 3a                     | 4a             | 5     |
| 1     | <i>t</i> -BuOI (4)        | THF                             | −20        | 24       | 12                     | 0              | 64    |
| 2     | <i>t</i> -BuOI (4)        | DME                             | −20        | 24       | 2                      | 0              | 33    |
| 3     | PhI(OAc) <sub>2</sub> (2) | DME                             | −20        | 24       | 60 <sup>b</sup>        | 4 <sup>b</sup> | 0     |
| 4     | PhI(OAc) <sub>2</sub> (2) | MeCN                            | −20        | 24       | trace                  | 38             | 0     |
| 5     | PhI(OAc) <sub>2</sub> (2) | THF                             | −20        | 24       | 63                     | 18             | 0     |
| 6     | PhI(OAc) <sub>2</sub> (2) | DMF                             | −20        | 24       | 92 <sup>b</sup>        | 4 <sup>b</sup> | 0     |
| 7     | PhI(OAc) <sub>2</sub> (2) | CH <sub>2</sub> Cl <sub>2</sub> | −20        | 24       | trace                  | 40             | 0     |
| 8     | PhI(OAc) <sub>2</sub> (2) | toluene                         | −20        | 24       | 5                      | 36             | 0     |
| 9     | PhI(OAc) <sub>2</sub> (2) | Et <sub>2</sub> O               | −20        | 24       | 17                     | 24             | 0     |
| 10    | PhI(OAc) <sub>2</sub> (2) | DMF                             | 0          | 24       | 72                     | 10             | 0     |
| 11    | PhI(OAc) <sub>2</sub> (2) | DMF                             | 25         | 24       | 45                     | 28             | trace |
| 12    | PhI(OAc) <sub>2</sub> (2) | DMF                             | −40        | 24       | 82                     | 3              | 0     |
| 13    | PhI(OAc) <sub>2</sub> (2) | DMF                             | −20        | 1        | 46                     | trace          | 0     |
| 14    | PhI(OAc) <sub>2</sub> (2) | DMF                             | −20        | 3        | 65                     | trace          | 0     |
| 15    | PhI(OAc) <sub>2</sub> (2) | DMF                             | −20        | 6        | 71                     | trace          | 0     |
| 16    | PhI(OAc) <sub>2</sub> (2) | DMF                             | −20        | 12       | 84                     | trace          | 0     |

<sup>a</sup> <sup>1</sup>H NMR yields. <sup>b</sup> Isolated yield.

**The reaction of 9 with trifluoroacetic acid at −20 °C**

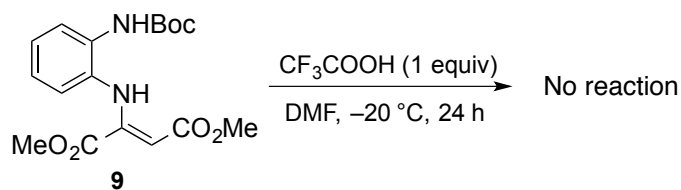

At −20 °C, **9** was not deprotected and starting material was recovered quantitatively (97%) in the presence of trifluoroacetic acid alone.

## Explanation of Solvent Effect

*Intramolecular* hydrogen-bond (H-bond) between enaminone N–H and conjugated carbonyl oxygen<sup>S8</sup> would be preferentially operative (**A-intra**) in non-polar solvents. However, in polar solvents such as DME and DMF, solvent molecules are capable of serving as a Lewis base to form *intermolecular* H-bond with enaminone N–H (**A-inter**). Such *intermolecular* H-bond would not only allow for free-rotation around the N–C single bond, but also enhance the anionic (nucleophilic) character of the  $\beta$ -carbon.<sup>S9</sup> Therefore, the solvent effect can be summarized as follows: non-polar solvents would favor the *intramolecular* H-bond that locks the enamine moiety into the 6-membered plane (**A-intra**), and thereby nucleophilic cyclization exclusively takes place at the carbonyl carbon to give **4a** as a major product. As the polarity of solvent increases, *intermolecular* H-bond would compete with *intramolecular* H-bond (**A-inter**), suppressing the production of **4a** and promoting electrophilic attack by PIDA on the nucleophilicity-enhanced  $\beta$ -carbon.

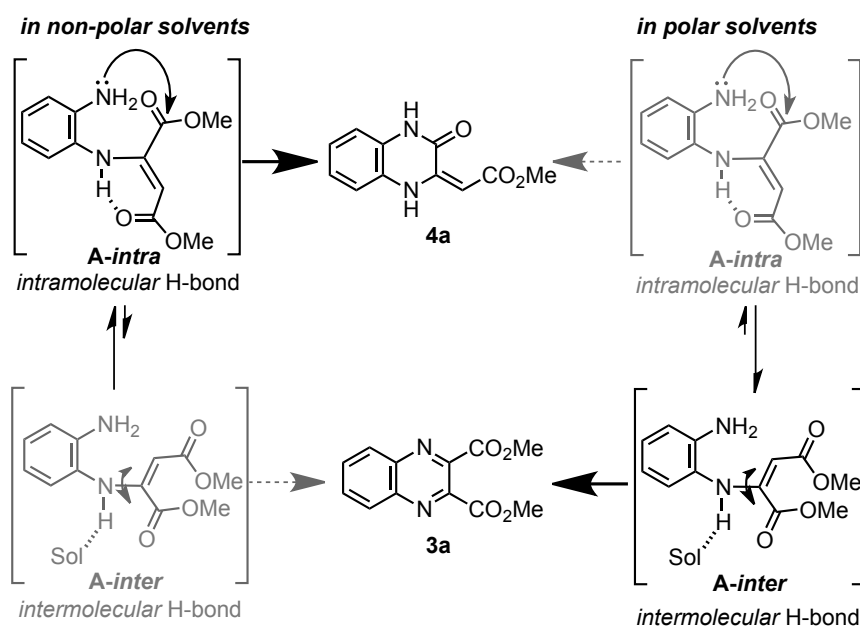

**Scheme S1** Illustrative Explanation of Solvent Effect in the Oxidative Annulation

## Spectra Data of Products

### Dibutyl acetylenedicarboxylate (2b)<sup>S1</sup>

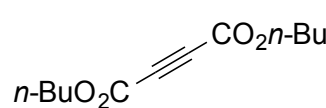 Purified by silica gel column chromatography (hexane/EtOAc 99:1 to 9:1); Colorless oil; *R*<sub>f</sub> 0.45 (hexane/EtOAc 9:1); <sup>1</sup>H NMR (400 MHz, CDCl<sub>3</sub>) δ 0.95 (t, *J* = 7.2 Hz, 6H), 1.41 (tq, *J* = 7.2, 7.6 Hz, 4H), 1.68 (tt, *J* = 6.8, 7.6 Hz, 4H), 4.25 (t, *J* = 6.8 Hz, 4H); <sup>13</sup>C NMR (100 MHz, CDCl<sub>3</sub>) δ 13.2, 18.6, 29.9, 66.4, 74.3, 151.5; IR (ATR) ν 2963, 1721, 1244, 1059, 1036, 746 cm<sup>-1</sup>; MS (CI): *m/z* (relative intensity, %) 227 ([M]<sup>+</sup> + H<sup>+</sup>, 100), 171 (25); HRMS (CI): *m/z* calcd for C<sub>12</sub>H<sub>10</sub>O<sub>4</sub> (M) 227.1283, found 227.1285.

### Methyl 2-(phenylsulfonyl)propiolate (2c)

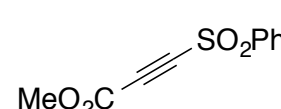 Purified by silica gel column chromatography (hexane/EtOAc 99:1 to 7:3); Yellow oil; *R*<sub>f</sub> 0.08 (hexane/EtOAc 9:1); <sup>1</sup>H NMR (400 MHz, CDCl<sub>3</sub>) δ 3.84 (s, 3H), 7.64 (m, 2H), 7.77 (m, 1H), 8.03 (m, 2 H); <sup>13</sup>C NMR (100 MHz, CDCl<sub>3</sub>) δ 53.8, 79.35, 79.42, 128.0, 129.7, 135.3, 139.6, 151.3; IR (ATR) ν 3066, 1724, 1448, 1435, 1348, 1242, 1165, 1086, 883, 742 cm<sup>-1</sup>; MS (EI): *m/z* (relative intensity, %) 224 ([M]<sup>+</sup>, 48), 193 (14), 125 (100), 77 (99); HRMS (EI): *m/z* calcd for C<sub>10</sub>H<sub>8</sub>O<sub>4</sub>S (M) 224.0143, found 224.0141.

### Dimethyl quinoxaline-2,3-dicarboxylate (3a)<sup>S7</sup>

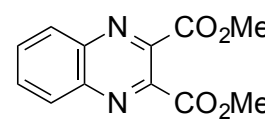 Purified by silica gel column chromatography (hexane/EtOAc 99:1 to 7:3); Yellow solid (56.6 mg, 92%); mp 132.6–133.0 °C; *R*<sub>f</sub> 0.20 (hexane/EtOAc 7:3); <sup>1</sup>H NMR (400 MHz, CDCl<sub>3</sub>) δ 4.11 (s, 6H), 7.96 (dd, *J* = 3.6, 6.8 Hz, 2H), 8.27 (dd, *J* = 3.6, 6.8 Hz, 2H); <sup>13</sup>C NMR (100 MHz, CDCl<sub>3</sub>) δ 53.6, 129.8, 132.7, 141.3, 143.7, 165.1; IR (ATR) ν 2954, 1718, 1442, 1325, 1290, 1228, 1193, 1166, 1114, 954, 852, 781, 767 cm<sup>-1</sup>; MS (EI): *m/z* (relative intensity, %) 246 ([M]<sup>+</sup>, 32), 215 ([M]<sup>+</sup> – OMe, 26), 188 ([M]<sup>+</sup> – CO<sub>2</sub>Me + H<sup>+</sup>, 31), 130 ([M]<sup>+</sup> – 2CO<sub>2</sub>Me + 2H<sup>+</sup>, 100); HRMS (EI): *m/z* calcd for C<sub>12</sub>H<sub>10</sub>N<sub>2</sub>O<sub>4</sub> (M) 246.0641, found 246.0639.

### Dimethyl 6-methylquinoxaline-2,3-dicarboxylate (3b)

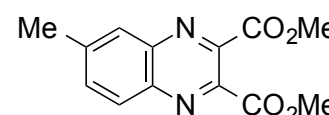 Purified by silica gel column chromatography (hexane/EtOAc 99:1 to 7:3); Yellow solid (55.4 mg, 85%); mp 84.4–85.4 °C; *R*<sub>f</sub> 0.18 (hexane/EtOAc 7:3); <sup>1</sup>H NMR (400 MHz, CDCl<sub>3</sub>) δ 2.65 (s, 3H), 4.09 (s, 6H), 7.77 (dd, *J* = 2.0, 8.8 Hz, 1H), 8.02 (s, 1H), 8.15 (d, *J* = 8.8 Hz, 1H); <sup>13</sup>C NMR (100 MHz, CDCl<sub>3</sub>) δ 22.0, 53.47, 53.53, 128.4, 129.3, 135.0, 135.1, 139.8, 141.5, 142.5, 144.0, 165.1, 165.3; IR (ATR) ν 2954, 1738, 1720, 1446, 1342, 1311, 1288, 1224, 1192, 1170, 1148, 1121, 1068, 858, 831, 810 cm<sup>-1</sup>; MS (EI): *m/z* (relative intensity, %) 260 ([M]<sup>+</sup>, 43),

229 ( $[M]^+ - \text{OMe}$ , 19), 202 ( $[M]^+ - \text{CO}_2\text{Me} + \text{H}^+$ , 23), 144 ( $[M]^+ - 2\text{CO}_2\text{Me} + 2\text{H}^+$ , 100); HRMS (EI):  $m/z$  calcd for  $\text{C}_{13}\text{H}_{12}\text{N}_2\text{O}_4$  (M) 260.0797, found 260.0800.

### Dimethyl 6-methoxyquinoxaline-2,3-dicarboxylate (3c)

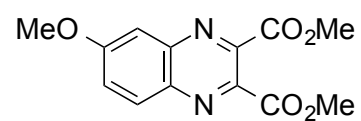 Purified by silica gel column chromatography (hexane/EtOAc 99:1 to 7:3); Yellow solid (66.8 mg, 97%); mp 113.3–113.7 °C;  $R_f$  0.18 (hexane/EtOAc 7:3);  $^1\text{H}$  NMR (400 MHz,  $\text{CDCl}_3$ )  $\delta$  4.00 (s, 3H), 4.084 (s, 3H), 4.089 (s, 3H), 7.49 (s, 1H), 7.57 (d,  $J = 9.6$  Hz, 1H), 8.13 (d,  $J = 9.6$  Hz, 1H);  $^{13}\text{C}$  NMR (100 MHz,  $\text{CDCl}_3$ )  $\delta$  53.49, 53.52, 56.1, 106.5, 126.6, 130.8, 137.7, 140.3, 143.5, 144.6, 163.1, 165.1, 165.6; IR (ATR)  $\nu$  296.1, 1739, 1726, 1616, 1491, 1450, 1440, 1413, 1287, 1222, 1198, 1182, 1121, 1067, 1018, 862, 837, 810  $\text{cm}^{-1}$ ; MS (EI):  $m/z$  (relative intensity, %) 276 ( $[M]^+$ , 41), 245 ( $[M]^+ - \text{OMe}$ , 12), 218 ( $[M]^+ - \text{CO}_2\text{Me} + \text{H}^+$ , 7), 160 ( $[M]^+ - 2\text{CO}_2\text{Me} + 2\text{H}^+$ , 100); HRMS (EI):  $m/z$  calcd for  $\text{C}_{13}\text{H}_{12}\text{N}_2\text{O}_5$  (M) 276.0746, found 276.0744.

### Dimethyl 6-fluoroquinoxaline-2,3-dicarboxylate (3d)

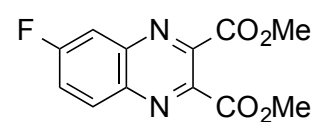 Purified by silica gel column chromatography (hexane/EtOAc 99:1 to 8:2); Yellow solid (62.3 mg, 94%); mp 88.3–89.0 °C;  $R_f$  0.15 (hexane/EtOAc 8:2);  $^1\text{H}$  NMR (400 MHz,  $\text{CDCl}_3$ )  $\delta$  4.101 (s, 3H), 4.105 (s, 3H), 7.74 (m, 1H), 7.88 (dd,  $J = 2.4, 9.2$  Hz, 1H), 8.29 (dd,  $J = 5.6, 9.2$  Hz, 1H);  $^{13}\text{C}$  NMR (100 MHz,  $\text{CDCl}_3$ )  $\delta$  53.6 (s), 53.8 (s), 113.3 (d,  $J = 22.2$  Hz), 123.4 (d,  $J = 26.3$  Hz), 132.3 (d,  $J = 10.7$  Hz), 138.6 (s), 142.5 (d,  $J = 14.0$  Hz), 142.7 (d,  $J = 2.3$  Hz), 145.0 (s), 164.3 (d,  $J = 257.7$  Hz), 164.8 (s), 165.0 (s); IR (ATR)  $\nu$  2953, 1715, 1721, 1449, 1298, 1200, 1179, 1115, 1064, 885, 856, 839, 826, 787  $\text{cm}^{-1}$ ; MS (EI):  $m/z$  (relative intensity, %) 264 ( $[M]^+$ , 37), 233 ( $[M]^+ - \text{OMe}$ , 35), 206 ( $[M]^+ - \text{CO}_2\text{Me} + \text{H}^+$ , 32), 148 ( $[M]^+ - 2\text{CO}_2\text{Me} + 2\text{H}^+$ , 100); HRMS (EI):  $m/z$  calcd for  $\text{C}_{12}\text{H}_9\text{FN}_2\text{O}_4$  (M) 264.0546, found 264.0545.

### Dimethyl 6-chloroquinoxaline-2,3-dicarboxylate (3e)

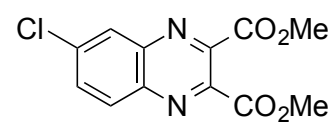 Purified by silica gel column chromatography (hexane/EtOAc 99:1 to 7:3); Yellow solid (60.8 mg, 87%); mp 93.5–94.4 °C;  $R_f$  0.28 (hexane/EtOAc 7:3);  $^1\text{H}$  NMR (400 MHz,  $\text{CDCl}_3$ )  $\delta$  4.10 (s, 6H), 7.88 (dd,  $J = 2.0, 8.8$  Hz, 1H), 8.20 (d,  $J = 8.8$  Hz, 1H), 8.25 (d,  $J = 2.0$  Hz, 1H);  $^{13}\text{C}$  NMR (100 MHz,  $\text{CDCl}_3$ )  $\delta$  53.70, 53.77, 128.6, 131.0, 133.8, 139.0, 139.8, 141.6, 143.5, 144.9, 164.7, 164.9; IR (ATR)  $\nu$  2956, 1736, 1721, 1443, 1289, 1279, 1234, 1220, 1153, 1124, 876, 856, 835, 816, 804  $\text{cm}^{-1}$ ; MS (EI):  $m/z$  (relative intensity, %) 280 ( $[M]^+$ , 40), 249 ( $[M]^+ - \text{OMe}$ , 31), 222 ( $[M]^+ - \text{CO}_2\text{Me} + \text{H}^+$ , 29), 164 ( $[M]^+ - 2\text{CO}_2\text{Me} + 2\text{H}^+$ , 100); HRMS (EI):  $m/z$  calcd for  $\text{C}_{12}\text{H}_9\text{ClN}_2\text{O}_4$  (M) 280.0250, found 280.0251.

### Dimethyl 6-bromoquinoxaline-2,3-dicarboxylate (3f)

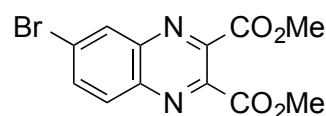 Purified by silica gel column chromatography (hexane/EtOAc 99:1 to 7:3); Yellow solid (69.0 mg, 85%); mp 99.6–100.3 °C;  $R_f$  0.20 (hexane/EtOAc 8:2);  $^1\text{H}$  NMR (400 MHz,  $\text{CDCl}_3$ )  $\delta$  4.10 (s, 6H), 8.02 (d,  $J$  = 8.8 Hz, 1H), 8.12 (d,  $J$  = 8.8 Hz, 1H), 8.44 (s, 1H);  $^{13}\text{C}$  NMR (100 MHz,  $\text{CDCl}_3$ )  $\delta$  53.7, 127.4, 131.0, 132.0, 136.3, 140.1, 141.8, 143.6, 144.8, 164.7, 164.8; IR (ATR)  $\nu$  2957, 1738, 1722, 1440, 1298, 1219, 1153, 1124, 1065, 813  $\text{cm}^{-1}$ ; MS (EI):  $m/z$  (relative intensity, %) 324 ( $[\text{M}]^+$ , 66), 293 ( $[\text{M}]^+ - \text{OMe}$ , 31), 266 ( $[\text{M}]^+ - \text{CO}_2\text{Me} + \text{H}^+$ , 52), 208 ( $[\text{M}]^+ - 2\text{CO}_2\text{Me} + 2\text{H}^+$ , 100); HRMS (EI):  $m/z$  calcd for  $\text{C}_{12}\text{H}_9\text{BrN}_2\text{O}_4$  (M) 323.9746, found 323.9749.

### Dimethyl 6-(trifluoromethyl)quinoxaline-2,3-dicarboxylate (3g)

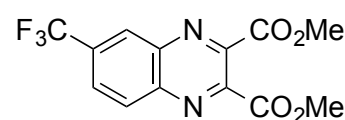 Purified by silica gel column chromatography (hexane/EtOAc 99:1 to 7:3); Orange solid (71.2 mg, 91%); mp 82.6–83.8 °C;  $R_f$  0.21 (hexane/EtOAc 8:2);  $^1\text{H}$  NMR (400 MHz,  $\text{CDCl}_3$ )  $\delta$  4.12 (s, 6H), 8.12 (d,  $J$  = 8.8 Hz, 1H), 8.40 (d,  $J$  = 8.8 Hz, 1H), 8.60 (s, 1H);  $^{13}\text{C}$  NMR (100 MHz,  $\text{CDCl}_3$ )  $\delta$  53.7 (s), 123.0 (q,  $J$  = 271.7 Hz), 127.7 (q,  $J$  = 4.9 Hz), 128.2 (q,  $J$  = 2.5 Hz), 131.1 (s), 134.0 (q,  $J$  = 32.9 Hz), 140.3 (s), 142.2 (s), 144.8 (s), 145.7 (s), 164.4 (s), 164.5 (s); IR (ATR)  $\nu$  2922, 1751, 1732, 1443, 1350, 1175, 1138, 1118, 1070, 1055, 902, 847  $\text{cm}^{-1}$ ; MS (EI):  $m/z$  (relative intensity, %) 314 ( $[\text{M}]^+$ , 34), 283 ( $[\text{M}]^+ - \text{OMe}$ , 32), 256 ( $[\text{M}]^+ - \text{CO}_2\text{Me} + \text{H}^+$ , 16), 198 ( $[\text{M}]^+ - 2\text{CO}_2\text{Me} + 2\text{H}^+$ , 100); HRMS (EI):  $m/z$  calcd for  $\text{C}_{13}\text{H}_9\text{F}_3\text{N}_2\text{O}_4$  (M) 314.0514, found 314.0512.

### Dimethyl 6-benzoylquinoxaline-2,3-dicarboxylate (3h)

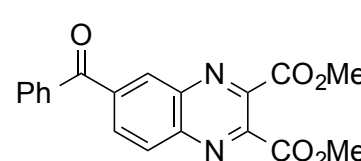 Purified by silica gel column chromatography (hexane/EtOAc 99:1 to 6:4); Yellow solid (69.6 mg, 80%); mp 119.2–120.0 °C;  $R_f$  0.10 (hexane/EtOAc 8:2);  $^1\text{H}$  NMR (400 MHz,  $\text{CDCl}_3$ )  $\delta$  4.10 (s, 3H), 4.12 (s, 3H), 7.54 (t,  $J$  = 8.0 Hz, 2H), 7.67 (m, 1H), 7.88 (dd,  $J$  = 1.2, 6.8 Hz, 2H), 8.38 (d,  $J$  = 8.8 Hz, 1H), 8.42 (d,  $J$  = 8.8 Hz, 1H), 8.59 (s, 1H);  $^{13}\text{C}$  NMR (100 MHz,  $\text{CDCl}_3$ )  $\delta$  53.8, 128.7, 130.1, 130.4, 132.4, 132.6, 133.3, 136.3, 140.5, 140.7, 142.9, 144.5, 145.5, 164.7, 164.9, 194.9; IR (ATR)  $\nu$  2976, 1740, 1726, 1659, 1445, 1296, 1229, 1150, 1117, 1065, 895, 849  $\text{cm}^{-1}$ ; MS (EI):  $m/z$  (relative intensity, %) 350 ( $[\text{M}]^+$ , 29), 319 ( $[\text{M}]^+ - \text{OMe}$ , 18), 292 ( $[\text{M}]^+ - \text{CO}_2\text{Me} + \text{H}^+$ , 8), 234 ( $[\text{M}]^+ - 2\text{CO}_2\text{Me} + 2\text{H}^+$ , 78), 105 (PhCO, 100); HRMS (EI):  $m/z$  calcd for  $\text{C}_{19}\text{H}_{14}\text{N}_2\text{O}_5$  (M) 350.0903, found 350.0905.

### 6-Ethyl 2,3-dimethyl quinoxaline-2,3,6-tricarboxylate (3i)

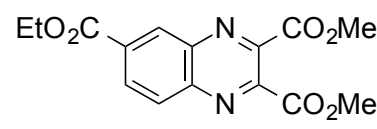 Purified by silica gel column chromatography (hexane/EtOAc 99:1 to 6:4); Yellow solid (75.6 mg, 95%); mp 112.8–113.4 °C;  $R_f$  0.10 (hexane/EtOAc 8:2);  $^1\text{H}$  NMR (400 MHz,  $\text{CDCl}_3$ )  $\delta$  1.46 (t,  $J$  = 7.2 Hz, 3H), 4.11 (s, 6H), 4.49 (q,  $J$  = 7.2 Hz, 2H), 8.31 (d,  $J$  = 8.8 Hz, 1H), 8.54 (d,  $J$  = 8.8 Hz, 1H), 8.99 (s, 1H);  $^{13}\text{C}$  NMR (100 MHz,  $\text{CDCl}_3$ )  $\delta$  14.1, 53.7, 61.9, 129.9, 132.08, 132.10, 134.0, 140.6, 143.0, 144.2, 145.4, 164.56, 164.77, 164.80; IR (ATR)  $\nu$  3001, 1751, 1719, 1443, 1342, 1294, 1231, 1146, 1120, 1169  $\text{cm}^{-1}$ ; MS (EI):  $m/z$  (relative intensity, %) 318 ( $[\text{M}]^+$ , 26), 287 ( $[\text{M}]^+ - \text{OMe}$ , 19), 273 ( $[\text{M}]^+ - \text{OEt}$ , 28), 260 ( $[\text{M}]^+ - \text{CO}_2\text{Me} + \text{H}^+$ , 16), 245 ( $[\text{M}]^+ - \text{CO}_2\text{Et}$ , 2), 202 ( $[\text{M}]^+ - 2\text{CO}_2\text{Me} + 2\text{H}^+$ , 100); HRMS (EI):  $m/z$  calcd for  $\text{C}_{15}\text{H}_{14}\text{N}_2\text{O}_6$  (M) 318.0852, found 318.0851.

### Dimethyl 6-cyanoquinoxaline-2,3-dicarboxylate (3j)

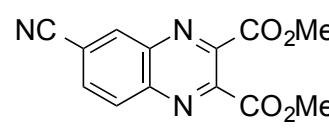 Purified by silica gel column chromatography (hexane/EtOAc 99:1 to 5:5); Yellow solid (60.2 mg, 89%); mp 128.5–129.1 °C;  $R_f$  0.20 (hexane/EtOAc 7:3);  $^1\text{H}$  NMR (400 MHz,  $\text{CDCl}_3$ )  $\delta$  4.12 (s, 6H), 8.10 (dd,  $J$  = 2.0, 8.8 Hz, 1H), 8.37 (d,  $J$  = 8.8 Hz, 1H), 8.63 (d,  $J$  = 2.0 Hz, 1H);  $^{13}\text{C}$  NMR (100 MHz,  $\text{CDCl}_3$ )  $\delta$  53.8, 116.1, 117.0, 131.4, 133.0, 135.4, 140.3, 142.4, 145.3, 145.9, 164.2, 164.2; IR (ATR)  $\nu$  2955, 2230, 1732, 1443, 1307, 1227, 1167, 1125, 1067, 849, 814  $\text{cm}^{-1}$ ; MS (EI):  $m/z$  (relative intensity, %) 271 ( $[\text{M}]^+$ , 47), 240 ( $[\text{M}]^+ - \text{OMe}$ , 54), 213 ( $[\text{M}]^+ - \text{CO}_2\text{Me} + \text{H}^+$ , 24), 155 ( $[\text{M}]^+ - 2\text{CO}_2\text{Me} + 2\text{H}^+$ , 100); HRMS (EI):  $m/z$  calcd for  $\text{C}_{13}\text{H}_9\text{N}_3\text{O}_4$  (M) 271.0593, found 271.0594.

### Dimethyl 6,7-dimethylquinoxaline-2,3-dicarboxylate (3k)

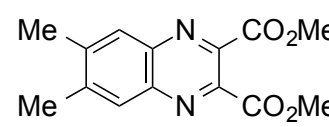 Purified by silica gel column chromatography (hexane/EtOAc 99:1 to 7:3); Yellow solid (56.9 mg, 83%); mp 118.0–119.1 °C;  $R_f$  0.13 (hexane/EtOAc 8:2);  $^1\text{H}$  NMR (400 MHz,  $\text{CDCl}_3$ )  $\delta$  2.55 (s, 6H), 4.08 (s, 6H), 7.99 (s, 2H);  $^{13}\text{C}$  NMR (100 MHz,  $\text{CDCl}_3$ )  $\delta$  20.7, 53.5, 128.7, 140.4, 142.9, 144.1, 165.5; IR (ATR)  $\nu$  2957, 1732, 1717, 1445, 1348, 1296, 1225, 1203, 1136, 1076, 871  $\text{cm}^{-1}$ ; MS (EI):  $m/z$  (relative intensity, %) 274 ( $[\text{M}]^+$ , 35), 243 ( $[\text{M}]^+ - \text{OMe}$ , 14), 216 ( $[\text{M}]^+ - \text{CO}_2\text{Me} + \text{H}^+$ , 16), 158 ( $[\text{M}]^+ - 2\text{CO}_2\text{Me} + 2\text{H}^+$ , 100); HRMS (EI):  $m/z$  calcd for  $\text{C}_{14}\text{H}_{14}\text{N}_2\text{O}_4$  (M) 274.0954, found 274.0952.

### Dimethyl 6,7-dichloroquinoxaline-2,3-dicarboxylate (3l)

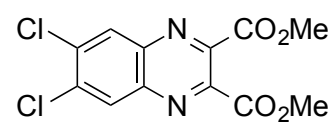 Purified by silica gel column chromatography (hexane/EtOAc 99:1 to 7:3); Yellow solid (59.7 mg, 76%); mp 152.9–153.9 °C;  $R_f$  0.35 (hexane/EtOAc 7:3);  $^1\text{H}$  NMR (400 MHz,  $\text{CDCl}_3$ )  $\delta$  4.10 (s, 6H), 8.37 (s, 2H);  $^{13}\text{C}$  NMR (100 MHz,  $\text{CDCl}_3$ )  $\delta$  53.7, 130.1, 137.8, 139.9, 144.5, 164.5; IR



(ATR)  $\nu$  1740, 1437, 1221, 1069, 976, 881, 851, 810  $\text{cm}^{-1}$ ; MS (EI):  $m/z$  (relative intensity, %) 314 ( $[\text{M}]^+$ , 58), 283 ( $[\text{M}]^+ - \text{OMe}$ , 44), 256 ( $[\text{M}]^+ - \text{CO}_2\text{Me} + \text{H}^+$ , 32), 198 ( $[\text{M}]^+ - 2\text{CO}_2\text{Me} + 2\text{H}^+$ , 100); HRMS (EI):  $m/z$  calcd for  $\text{C}_{12}\text{H}_8\text{Cl}_2\text{N}_2\text{O}_4$  (M) 313.9861, found 313.9858.

### Dimethyl 5-methylquinoxaline-2,3-dicarboxylate (3m)

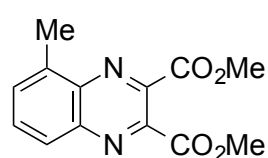

Purified by silica gel column chromatography (hexane/EtOAc 99:1 to 7:3); Yellow solid (63.6 mg, 98%); mp 111.9–112.8  $^{\circ}\text{C}$ ;  $R_f$  0.20 (hexane/EtOAc 8:2);  $^1\text{H}$  NMR (400 MHz,  $\text{CDCl}_3$ )  $\delta$  2.85 (s, 3H), 4.087 (s, 3H), 4.095 (s, 3H), 7.76–7.84 (m, 2H), 8.10 (d,  $J = 8.0$  Hz, 1H);  $^{13}\text{C}$  NMR (100 MHz,  $\text{CDCl}_3$ )  $\delta$  17.1, 53.4, 53.6, 127.7, 132.3, 132.6, 138.7, 140.8, 141.5, 142.3, 143.5, 165.1, 165.8; IR (ATR)  $\nu$  2959, 1744, 1719, 1225, 1167, 1134, 1092, 1032, 831, 797, 779  $\text{cm}^{-1}$ ; MS (EI):  $m/z$  (relative intensity, %) 260 ( $[\text{M}]^+$ , 100), 229 ( $[\text{M}]^+ - \text{OMe}$ , 43), 202 ( $[\text{M}]^+ - \text{CO}_2\text{Me} + \text{H}^+$ , 29), 144 ( $[\text{M}]^+ - 2\text{CO}_2\text{Me} + 2\text{H}^+$ , 87); HRMS (EI):  $m/z$  calcd for  $\text{C}_{13}\text{H}_{12}\text{N}_2\text{O}_4$  (M) 260.0797, found 260.0796.

### Dimethyl benzo[g]quinoxaline-2,3-dicarboxylate (3n)

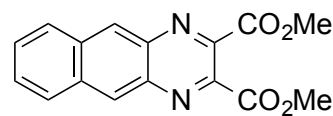

Purified by silica gel column chromatography (hexane/EtOAc 99:1 to 7:3); Orange solid (41.3 mg, 56%); mp 169.8–170.9  $^{\circ}\text{C}$ ;  $R_f$  0.23 (hexane/EtOAc 7:3);  $^1\text{H}$  NMR (400 MHz,  $\text{CDCl}_3$ )  $\delta$  4.13 (s, 3H), 7.67 (dd,  $J = 3.2, 6.4$  Hz, 2H), 8.15 (dd,  $J = 3.2, 6.4$  Hz, 2H), 8.31 (s, 2H);  $^{13}\text{C}$  NMR (100 MHz,  $\text{CDCl}_3$ )  $\delta$  53.6, 128.3, 128.8, 129.0, 135.2, 136.8, 143.8, 165.2; IR (ATR)  $\nu$  3030, 1736, 1719, 1439, 1202, 1142, 1072, 883, 872, 752  $\text{cm}^{-1}$ ; MS (EI):  $m/z$  (relative intensity, %) 296 ( $[\text{M}]^+$ , 100), 265 ( $[\text{M}]^+ - \text{OMe}$ , 9), 238 ( $[\text{M}]^+ - \text{CO}_2\text{Me} + \text{H}^+$ , 5), 180 ( $[\text{M}]^+ - 2\text{CO}_2\text{Me} + 2\text{H}^+$ , 83); HRMS (EI):  $m/z$  calcd for  $\text{C}_{16}\text{H}_{12}\text{N}_2\text{O}_4$  (M) 296.0797, found 296.0793.

### Tetramethyl [6,6'-biquinoxaline]-2,2',3,3'-tetracarboxylate (3o)

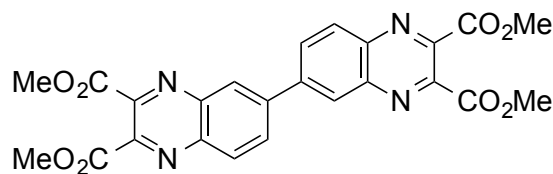

Purified by silica gel column chromatography ( $\text{CHCl}_3/\text{MeOH}$  99:1 to 95:5); Brown solid (86.7 mg, 71%); mp 225.0–225.5  $^{\circ}\text{C}$  (dec.);  $R_f$  0.50 ( $\text{CHCl}_3/\text{MeOH}$  95:5);  $^1\text{H}$  NMR (400 MHz,  $\text{CDCl}_3$ )  $\delta$  4.13 (s, 12H), 8.35 (dd,  $J = 2.0, 8.8$  Hz, 2H), 8.44 (d,  $J = 8.8$  Hz, 2H), 8.64 (d,  $J = 2.0$  Hz, 2H);  $^{13}\text{C}$  NMR (100 MHz,  $\text{CDCl}_3$ )  $\delta$  53.8, 128.3, 131.0, 132.0, 141.2, 141.6, 142.9, 144.1, 144.8, 165.0; IR (ATR)  $\nu$  1726, 1437, 1221, 1132, 1068, 812  $\text{cm}^{-1}$ ; MS (EI):  $m/z$  (relative intensity, %) 490 ( $[\text{M}]^+$ , 71), 459 ( $[\text{M}]^+ - \text{OMe}$ , 13), 432 ( $[\text{M}]^+ - \text{CO}_2\text{Me} + \text{H}^+$ , 3), 374 ( $[\text{M}]^+ - 2\text{CO}_2\text{Me} + 2\text{H}^+$ , 100); HRMS (EI):  $m/z$  calcd for  $\text{C}_{24}\text{H}_{18}\text{N}_4\text{O}_8$  (M) 490.1125, found 490.1123.



### Dibutyl quinoxaline-2,3-dicarboxylate (3p)

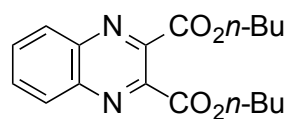

Purified by silica gel column chromatography (hexane/EtOAc 99:1 to 7:3); Yellow oil (63.8 mg, 77%);  $R_f$  0.30 (hexane/EtOAc 8:2);  $^1\text{H}$  NMR (400 MHz,  $\text{CDCl}_3$ )  $\delta$  0.99 (t,  $J = 7.2$  Hz, 6H), 1.49 (tq,  $J = 7.2$ , 7.6 Hz, 4H), 1.83 (tt,  $J = 7.2$ , 7.6 Hz, 4H), 4.50 (t,  $J = 7.2$  Hz, 4H), 7.93 (dd,  $J = 3.6$ , 6.4 Hz, 2H), 8.26 (dd,  $J = 3.6$ , 6.4 Hz, 2H);  $^{13}\text{C}$  NMR (100 MHz,  $\text{CDCl}_3$ )  $\delta$  13.6, 18.9, 30.3, 66.6, 129.7, 132.3, 141.2, 144.1, 164.8; IR (ATR)  $\nu$  2961, 2934, 1749, 1722, 1466, 1331, 1234, 1174, 1132, 1062, 764  $\text{cm}^{-1}$ ; MS (EI):  $m/z$  (relative intensity, %) 330 ( $[\text{M}]^+$ , 24), 202 (100), 130 ( $[\text{M}]^+ - 2\text{CO}_2\text{Bu} + 2\text{H}^+$ , 77); HRMS (EI):  $m/z$  calcd for  $\text{C}_{18}\text{H}_{22}\text{N}_2\text{O}_4$  (M) 330.1580, found 330.1577.

### Dibutyl 6-nitroquinoxaline-2,3-dicarboxylate (3q)

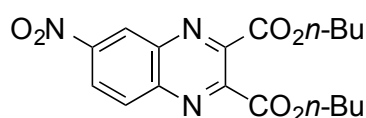

Purified by silica gel column chromatography (hexane/EtOAc 99:1 to 7:3); Red oil (41.2 mg, 44%);  $R_f$  0.35 (hexane/EtOAc 8:2);  $^1\text{H}$  NMR (400 MHz,  $\text{CDCl}_3$ )  $\delta$  1.00 (m, 6H), 1.50 (m, 4H), 1.84 (m, 4H), 4.52 (t,  $J = 6.8$  Hz, 4H), 8.43 (d,  $J = 9.2$  Hz, 1H), 8.69 (dd,  $J = 2.4$ , 9.2 Hz, 1H), 9.16 (d,  $J = 2.4$  Hz, 1H);  $^{13}\text{C}$  NMR (100 MHz,  $\text{CDCl}_3$ )  $\delta$  13.6, 19.0, 30.3, 30.4, 67.08, 67.09, 125.6, 125.9, 131.6, 140.3, 143.4, 145.9, 146.9, 149.2, 163.9, 164.0; IR (ATR)  $\nu$  2960, 2935, 1742, 1728, 1533, 1348, 1219, 1159, 1116, 1064  $\text{cm}^{-1}$ ; MS (EI):  $m/z$  (relative intensity, %) 375 ( $[\text{M}]^+$ , 33), 247 (100), 175 ( $[\text{M}]^+ - 2\text{CO}_2\text{Bu} + 2\text{H}^+$ , 56); HRMS (EI):  $m/z$  calcd for  $\text{C}_{18}\text{H}_{21}\text{N}_3\text{O}_6$  (M) 375.1430, found 375.1432.

### Butyl 6,7-dichloro-3-(phenylsulfonyl)quinoxaline-2-carboxylate (3r)

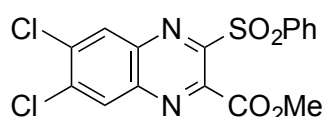

Purified by silica gel column chromatography (hexane/EtOAc 99:1 to 7:3); Red solid (64.8 mg, 65%); mp 133.0–134.8  $^{\circ}\text{C}$  (dec.);  $R_f$  0.43 (hexane/EtOAc 7:3);  $^1\text{H}$  NMR (400 MHz,  $\text{CDCl}_3$ )  $\delta$  4.18 (s, 3H), 7.58–7.71 (m, 3H), 8.15 (d,  $J = 8.0$  Hz, 2H), 8.26 (s, 1H), 8.30 (s, 1H);  $^{13}\text{C}$  NMR (100 MHz,  $\text{CDCl}_3$ )  $\delta$  54.0, 129.2, 129.6, 129.8, 130.2, 143.6, 137.5, 138.1, 139.1, 139.4, 139.9, 144.7, 151.8, 164.4; IR (ATR)  $\nu$  1754, 1441, 1325, 1159, 1138, 1085, 1043, 882, 849, 733  $\text{cm}^{-1}$ ; MS (FAB):  $m/z$  (relative intensity, %) 397 ( $[\text{M}]^+ + \text{H}^+$ , 10), 307 (24), 154 (100), 136 (87); HRMS (FAB):  $m/z$  calcd for  $\text{C}_{16}\text{H}_{12}\text{Cl}_2\text{N}_2\text{O}_4\text{S}$  (M) 396.9817, found 396.9818.

### Quinoxaline-2,3-dicarboxylic acid (6)

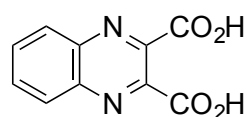

Purple solid; mp 188.6–188.8  $^{\circ}\text{C}$  (dec.);  $^1\text{H}$  NMR (400 MHz,  $\text{DMSO}-d_6$ )  $\delta$  8.04 (dd,  $J = 3.2$ , 6.4 Hz, 2H), 8.22 (dd,  $J = 3.2$ , 6.4 Hz, 2H);  $^{13}\text{C}$  NMR (100 MHz,  $\text{DMSO}-d_6$ )  $\delta$  129.3, 132.7, 140.5, 145.1, 166.1; IR (ATR)  $\nu$  3028, 2554, 1682, 1474, 1275, 1240, 1169, 1063, 906, 781, 770, 742  $\text{cm}^{-1}$ ; MS (FAB):  $m/z$  (relative intensity, %) 219 ( $[\text{M}]^+ + \text{H}^+$ , 33), 154 (100), 136 (77); HRMS (FAB):  $m/z$  calcd for

C<sub>10</sub>H<sub>7</sub>N<sub>2</sub>O<sub>4</sub> (M) 219.0406, found 219.0410.

### Quinoxaline-2,3-dicarboxylic acid anhydride (7)

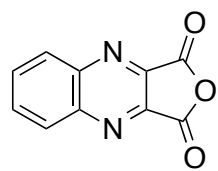

Brown solid; mp 250.5–251.5 °C (dec.); <sup>1</sup>H NMR (400 MHz, DMSO-*d*<sub>6</sub>) δ 8.22 (dd, *J* = 3.6, 6.8 Hz, 2H), 8.47 (dd, *J* = 3.6, 6.8 Hz, 2H); <sup>13</sup>C NMR (100 MHz, DMSO-*d*<sub>6</sub>) δ 130.8, 134.5, 143.3, 144.9, 159.9; IR (ATR) ν 1876, 1788, 1647, 1585, 1368, 1177, 1103, 927, 887, 775 cm<sup>-1</sup>; MS (EI): *m/z* (relative intensity, %) 200 ([M]<sup>+</sup>, 40), 156 (58), 128 (100); HRMS (EI): *m/z* calcd for C<sub>10</sub>H<sub>4</sub>N<sub>2</sub>O<sub>3</sub> (M) 200.0222, found 200.0220.

### 2-(*p*-Tolyl)-1*H*-pyrrolo[3,4-*b*]quinoxaline-1,3(2*H*)-dione (8)

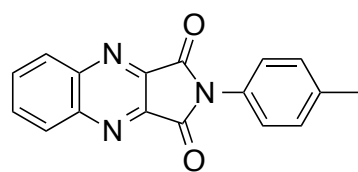

Purified by silica gel column chromatography (CH<sub>2</sub>Cl<sub>2</sub>); Yellow solid; 374.4–375.5 °C (dec.); R<sub>f</sub> 0.55 (CH<sub>2</sub>Cl<sub>2</sub>); <sup>1</sup>H NMR (400 MHz, CDCl<sub>3</sub>) δ 2.45 (s, 3H), 7.37 (d, *J* = 8.4 Hz, 2H), 7.42 (d, *J* = 8.4 Hz, 2H), 8.06 (dd, *J* = 3.6, 5.4 Hz, 2H), 8.48 (dd, *J* = 3.6, 5.4 Hz, 2H); <sup>13</sup>C NMR (100 MHz, DMSO-*d*<sub>6</sub>) δ 20.8, 127.0, 128.8, 129.5, 130.6, 133.1, 138.3, 143.0, 146.3, 163.6; IR (ATR) ν 3069, 2918, 1788, 1720, 1510, 1379, 1143, 1117, 1089, 885, 795, 779 cm<sup>-1</sup>; MS (EI): *m/z* (relative intensity, %) 289 ([M]<sup>+</sup>, 100), 245 (13), 128 (24); HRMS (EI): *m/z* calcd for C<sub>17</sub>H<sub>11</sub>N<sub>3</sub>O<sub>2</sub> (M) 289.0851, found 289.0850.

### *tert*-Butyl (2-aminophenyl)carbamate (9)<sup>S5</sup>

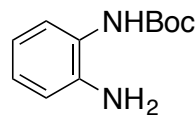

Purified by silica gel column chromatography (hexane/EtOAc 99:1 to 5:5); Colorless solid; mp 112.3–113.8 °C; R<sub>f</sub> 0.13 (hexane/EtOAc 8:2); <sup>1</sup>H NMR (400 MHz, CDCl<sub>3</sub>) δ 1.50 (s, 9H), 3.73 (br, s, 2H), 6.37 (br, s, 1H), 6.72–6.78 (m, 2H), 6.97 (t, *J* = 7.2 Hz, 1H), 7.25 (m, 1H); <sup>13</sup>C NMR (100 MHz, CDCl<sub>3</sub>) δ 28.3, 80.4, 117.5, 119.4, 124.7, 126.0 (2C), 139.9, 153.8; IR (ATR) ν 3354, 1678, 1516, 1491, 1456, 1288, 1254, 1153, 1055, 748 cm<sup>-1</sup>; MS (EI): *m/z* (relative intensity, %) 208 ([M]<sup>+</sup>, 16), 152 ([M]<sup>+</sup> – C<sub>4</sub>H<sub>9</sub> + H<sup>+</sup>, 57), 108 ([M]<sup>+</sup> – Boc + H<sup>+</sup>, 100); HRMS (EI): *m/z* calcd for C<sub>11</sub>H<sub>16</sub>N<sub>2</sub>O<sub>2</sub> (M) 208.1212, found 208.1211.

### Dimethyl 2-((2-((*tert*-butoxycarbonyl)amino)phenyl)amino)fumarate (9)

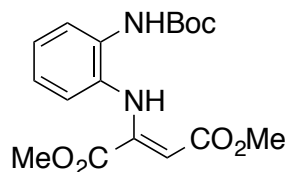

Purified by silica gel column chromatography (hexane/EtOAc 99:1 to 7:3); Yellow solid; mp 80.2–81.0 °C; R<sub>f</sub> 0.40 (hexane/EtOAc 7:3); <sup>1</sup>H NMR (400 MHz, CDCl<sub>3</sub>) δ 1.53 (s, 9H), 3.59 (s, 3H), 3.76 (s, 3H), 5.59 (s, 1H), 6.83–6.96 (m, 3H), 7.17 (m, 1H), 7.95 (d, *J* = 7.6 Hz, 1H), 9.05 (br, s, 1H); <sup>13</sup>C NMR (100 MHz, CDCl<sub>3</sub>) δ 28.0, 51.0, 52.4, 80.4, 95.2, 120.4, 123.0, 124.2, 126.5, 130.5, 133.2, 149.5, 152.6, 163.9, 169.4; IR (ATR) ν 3377, 2970, 1740, 1721, 1670, 1612, 1595, 1516, 1437, 1363, 1271, 1217, 1143, 1022, 777, 764 cm<sup>-1</sup>; MS (EI): *m/z*

(relative intensity, %) 350 ( $[M]^+$ , 11), 294 ( $[M]^+ - C_4H_9 + H^+$ , 12), 250 ( $[M]^+ - Boc + H^+$ , 24), 191 ( $[M]^+ - Boc - CO_2Me + H^+$ , 98), 159 (92), 57 (100); HRMS (EI):  $m/z$  calcd for  $C_{17}H_{22}N_2O_6$  (M) 350.1478, found 350.1474.

**1-(*tert*-Butyl) 2,3-dimethyl quinoxaline-1,2,3(2*H*)-tricarboxylate (10)**

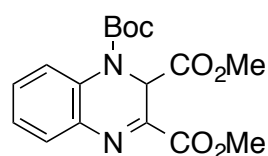

Purified by silica gel column chromatography (hexane/EtOAc 99:1 to 7:3); Colorless solid; mp 110.6–111.3 °C;  $R_f$  0.19 (hexane/EtOAc 8:2);  $^1H$  NMR (400 MHz,  $CDCl_3$ )  $\delta$  1.57 (s, 9H), 3.64 (s, 3H), 4.03 (s, 3H), 6.47 (br, s, 1H), 7.18 (m, 1H), 7.37 (m, 1H), 7.61 (m, 1H), 7.88 (br, s, 1H);  $^{13}C$  NMR (100 MHz,  $CDCl_3$ )  $\delta$  28.1, 51.3, 53.0, 53.5, 83.5, 122.7, 124.6, 129.0, 129.2, 130.4, 135.4, 150.1, 151.6, 163.3, 167.2; IR (ATR)  $\nu$  2959, 1726, 1712, 1476, 1440, 1367, 1338, 1269, 1226, 1157, 1123, 1010, 870, 799, 770, 754  $cm^{-1}$ ; MS (EI):  $m/z$  (relative intensity, %) 348 ( $[M]^+$ , 3), 289 ( $[M]^+ - CO_2Me$ , 2), 247 ( $[M]^+ - Boc$ , 2), 189 ( $[M]^+ - Boc - CO_2Me + H^+$ , 100), 57 (54); HRMS (EI):  $m/z$  calcd for  $C_{17}H_{20}N_2O_6$  (M) 348.1321, found 348.1325.

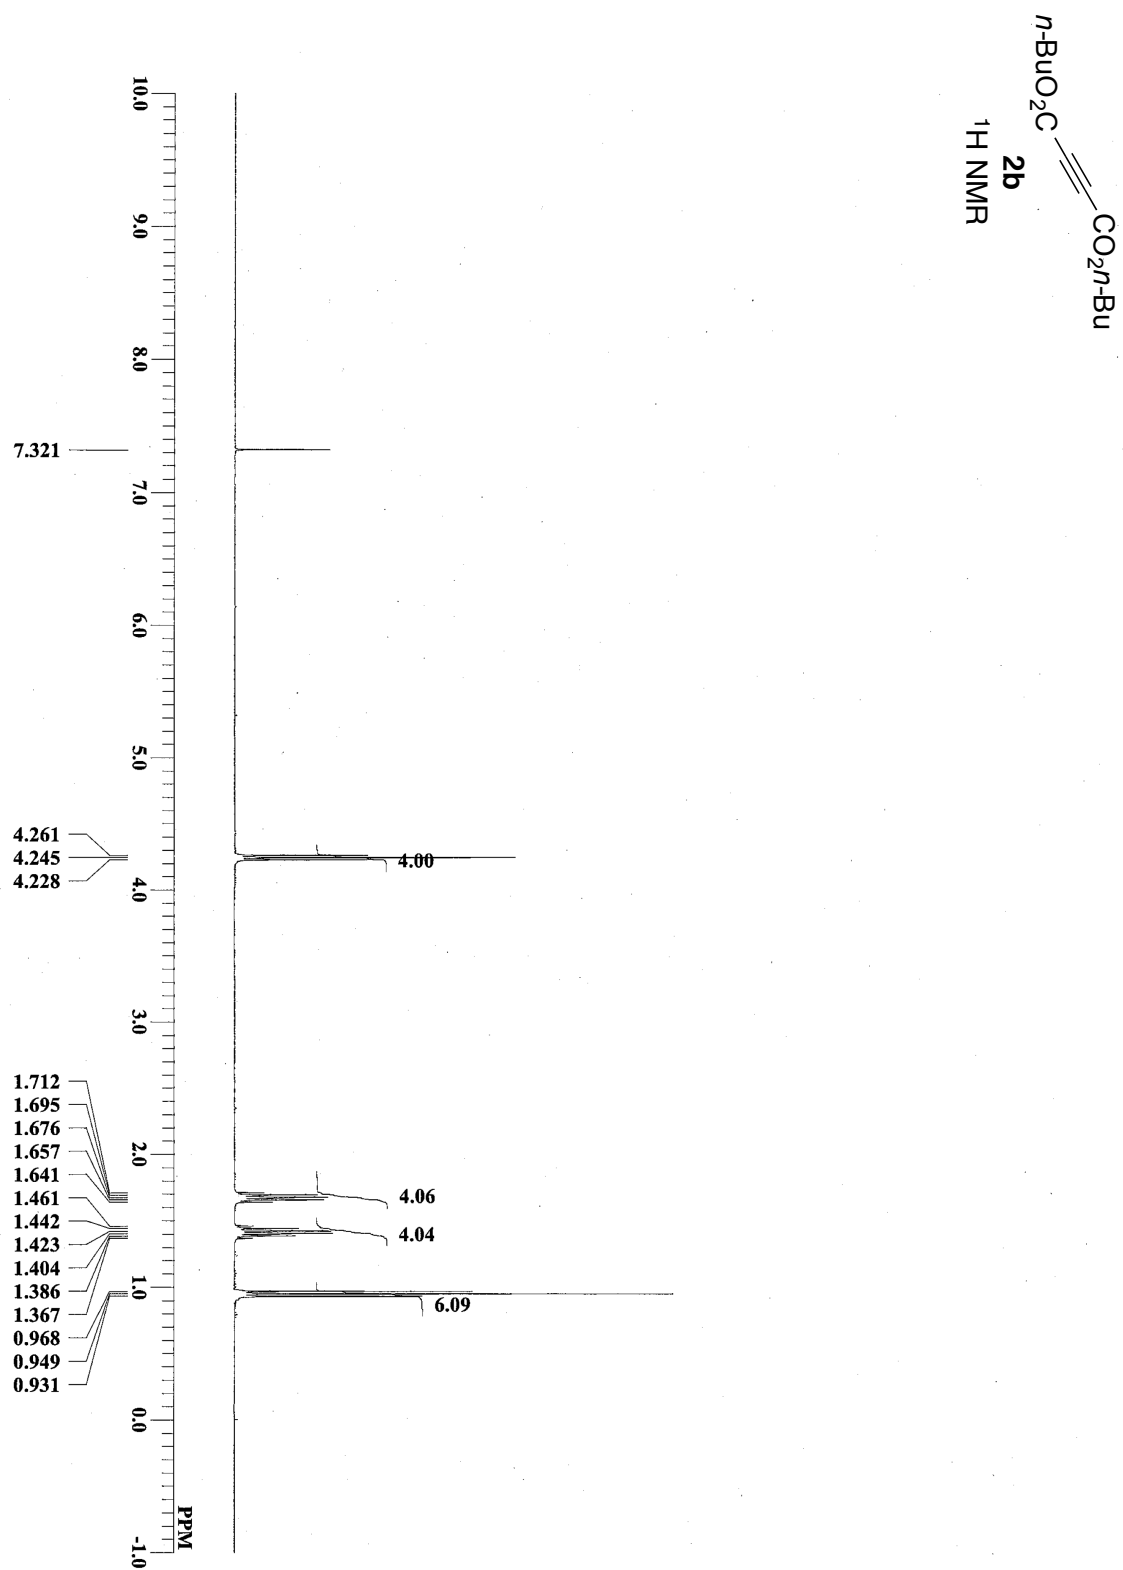

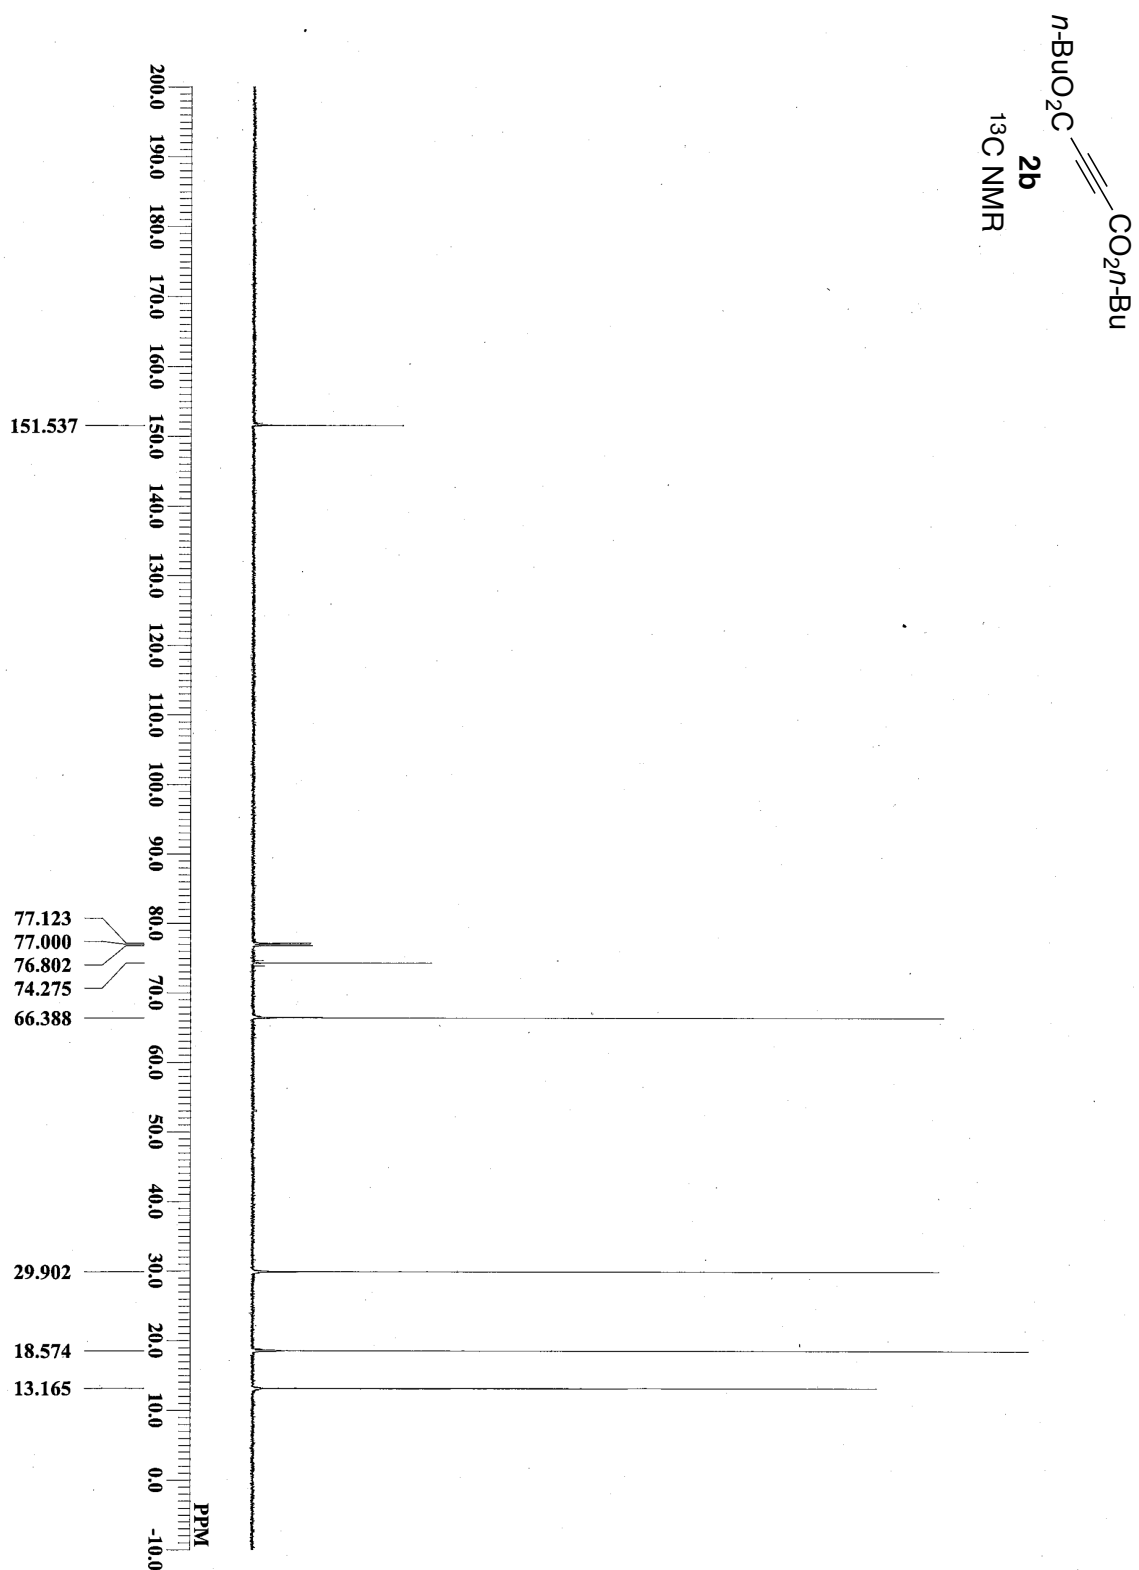

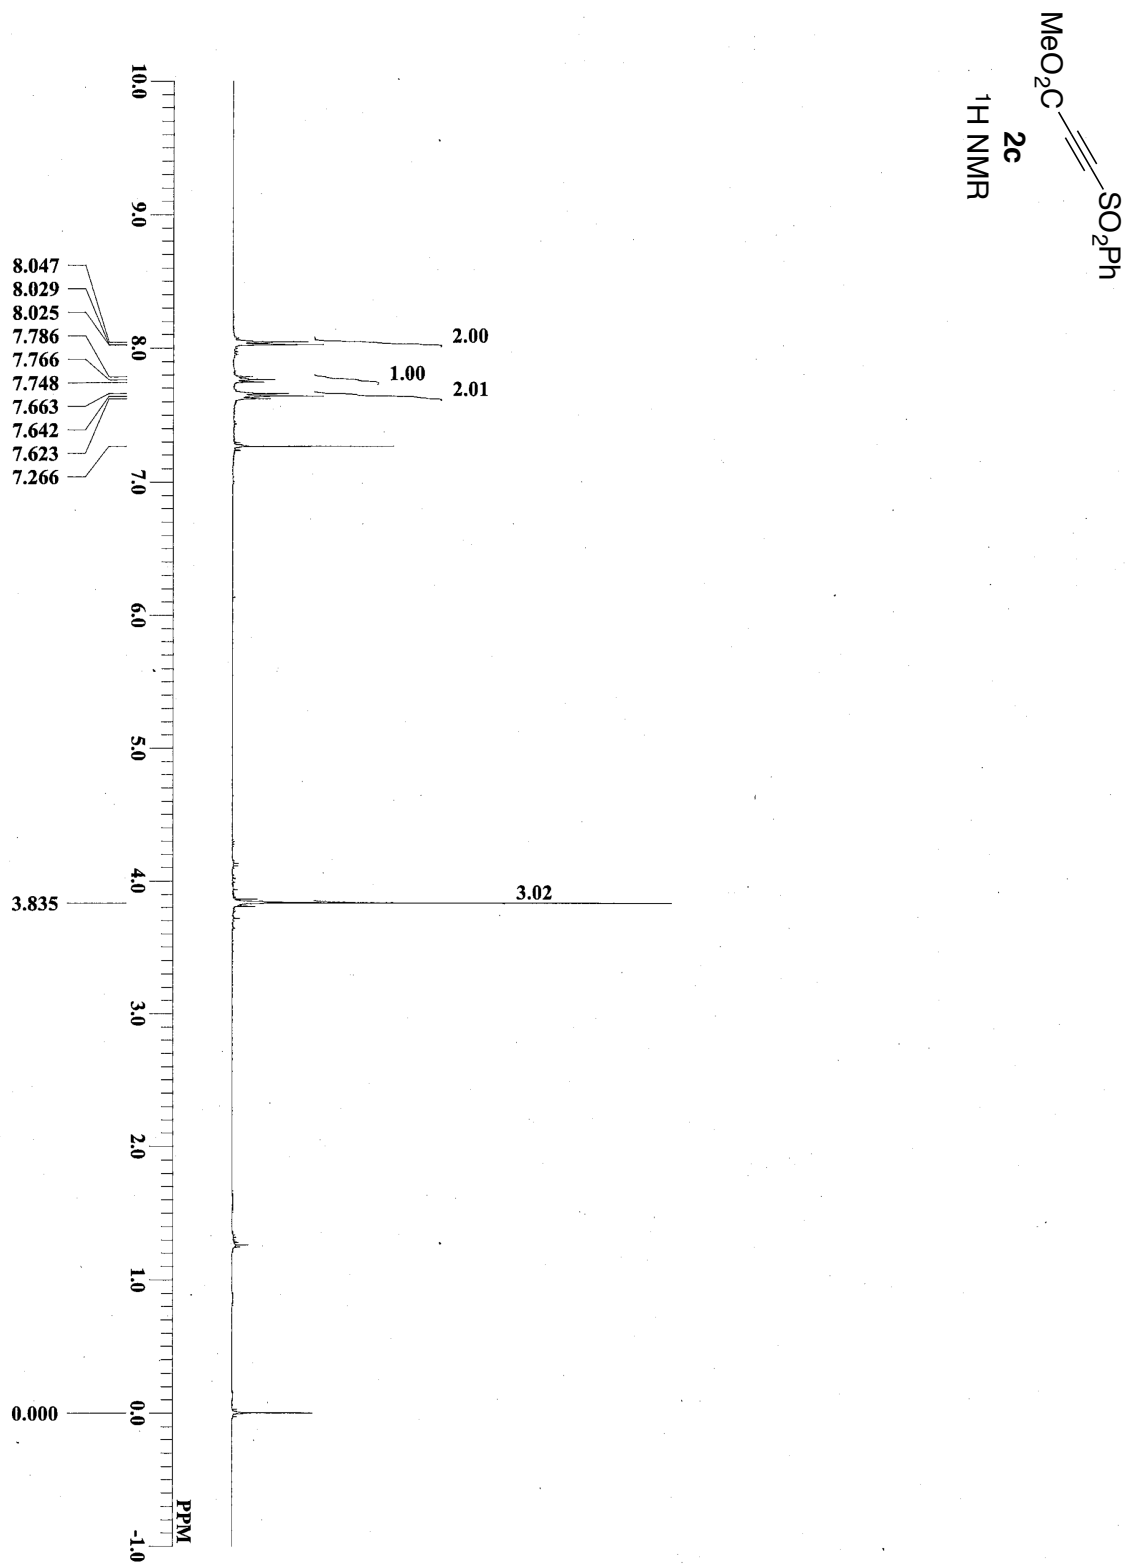

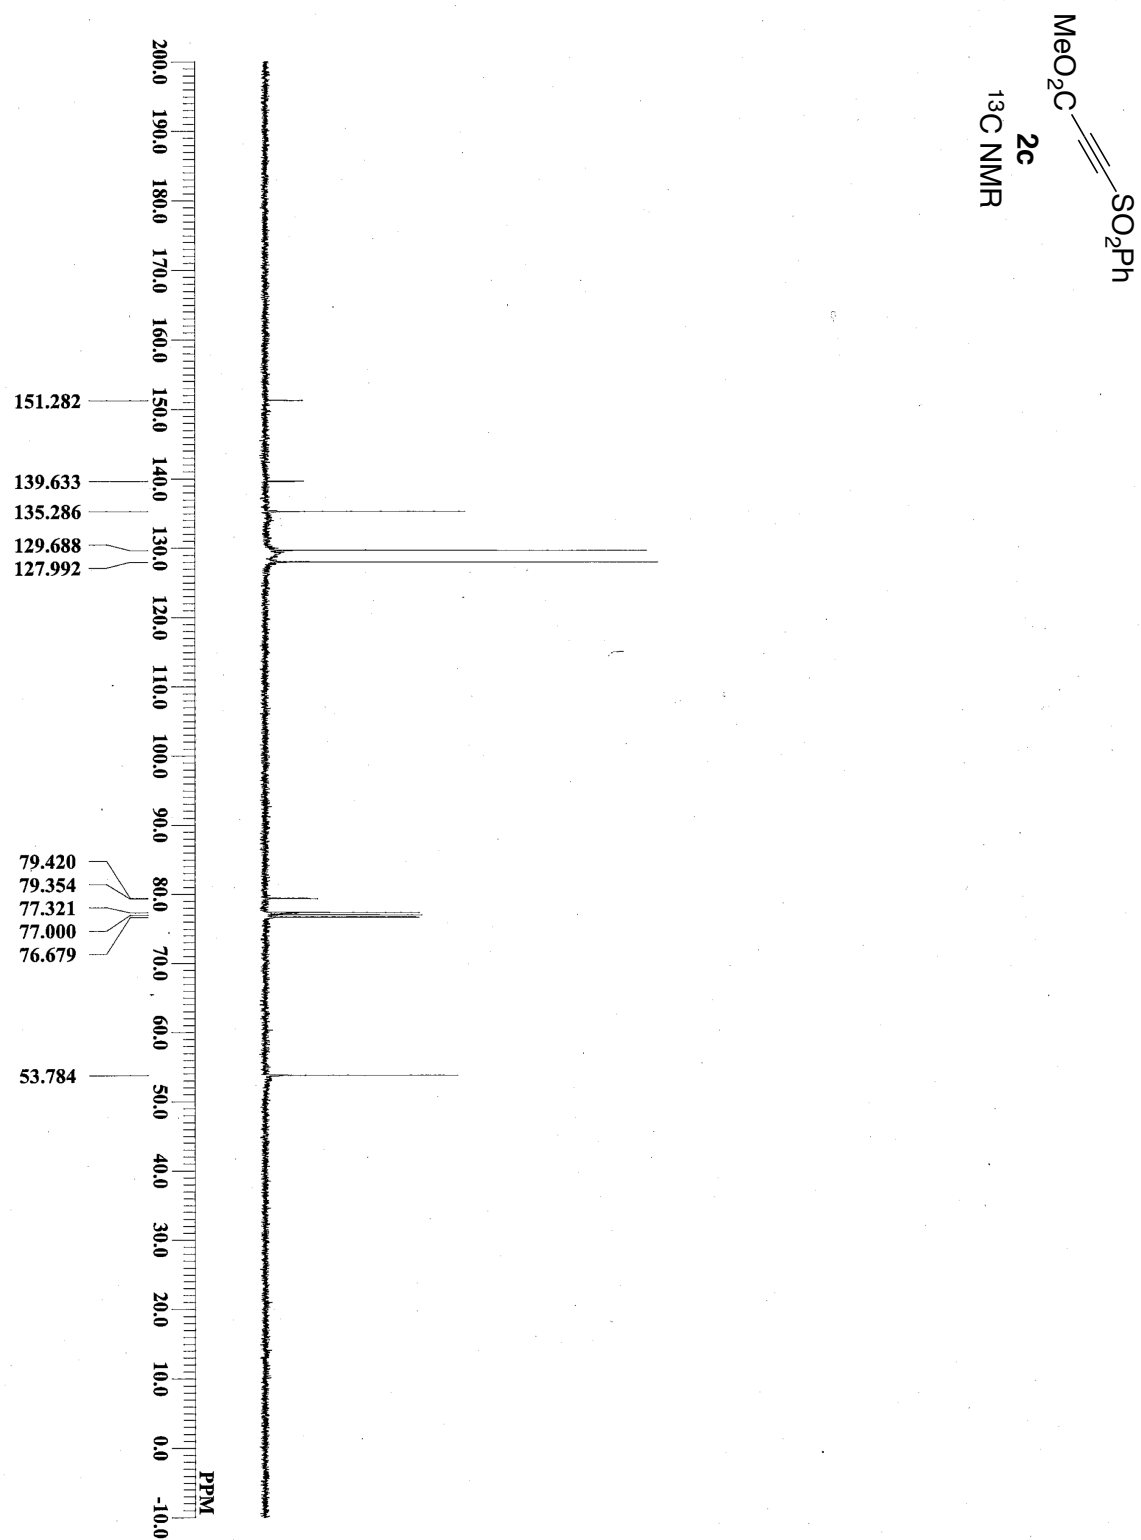

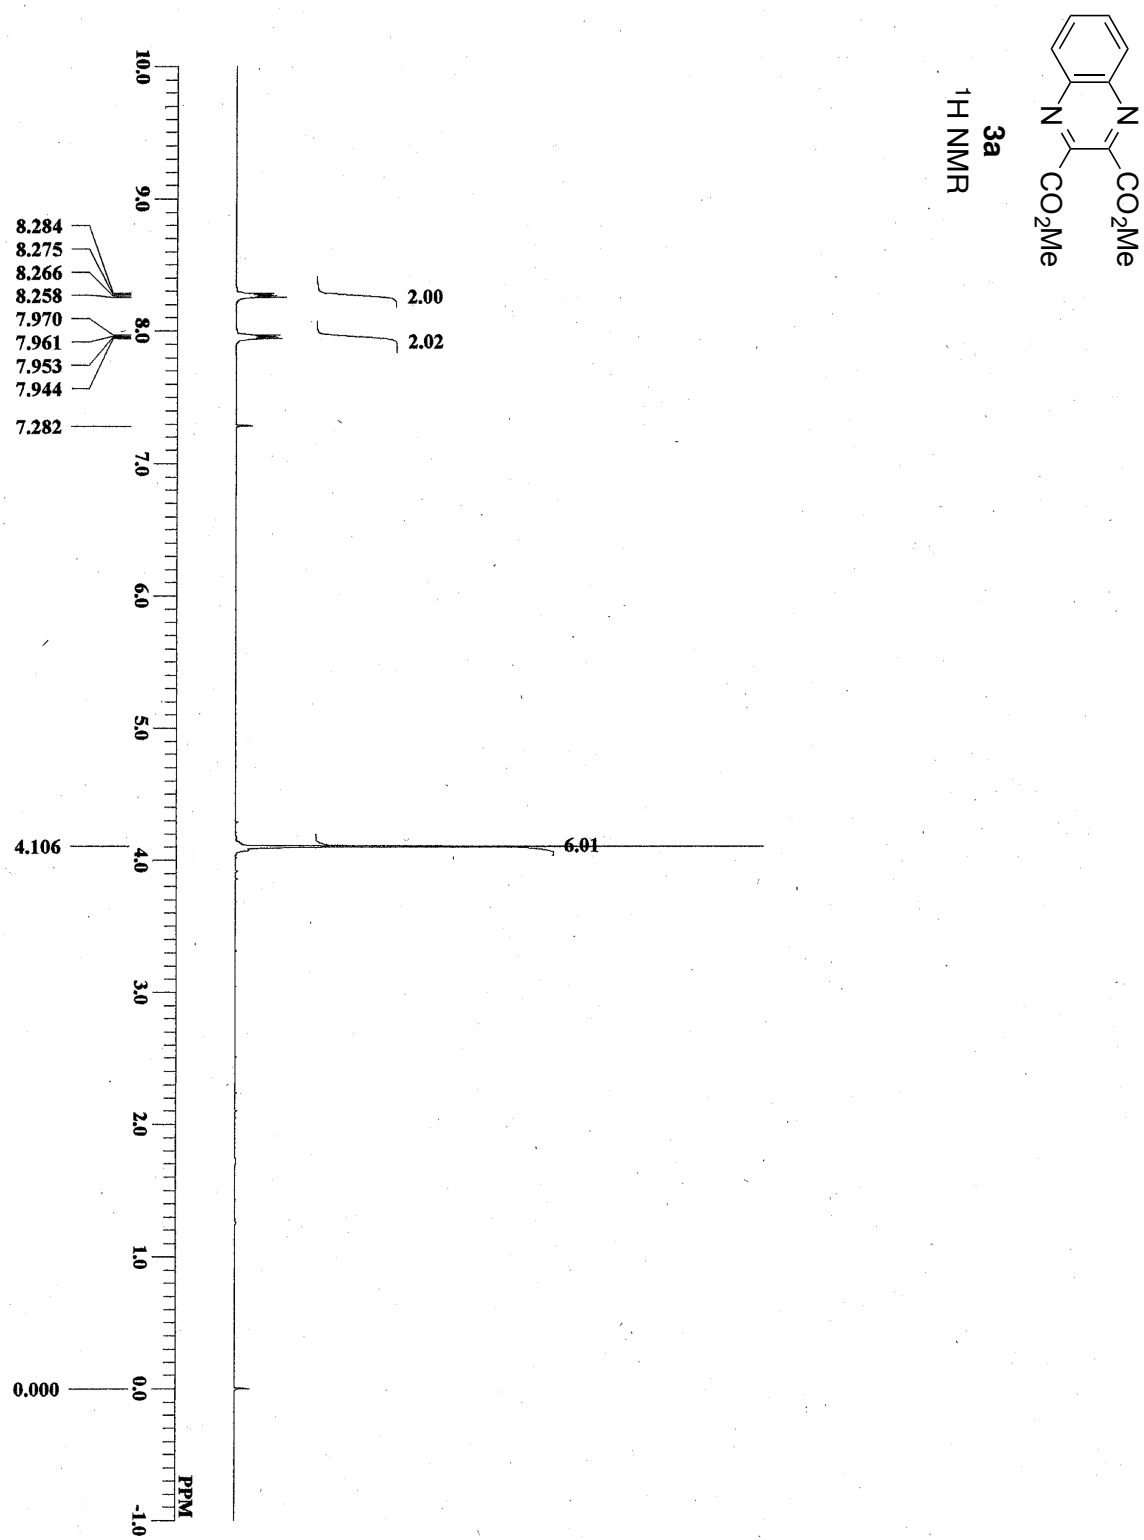



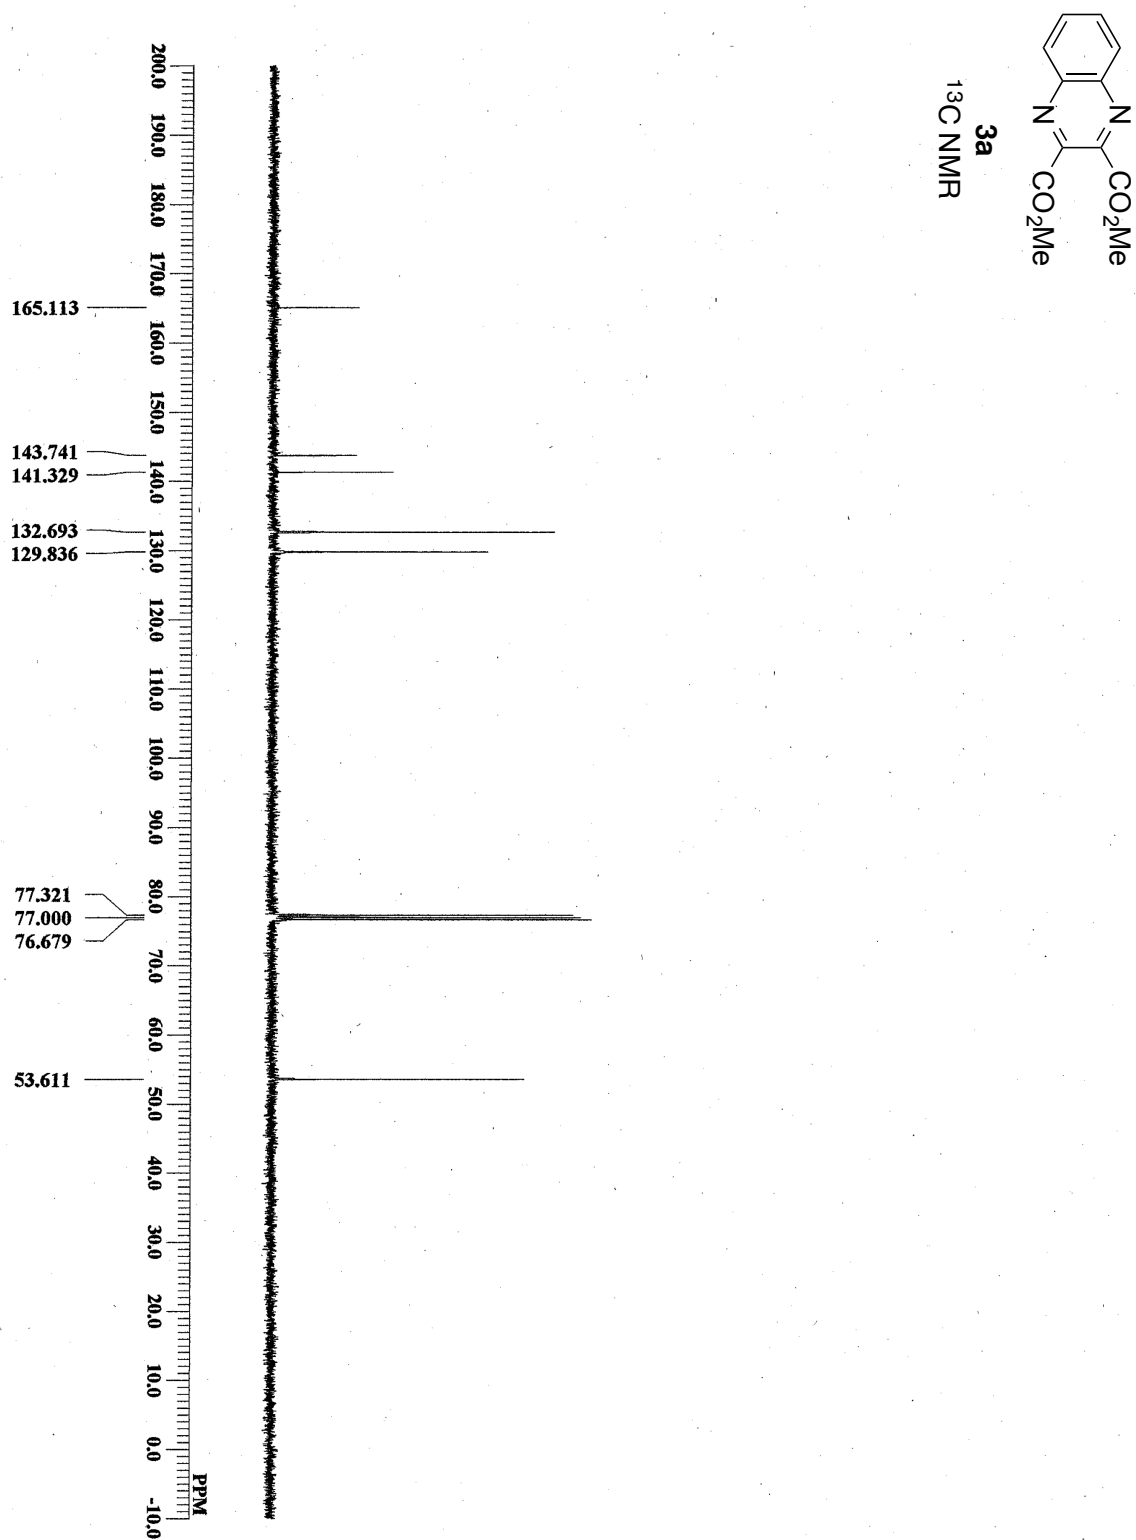

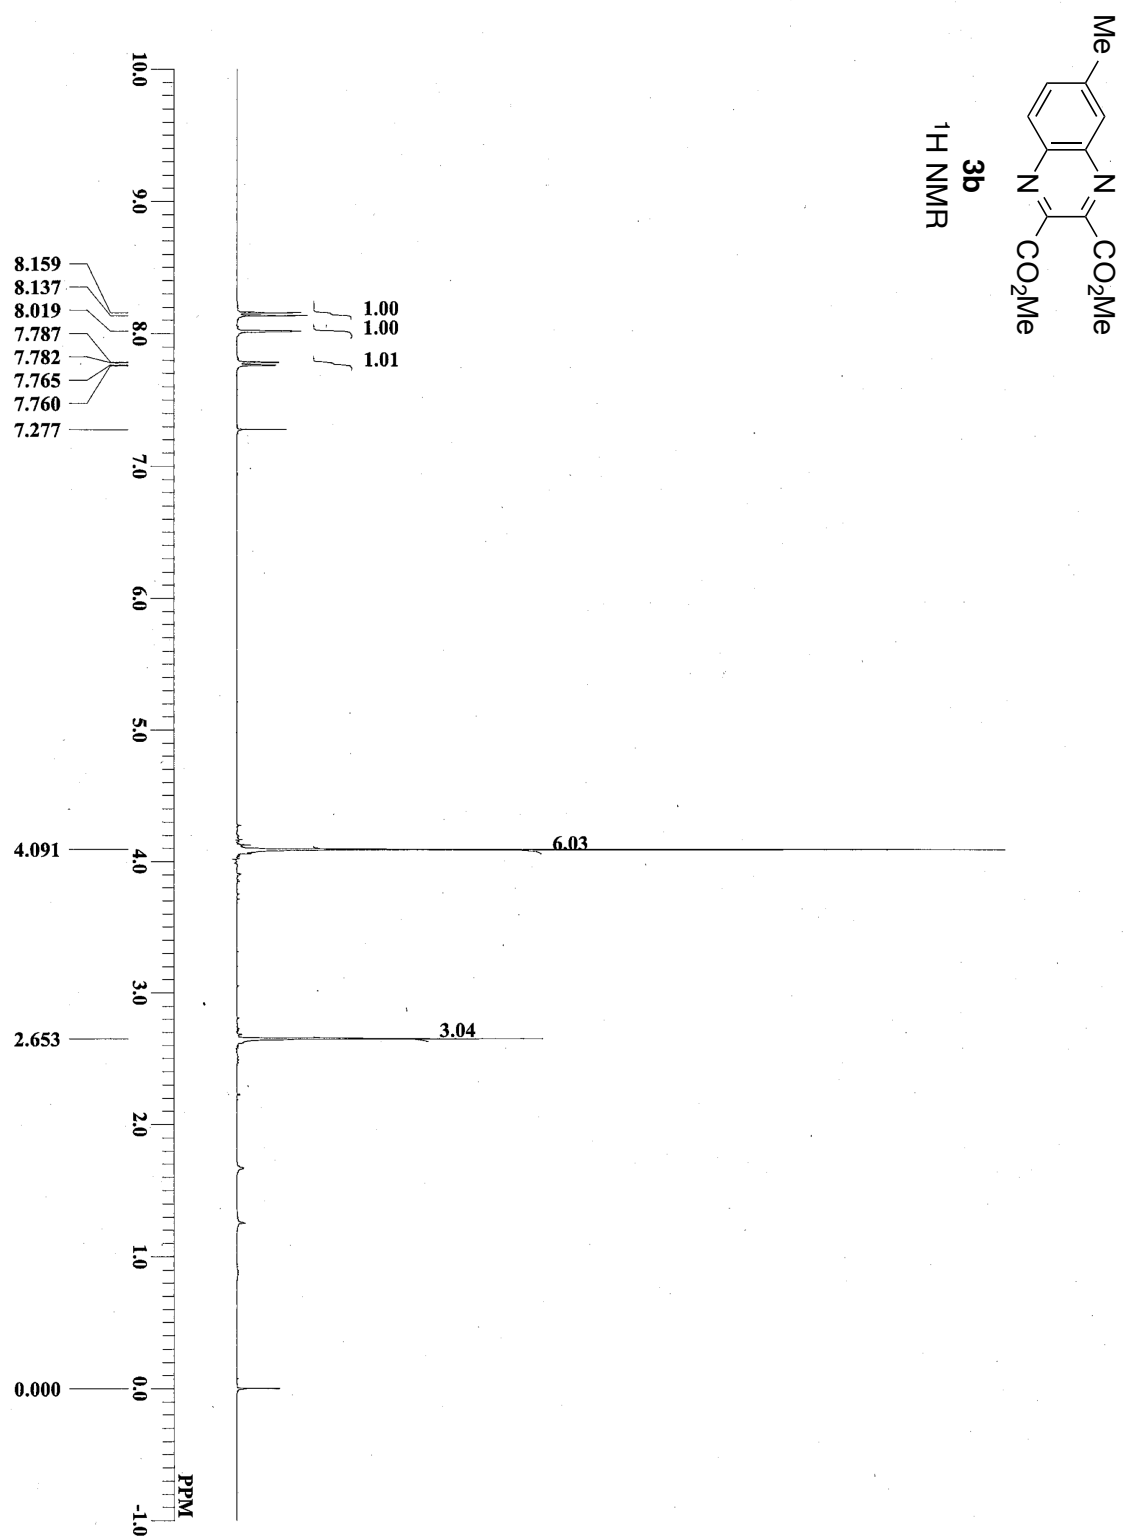

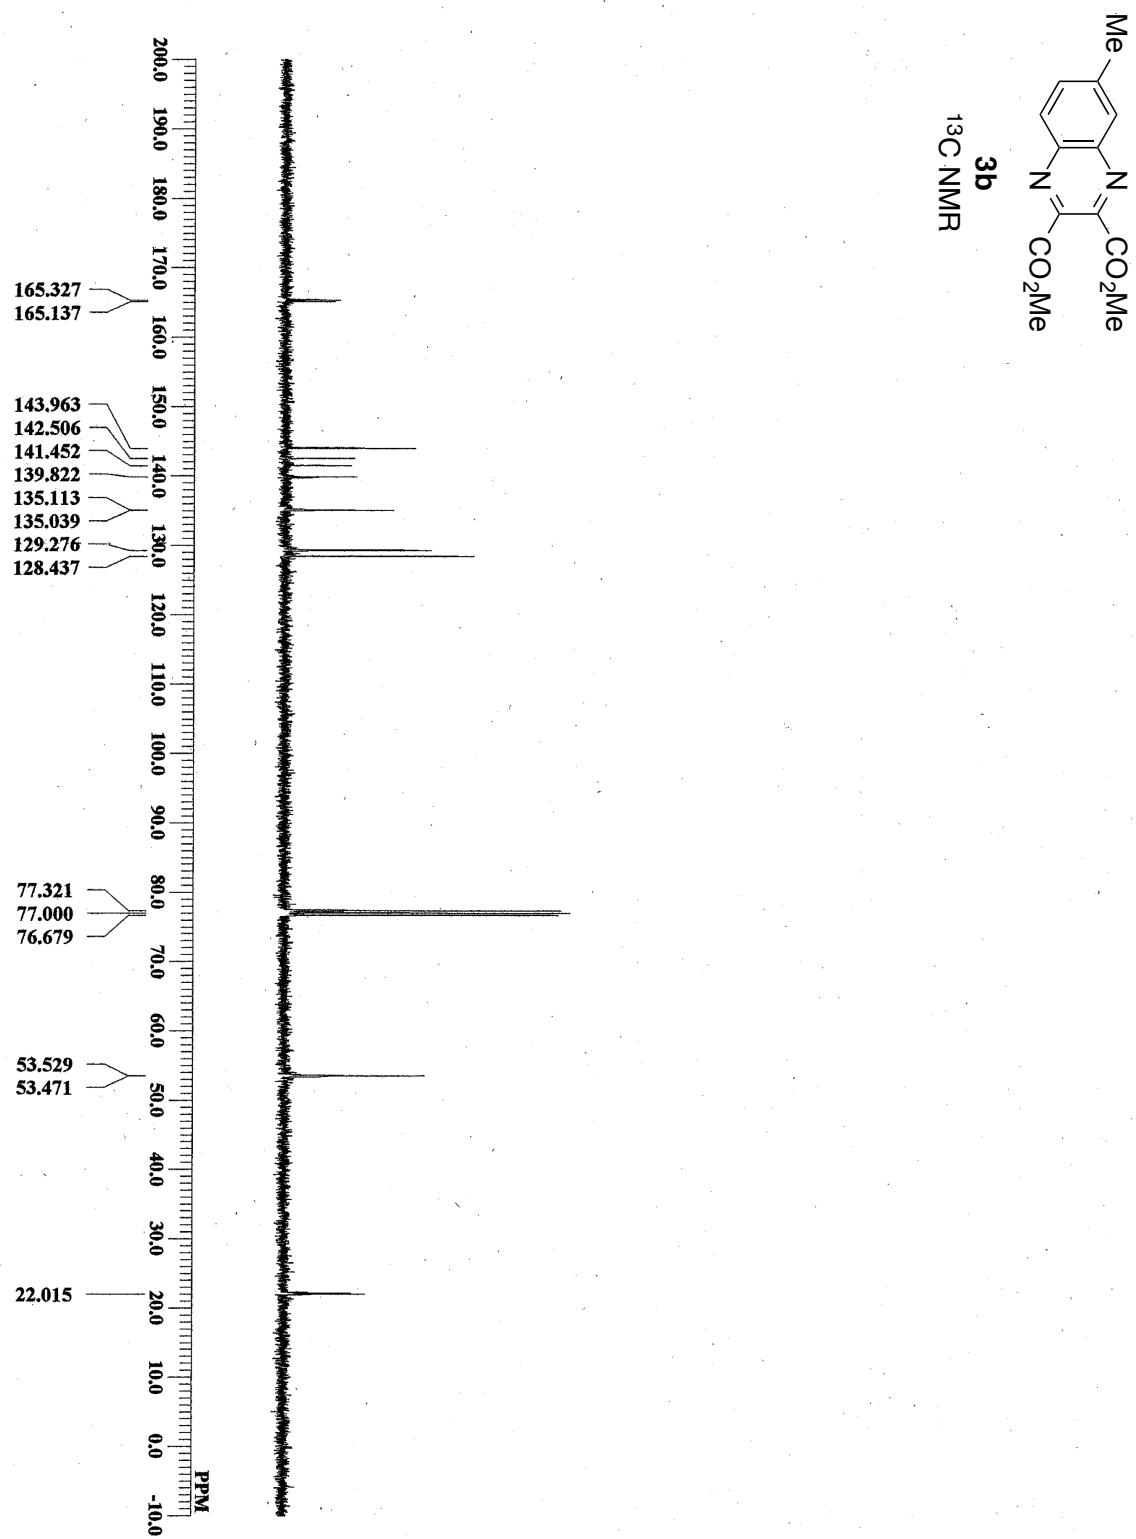

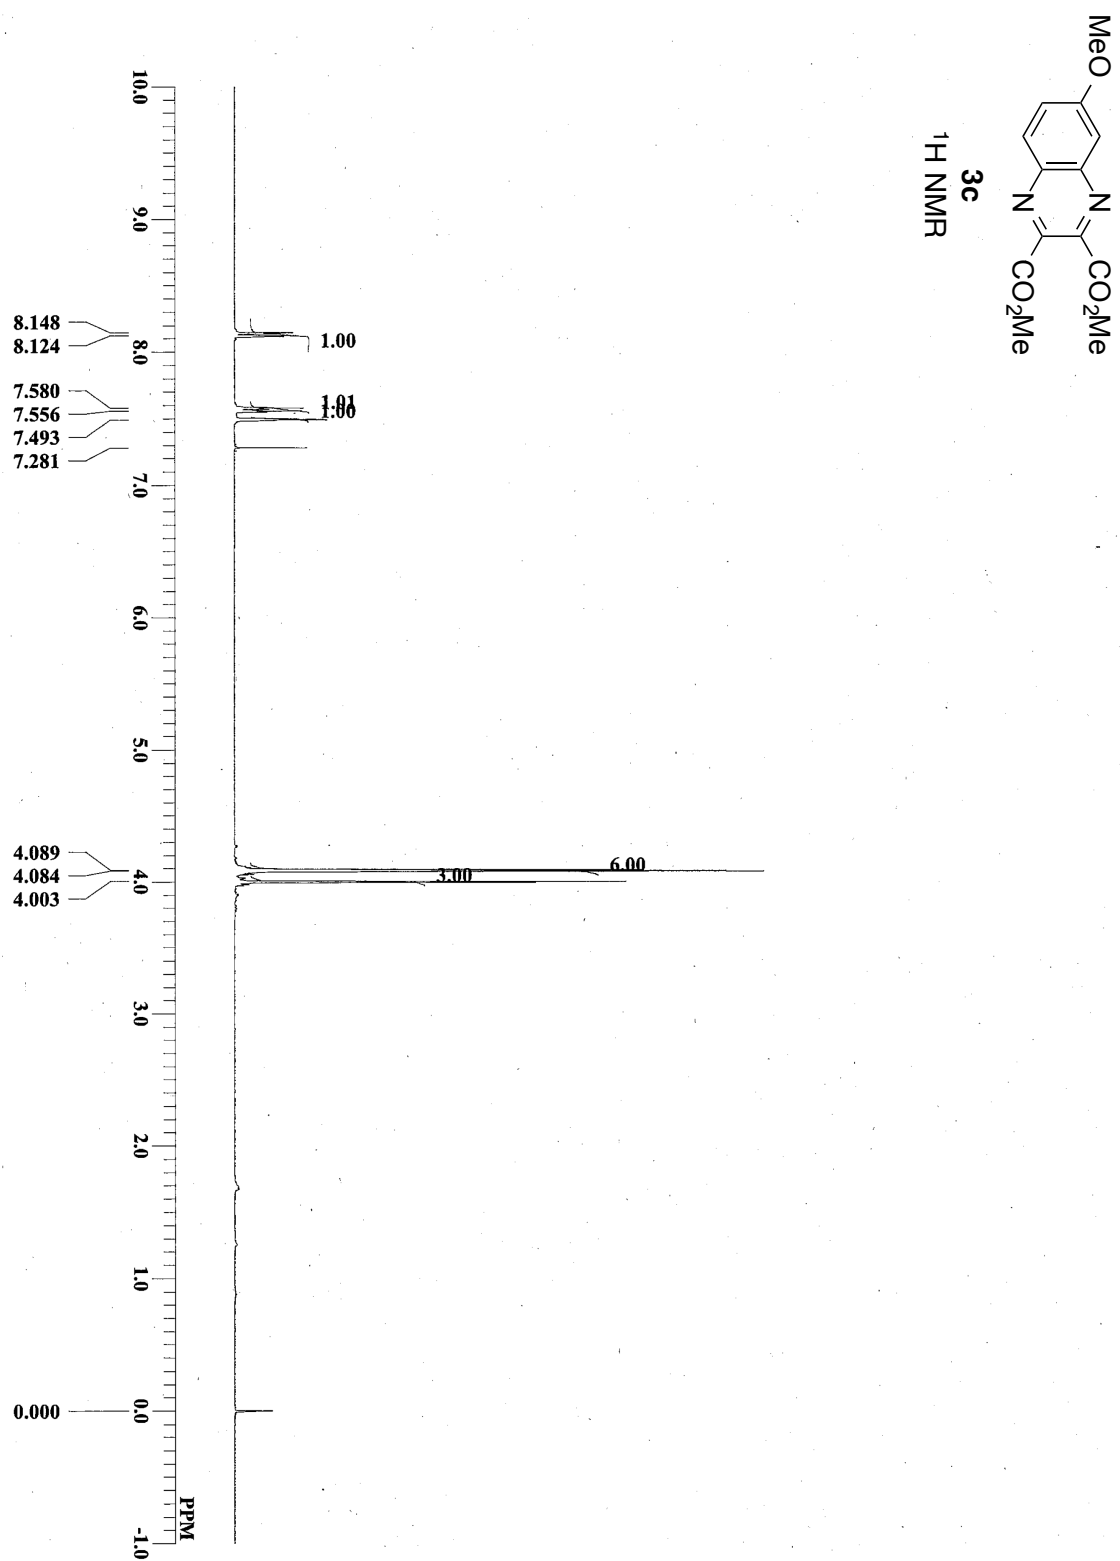

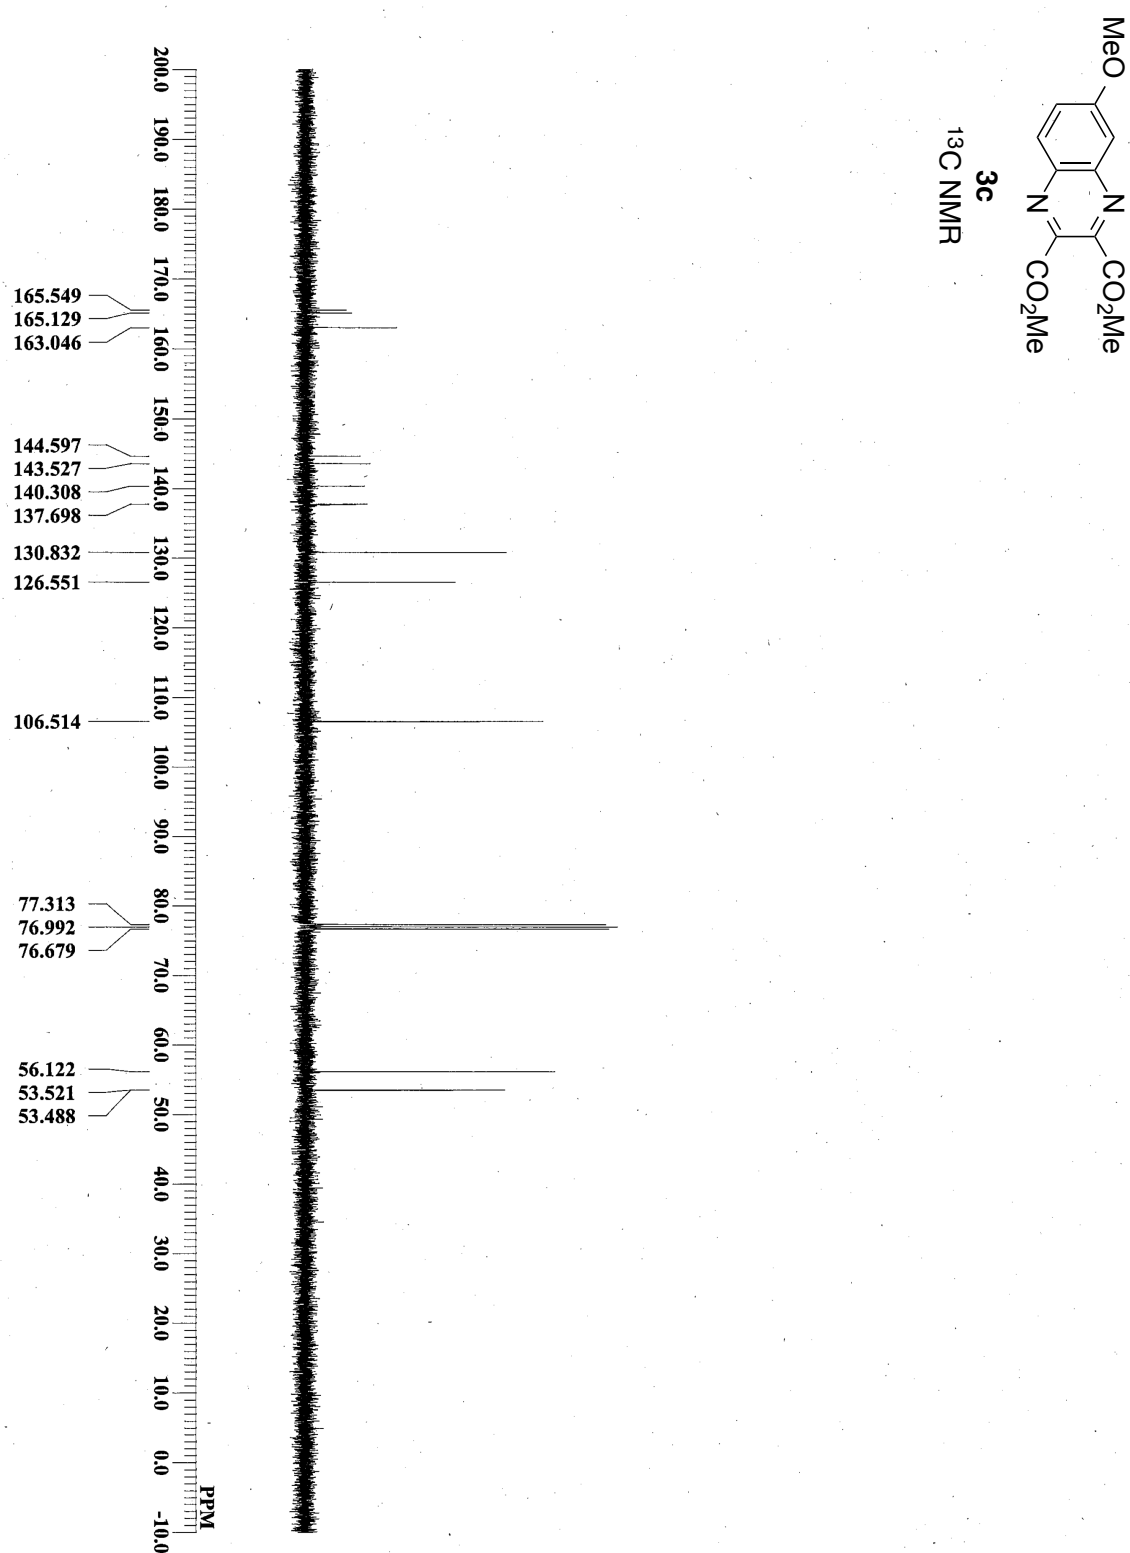

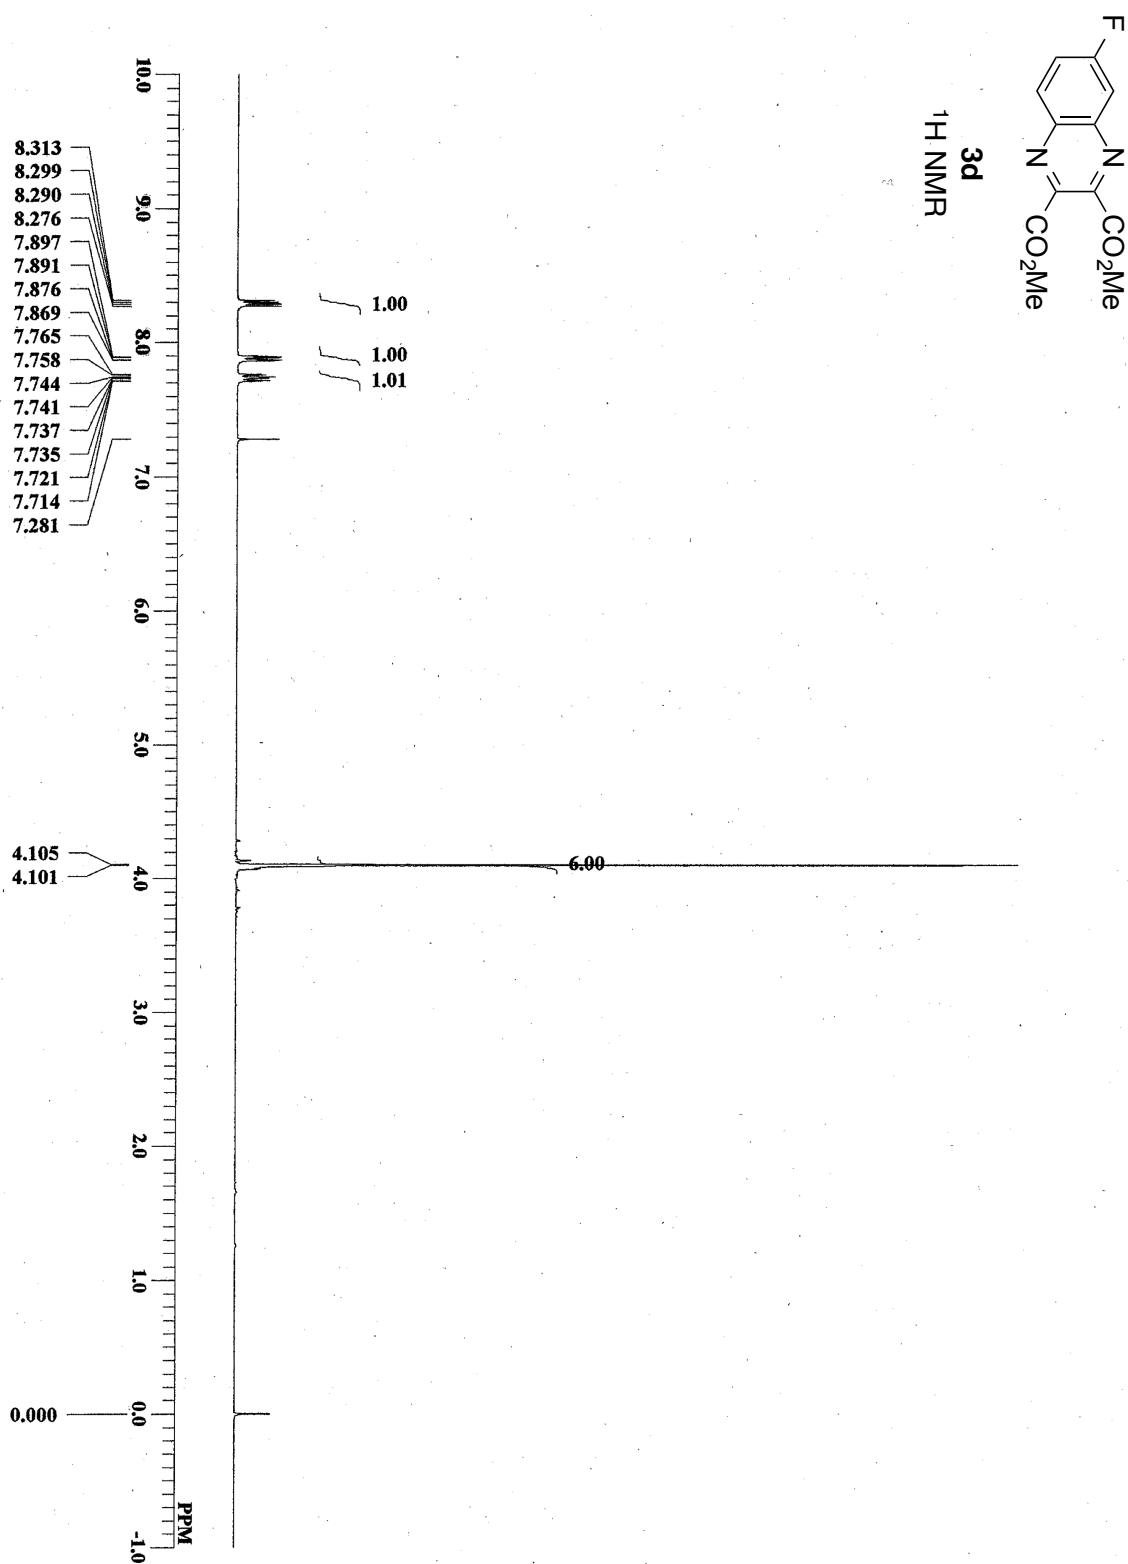

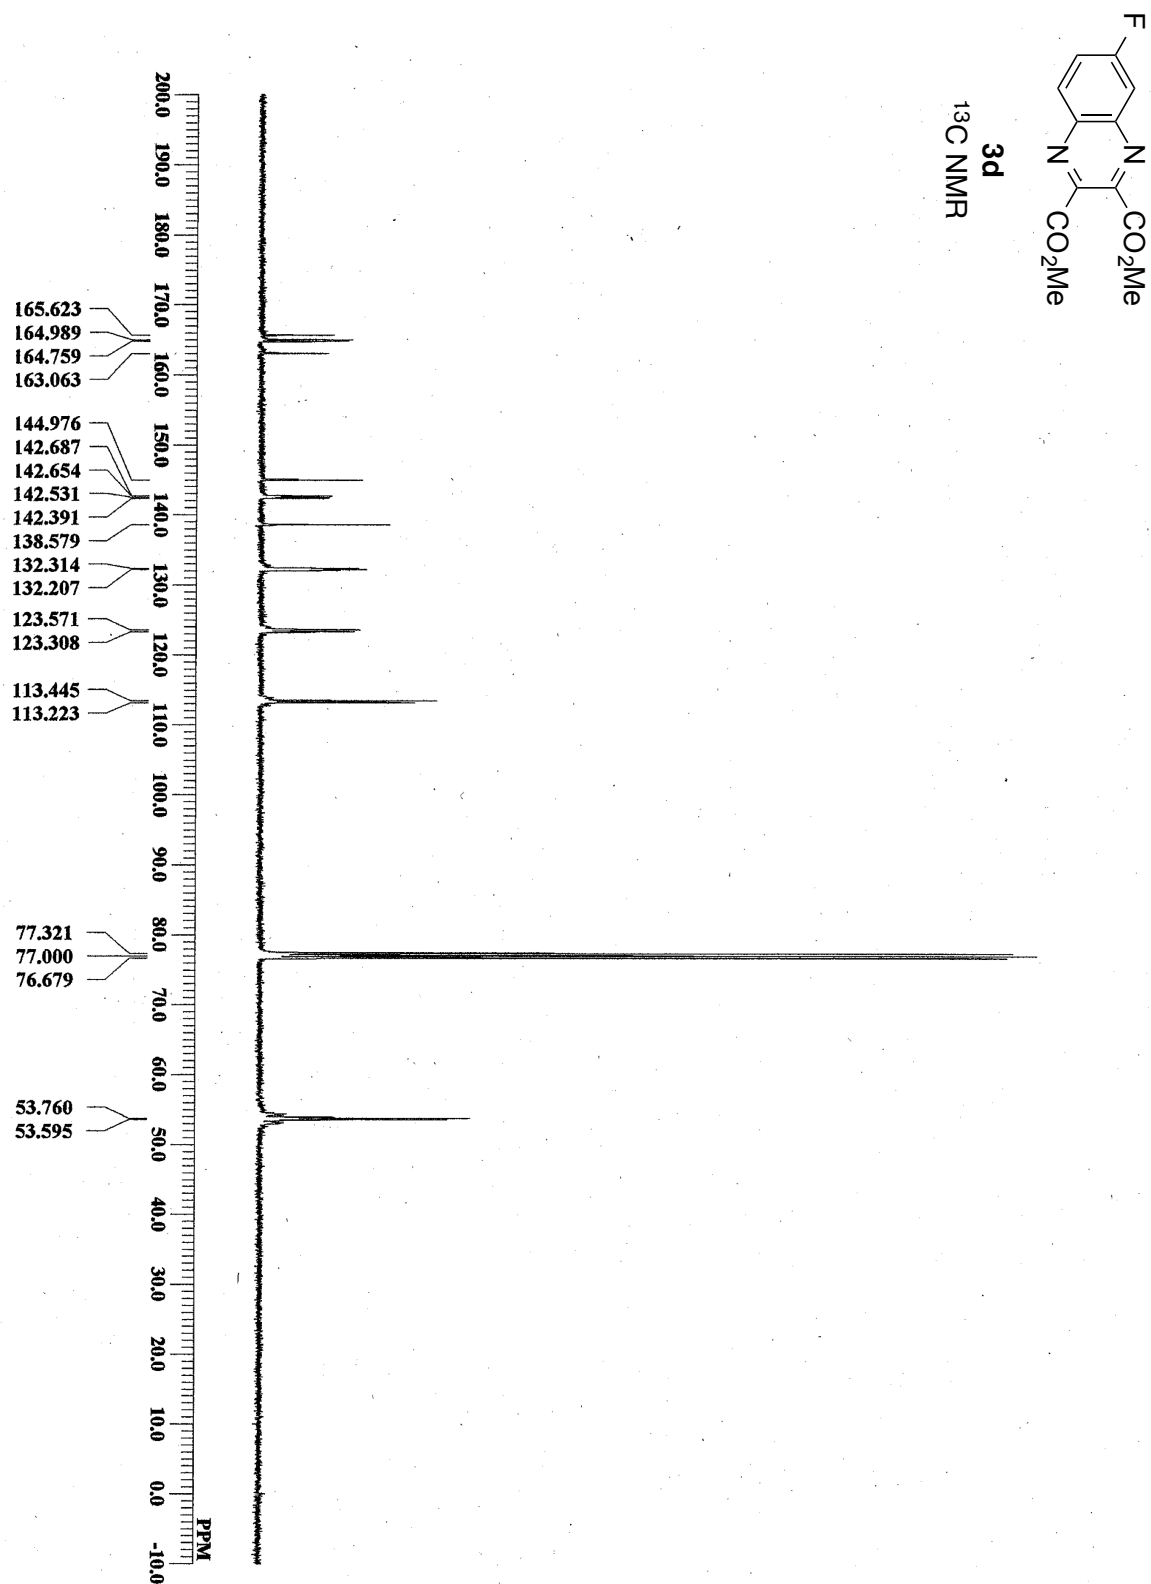

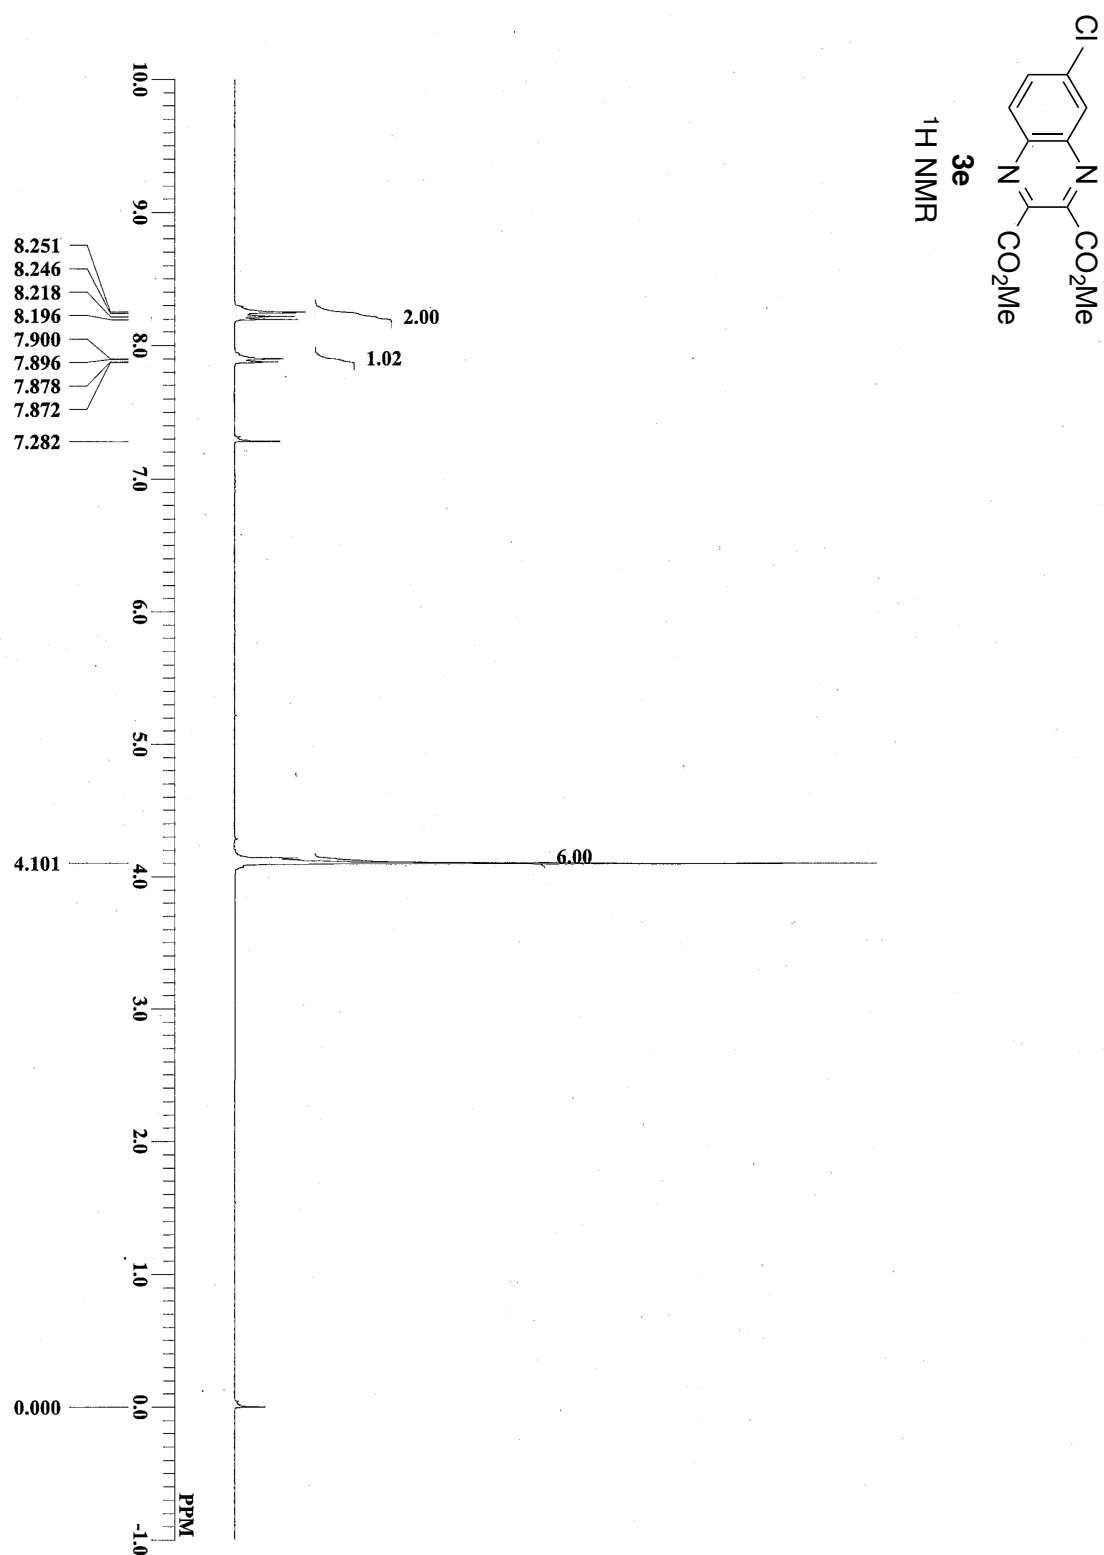



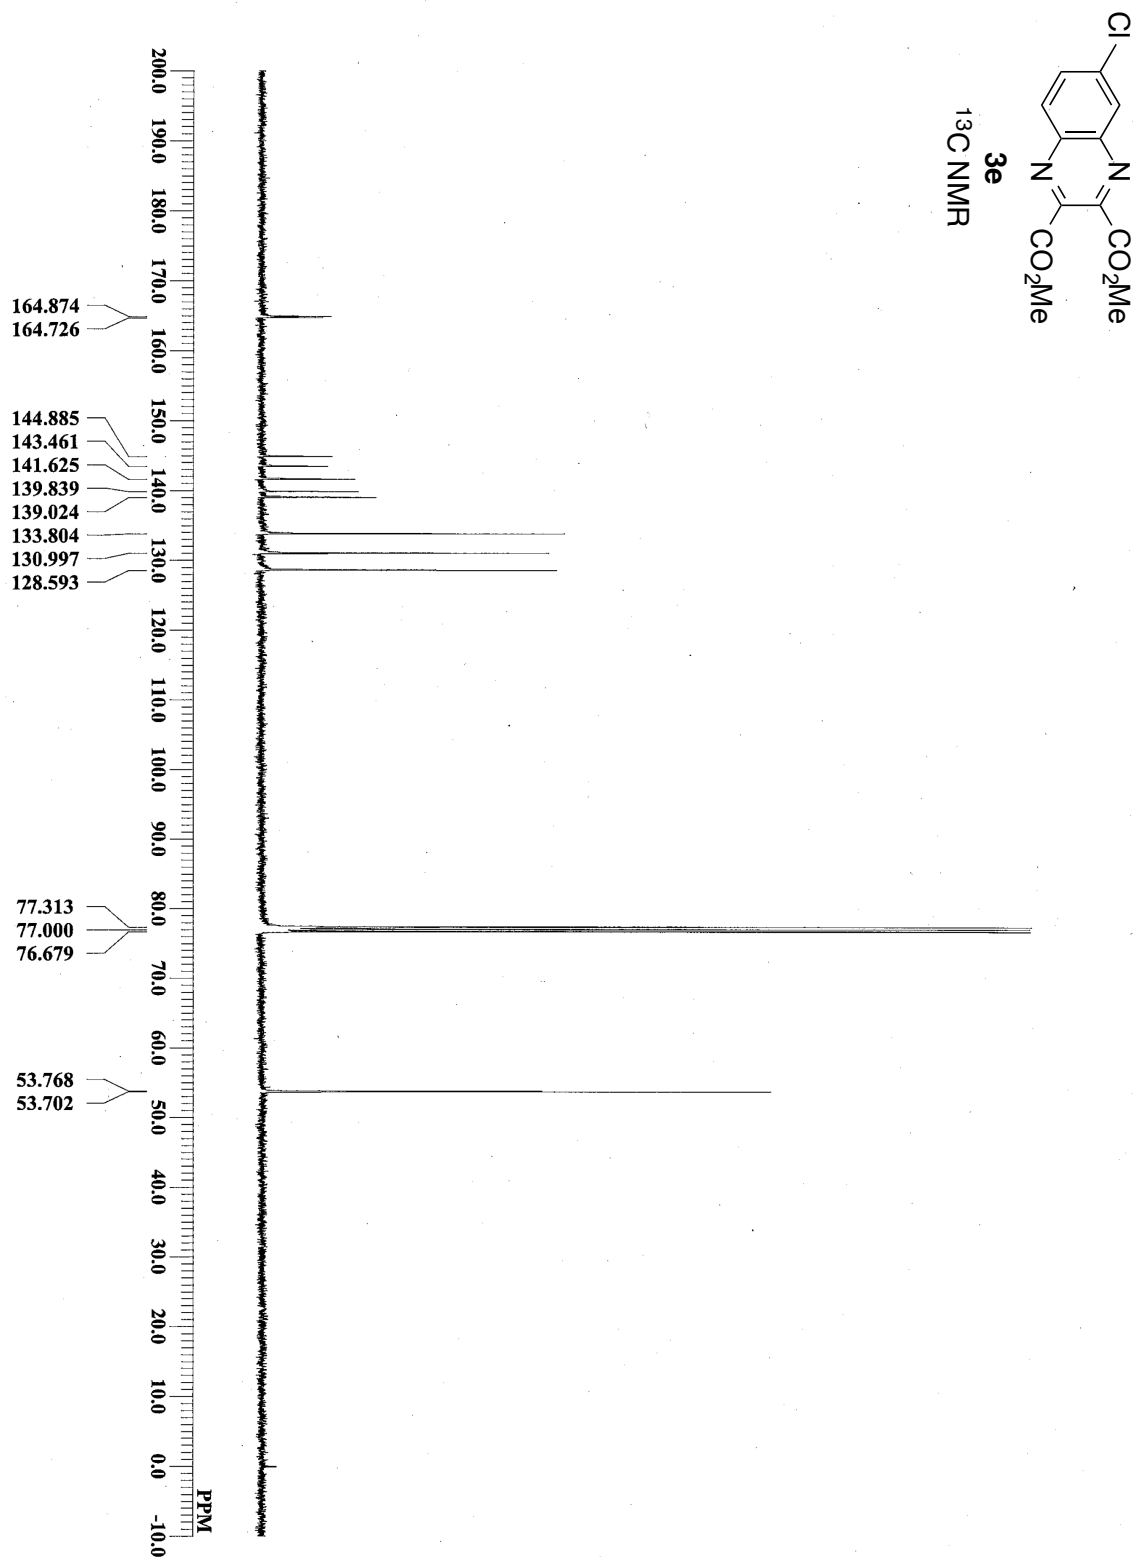

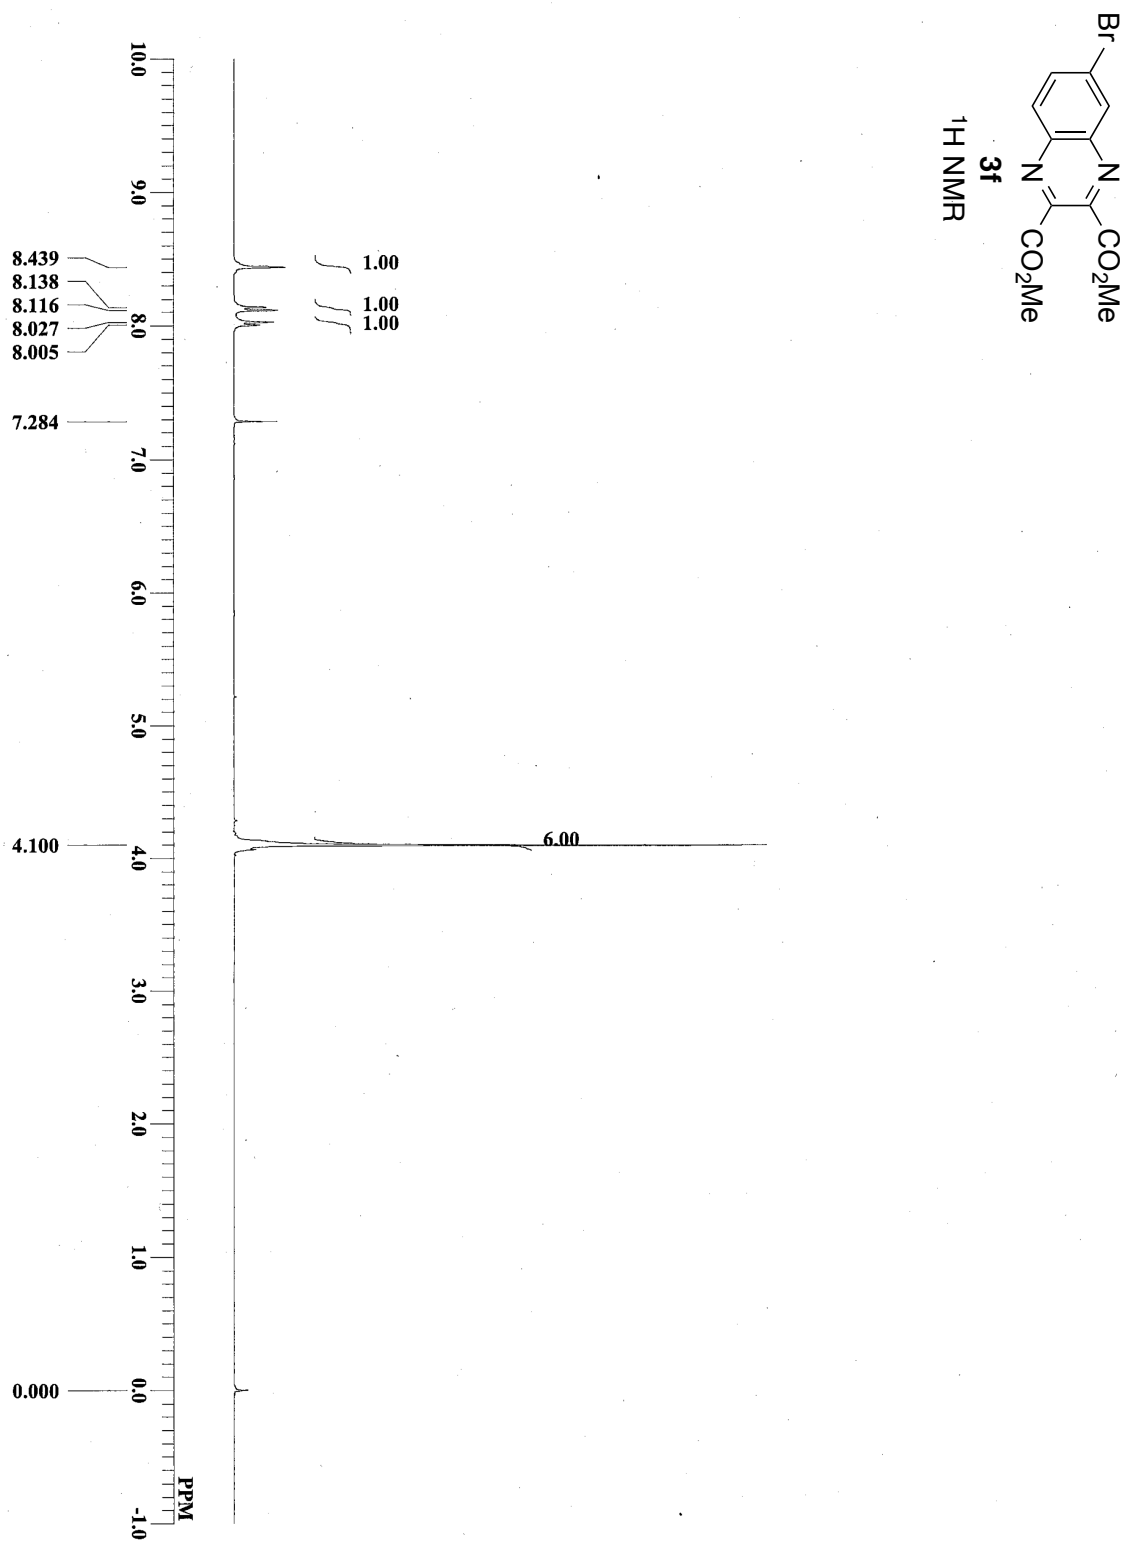

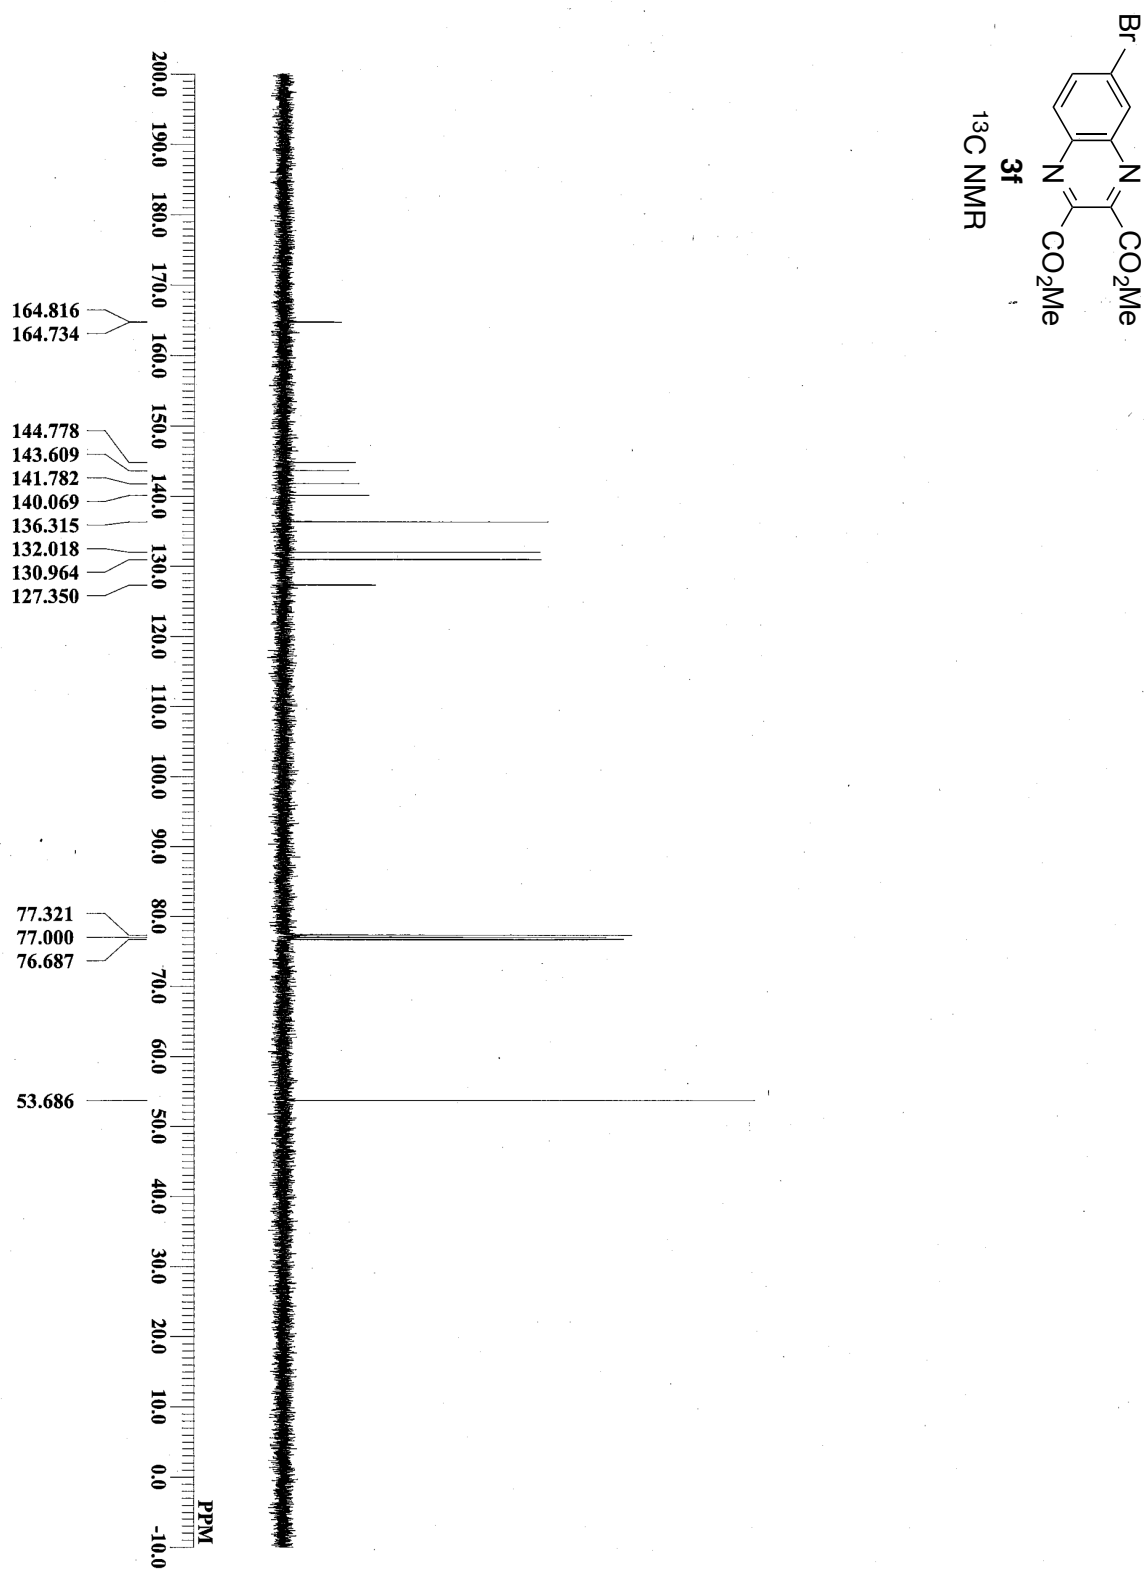

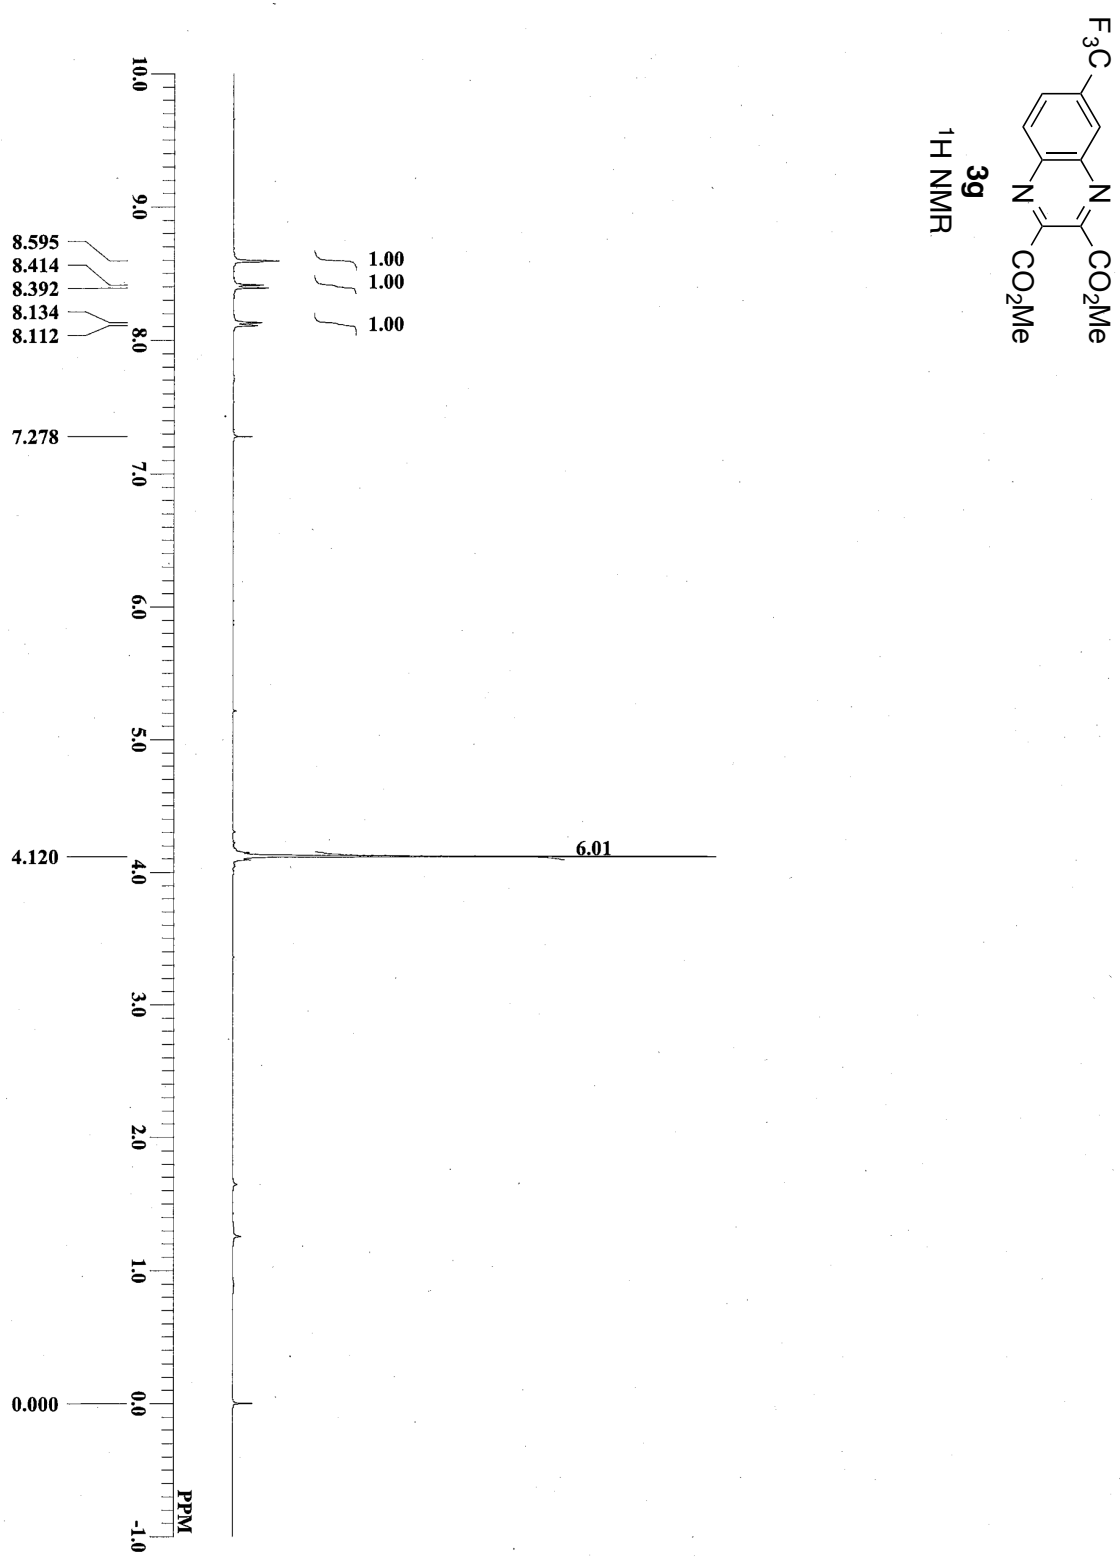

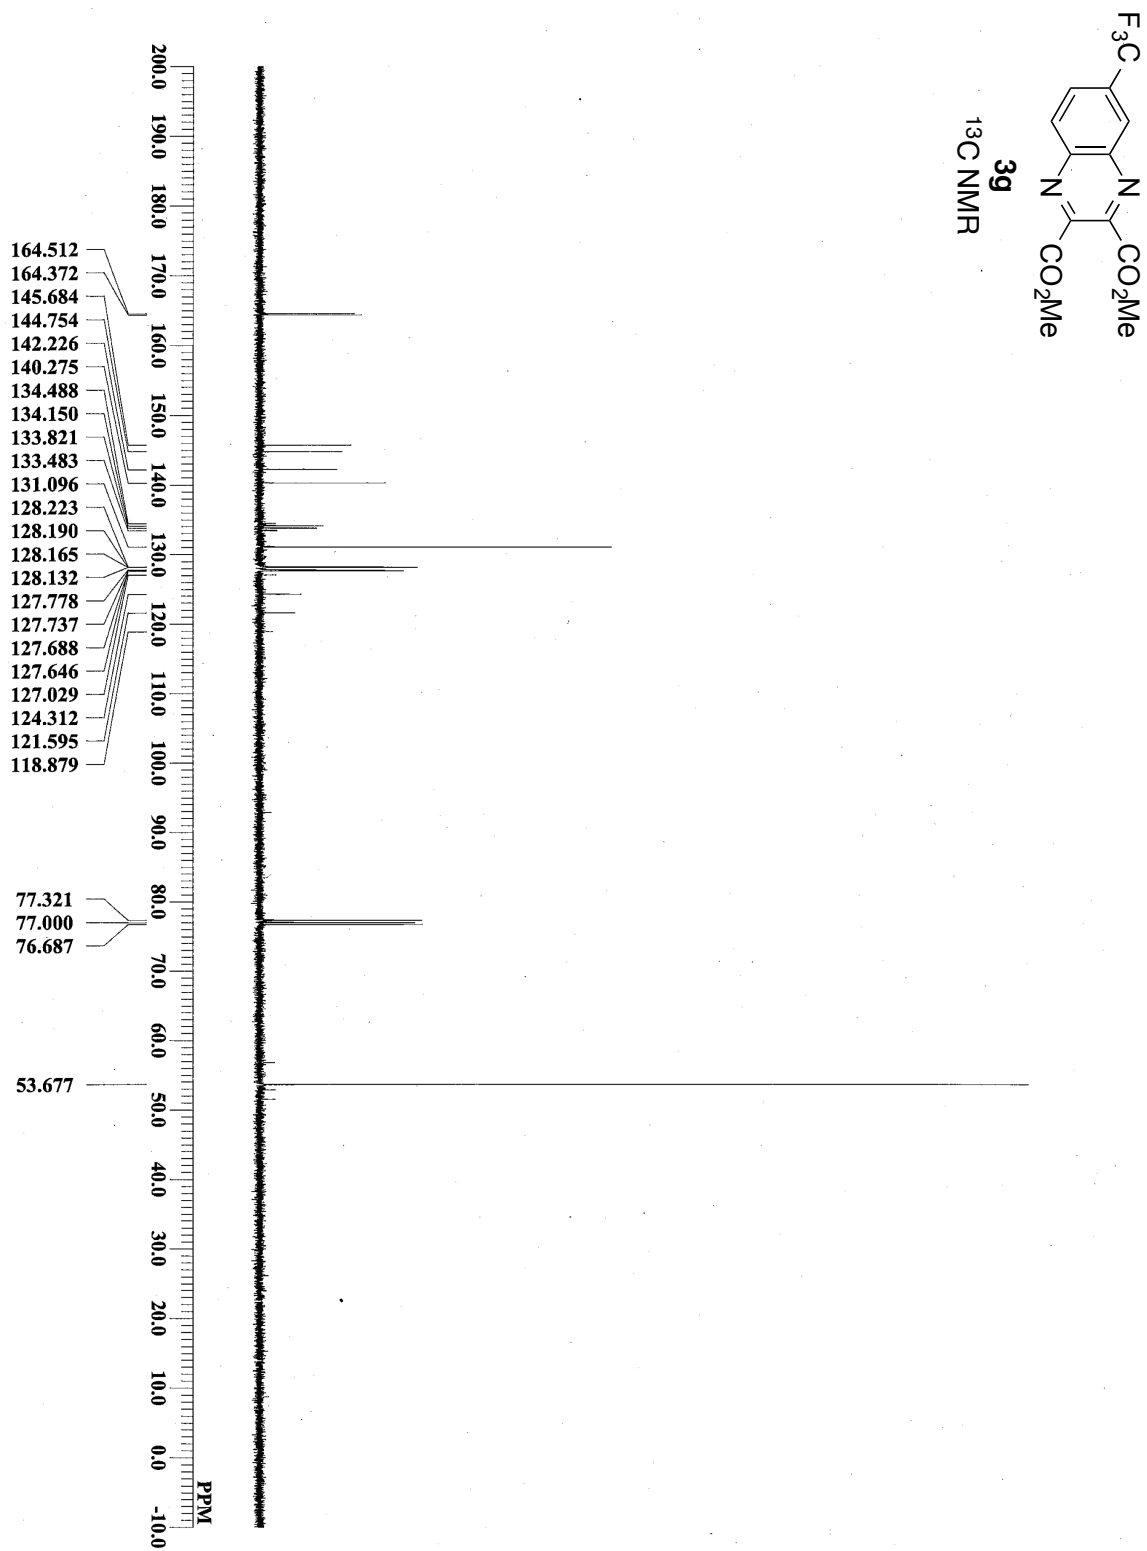

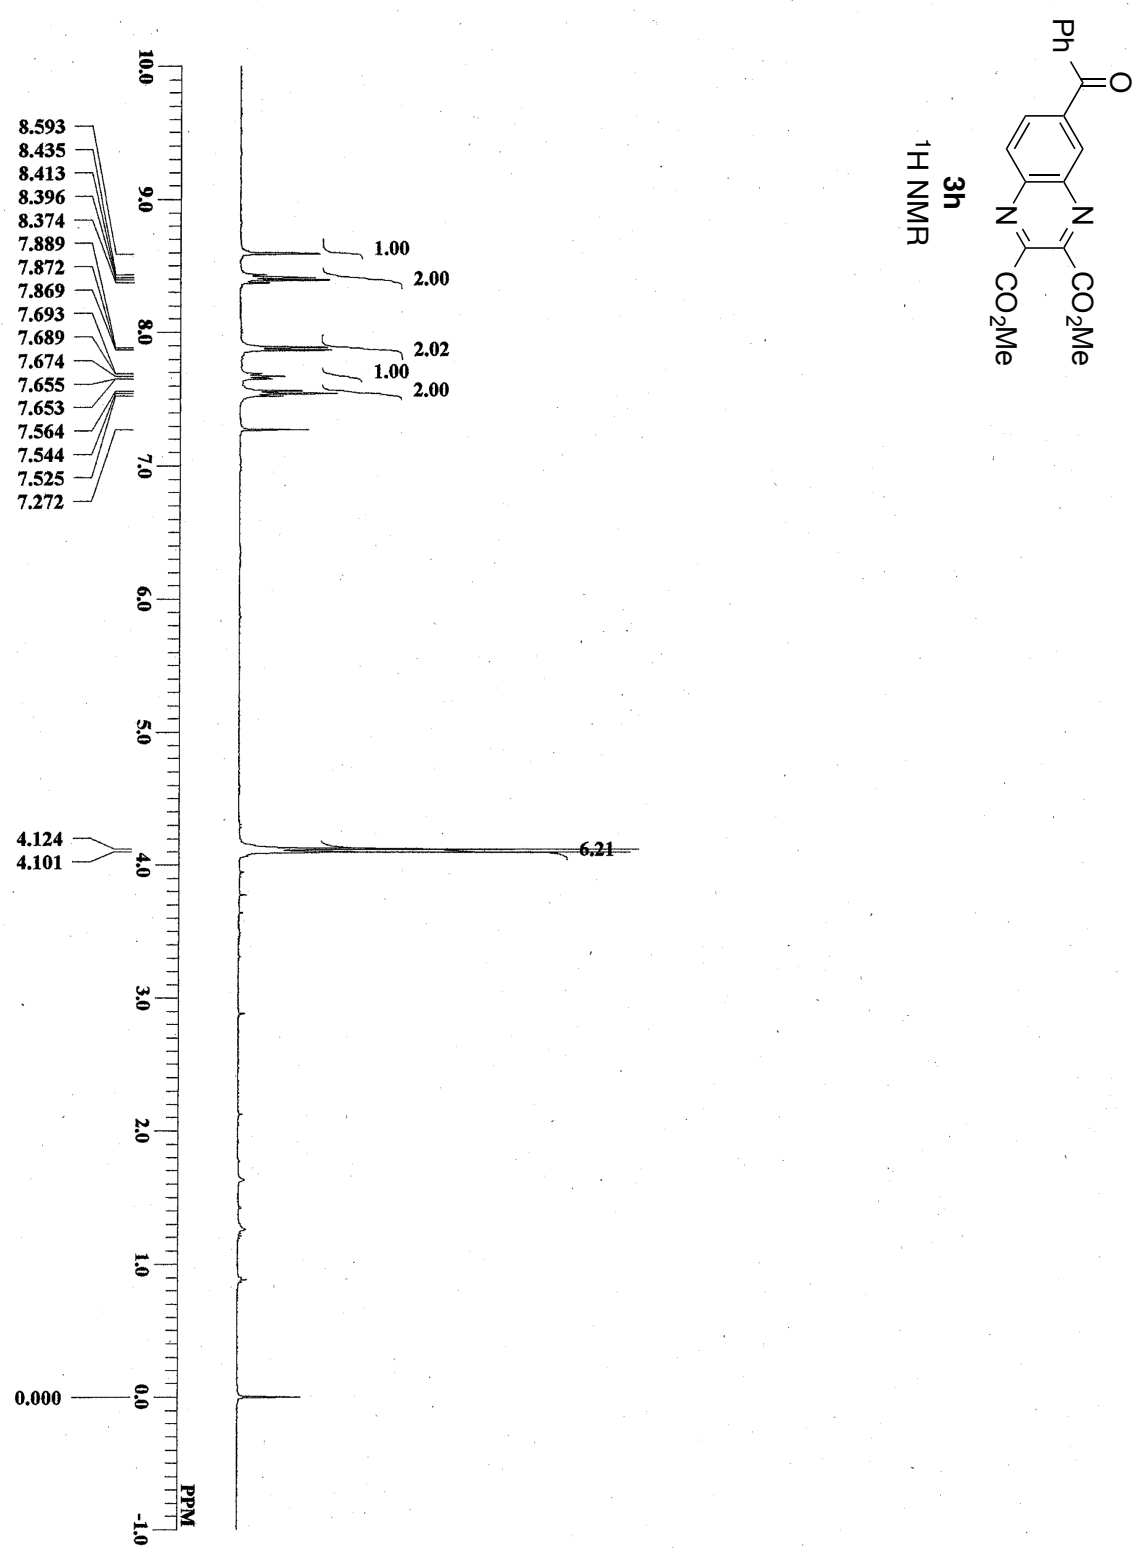

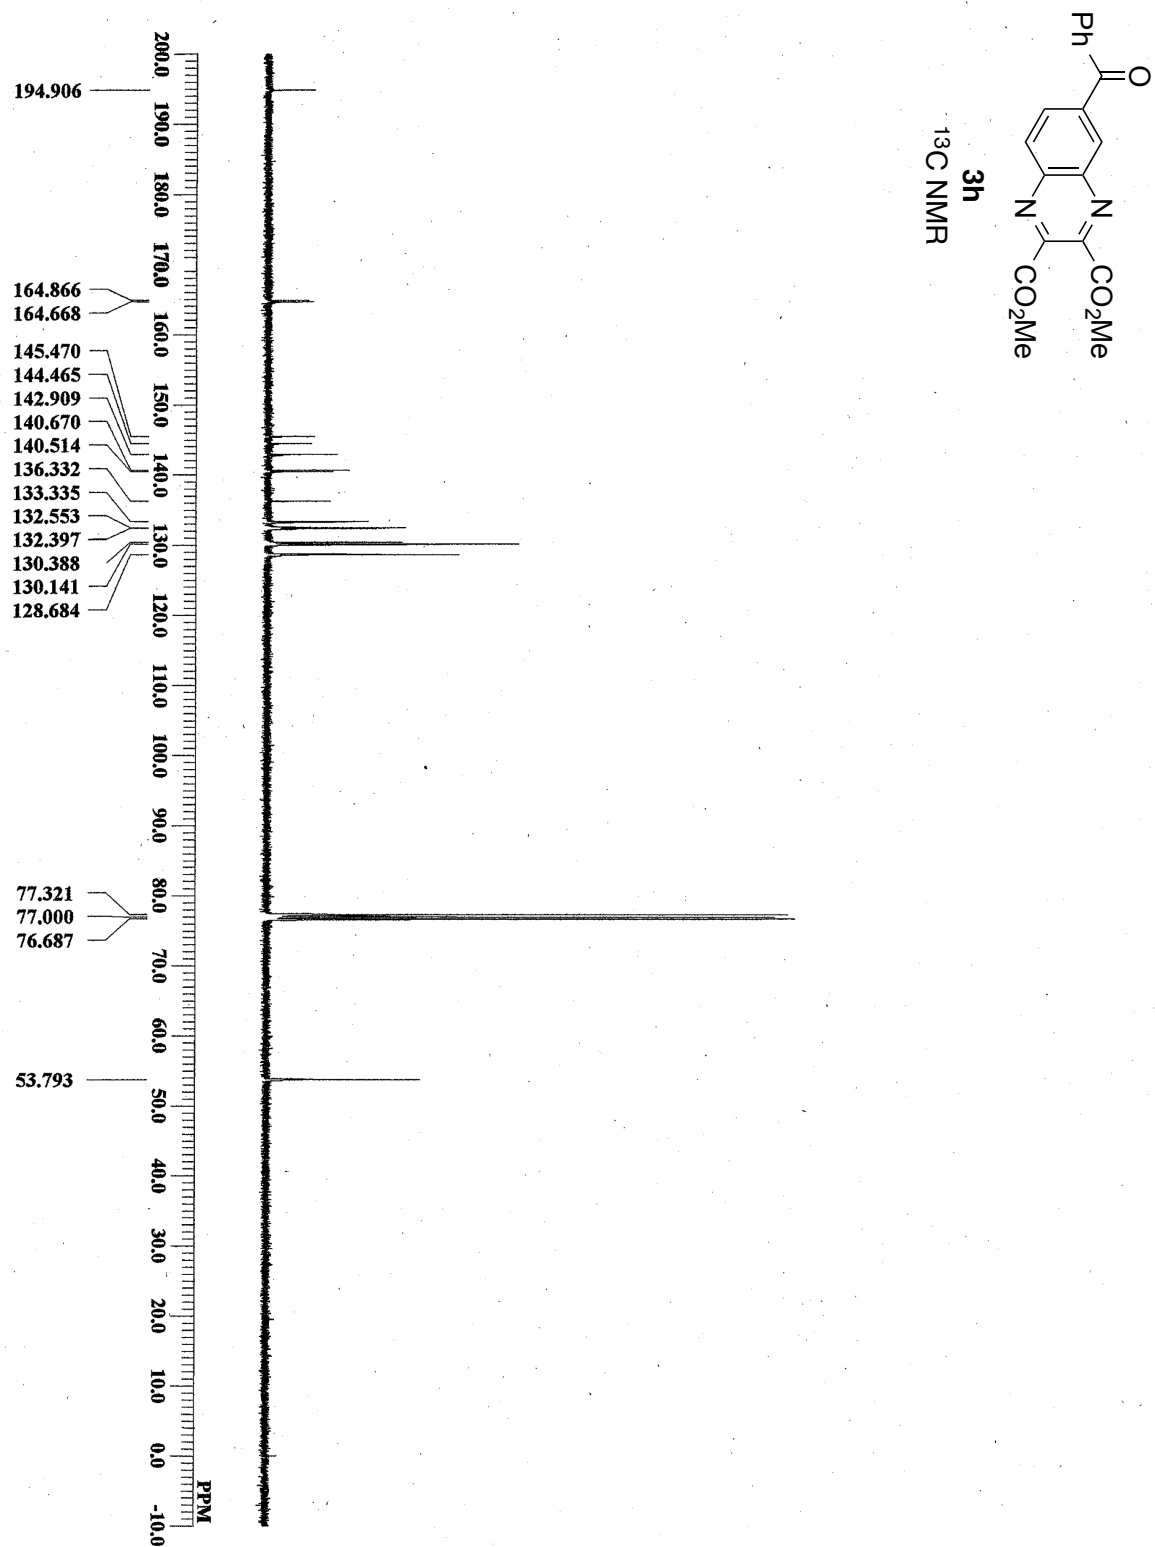

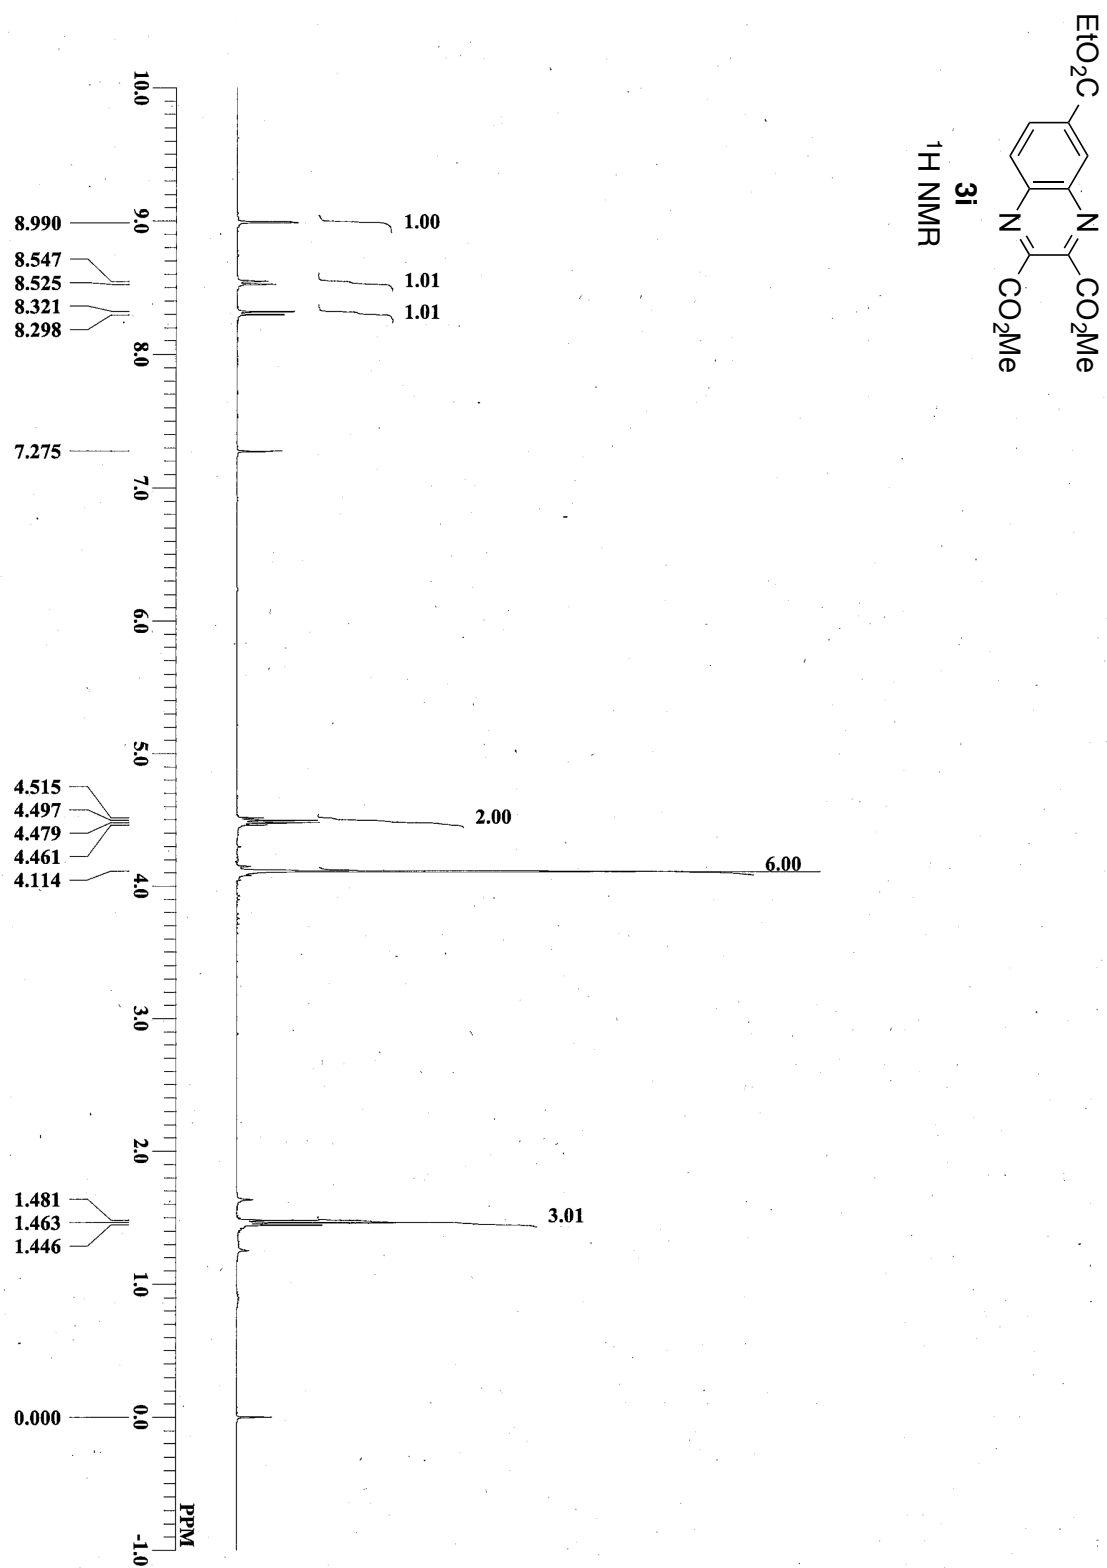



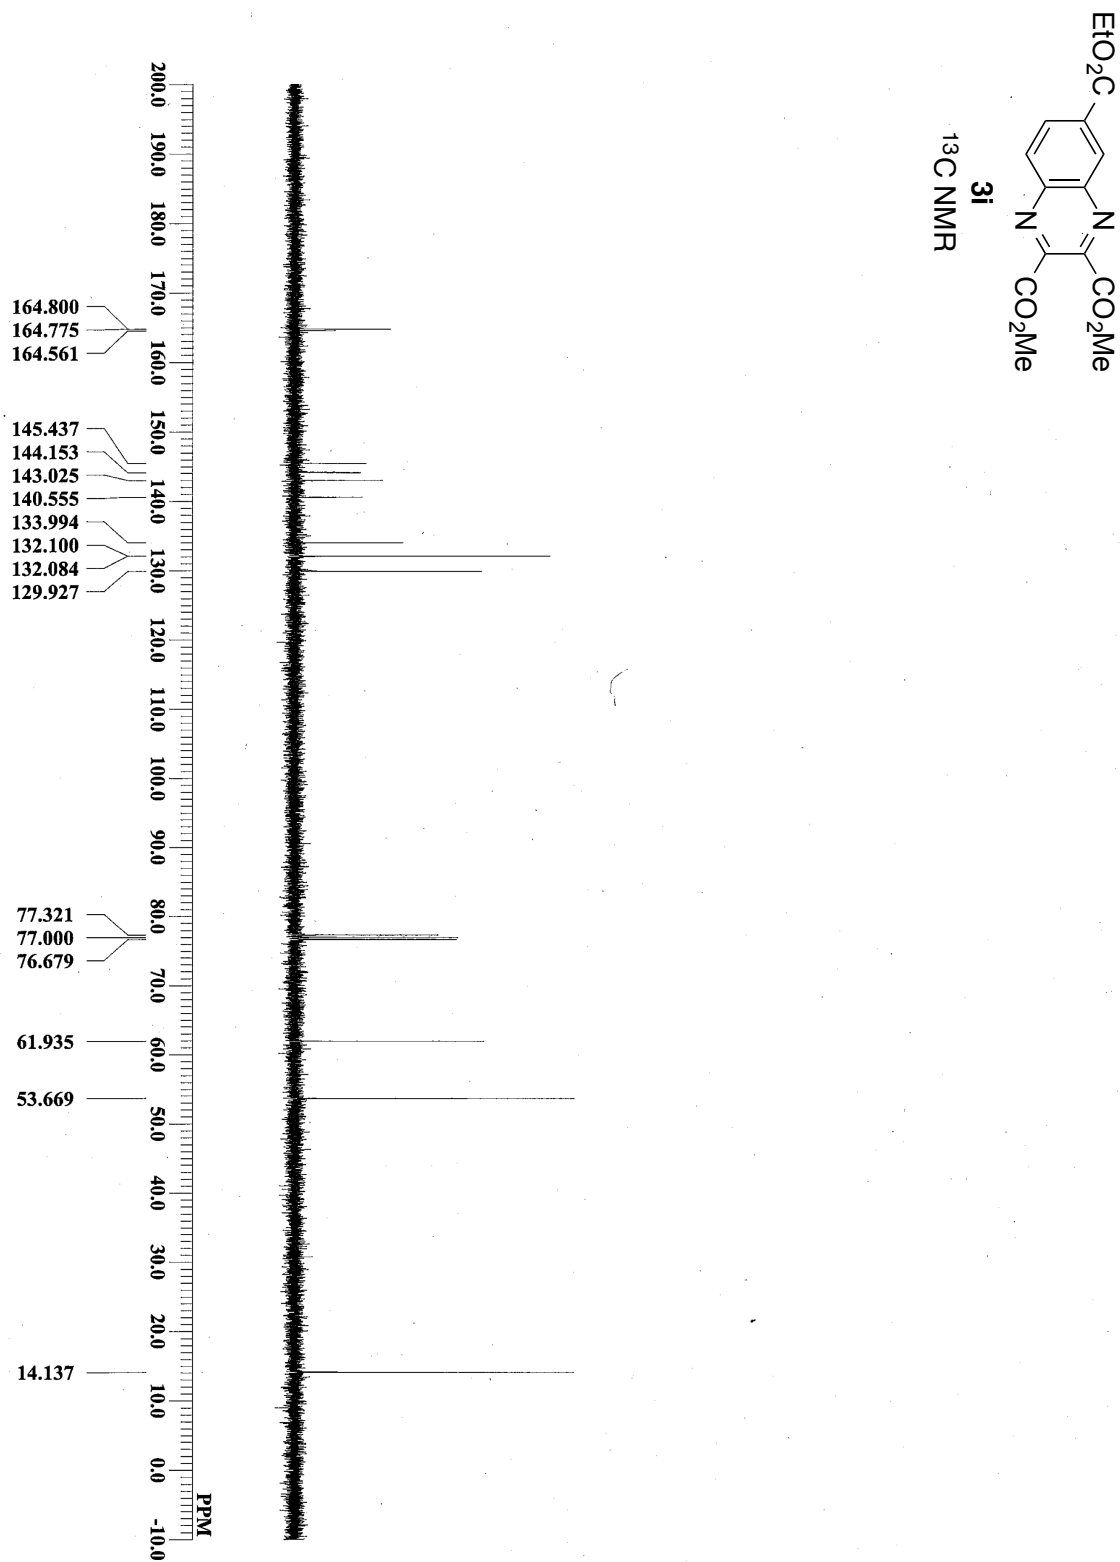

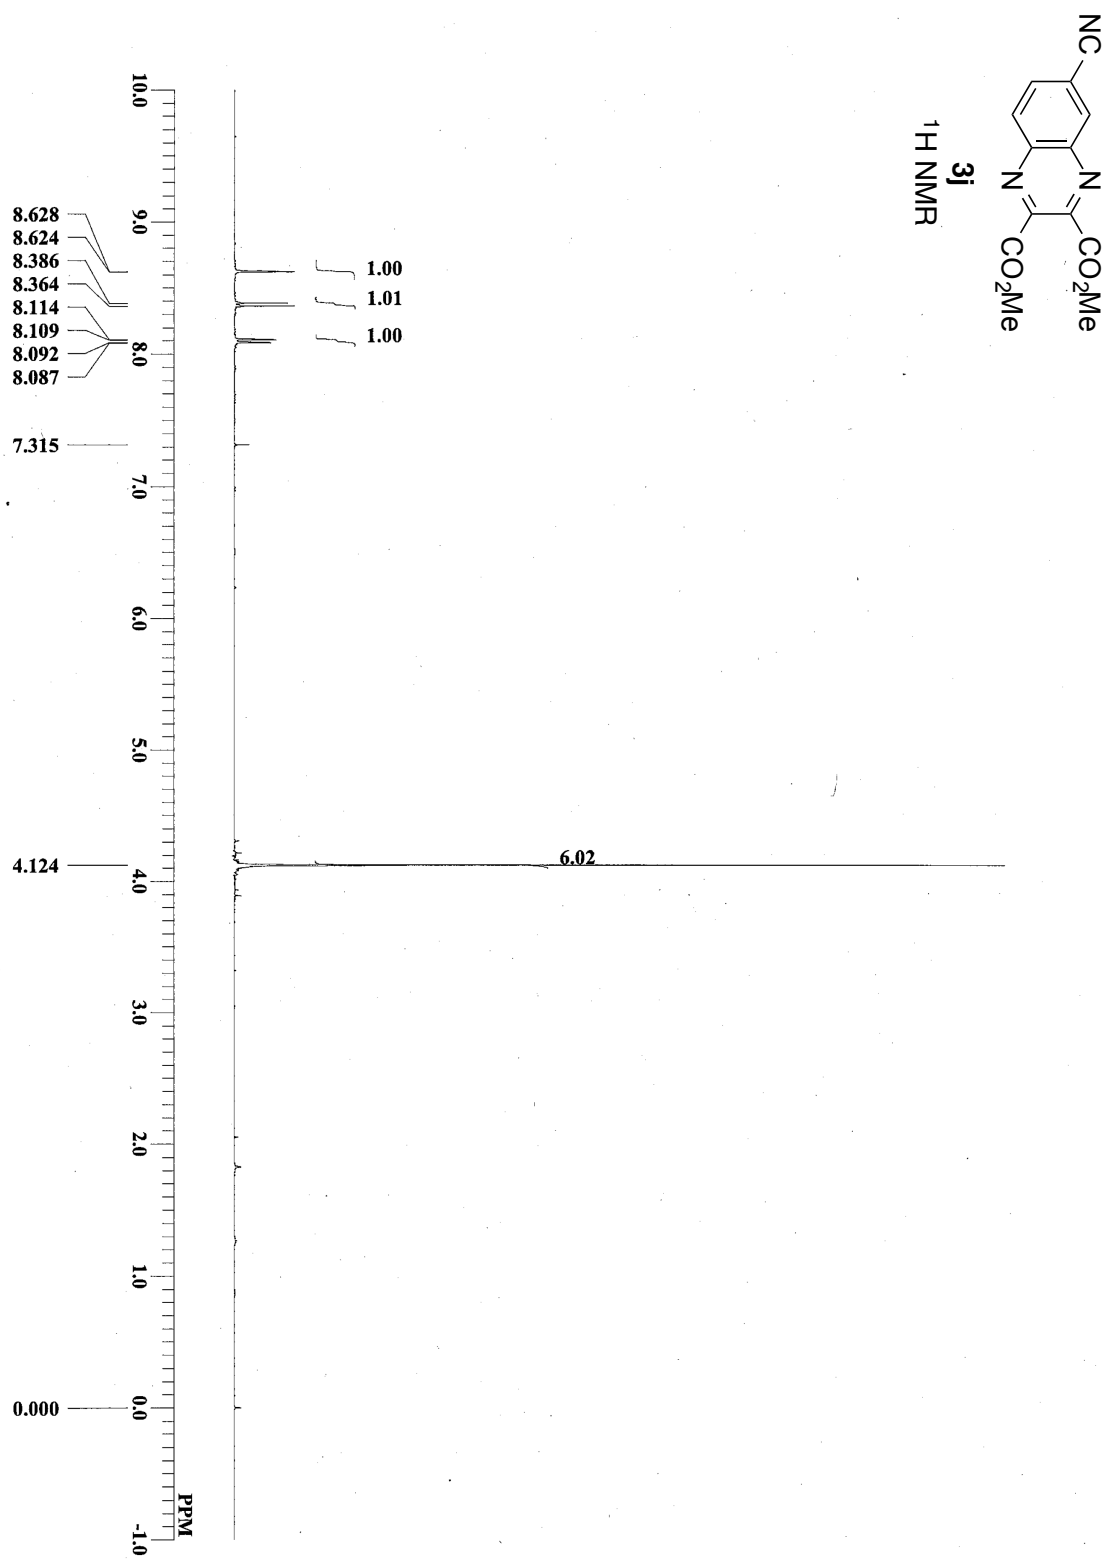

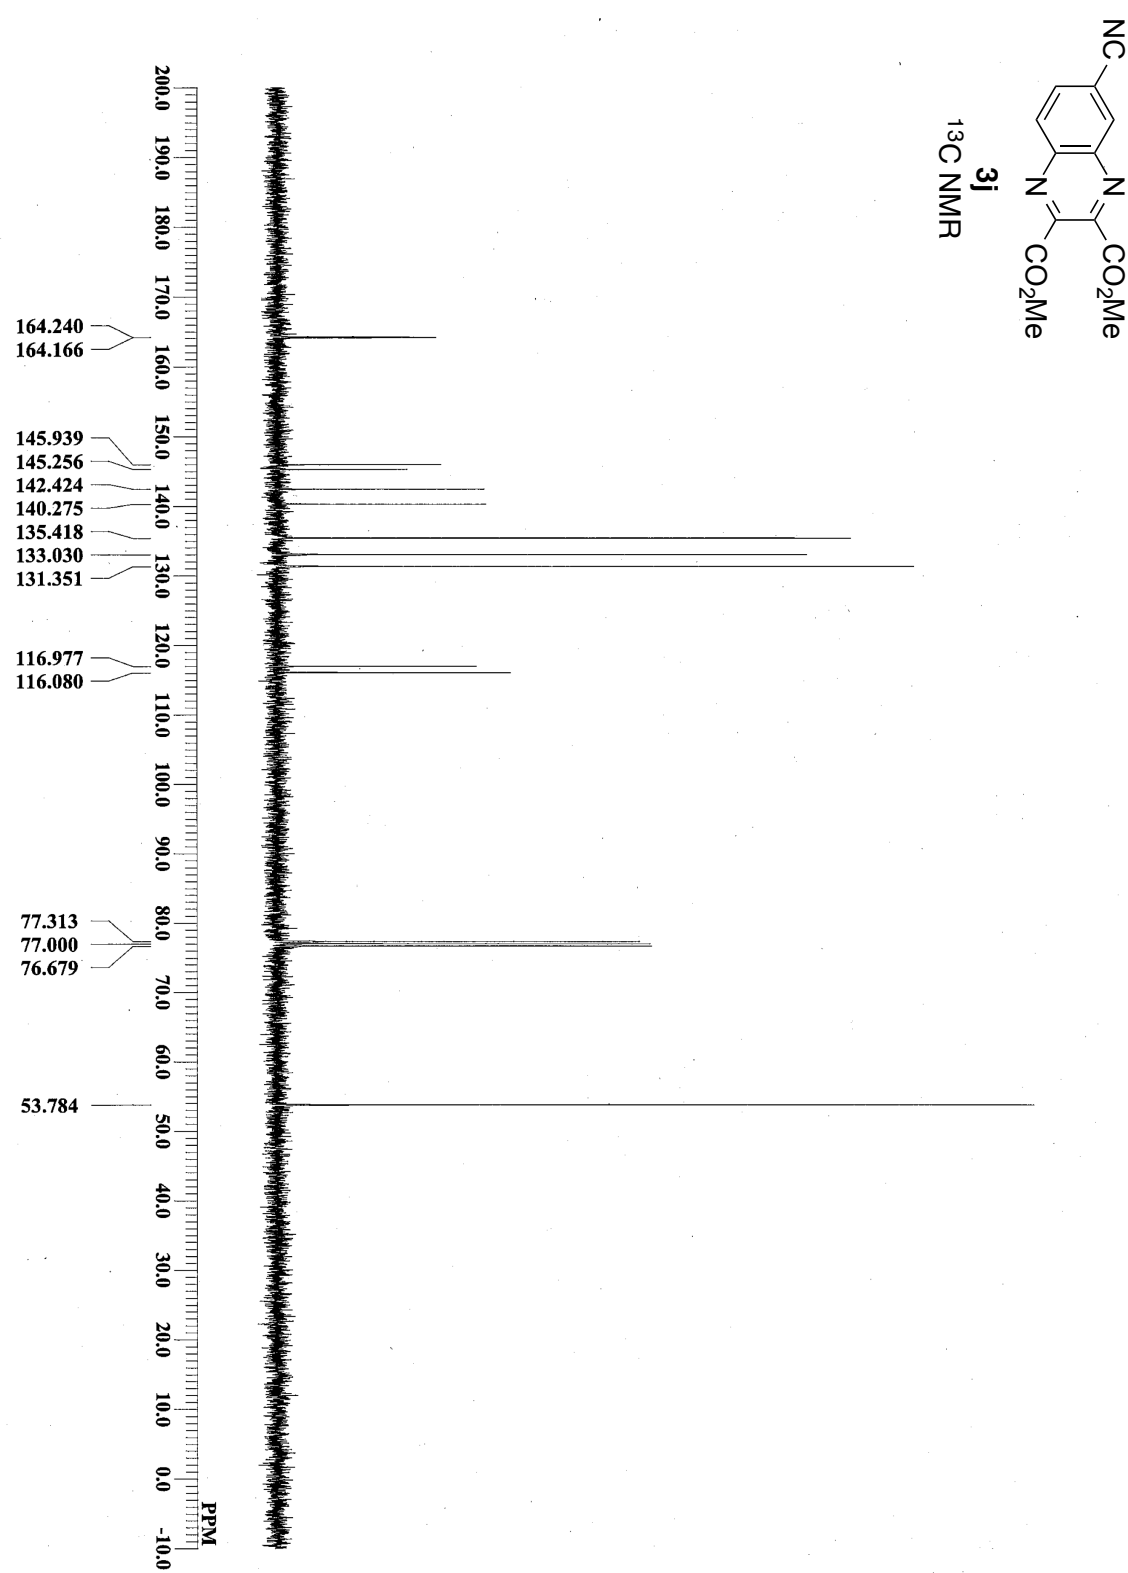

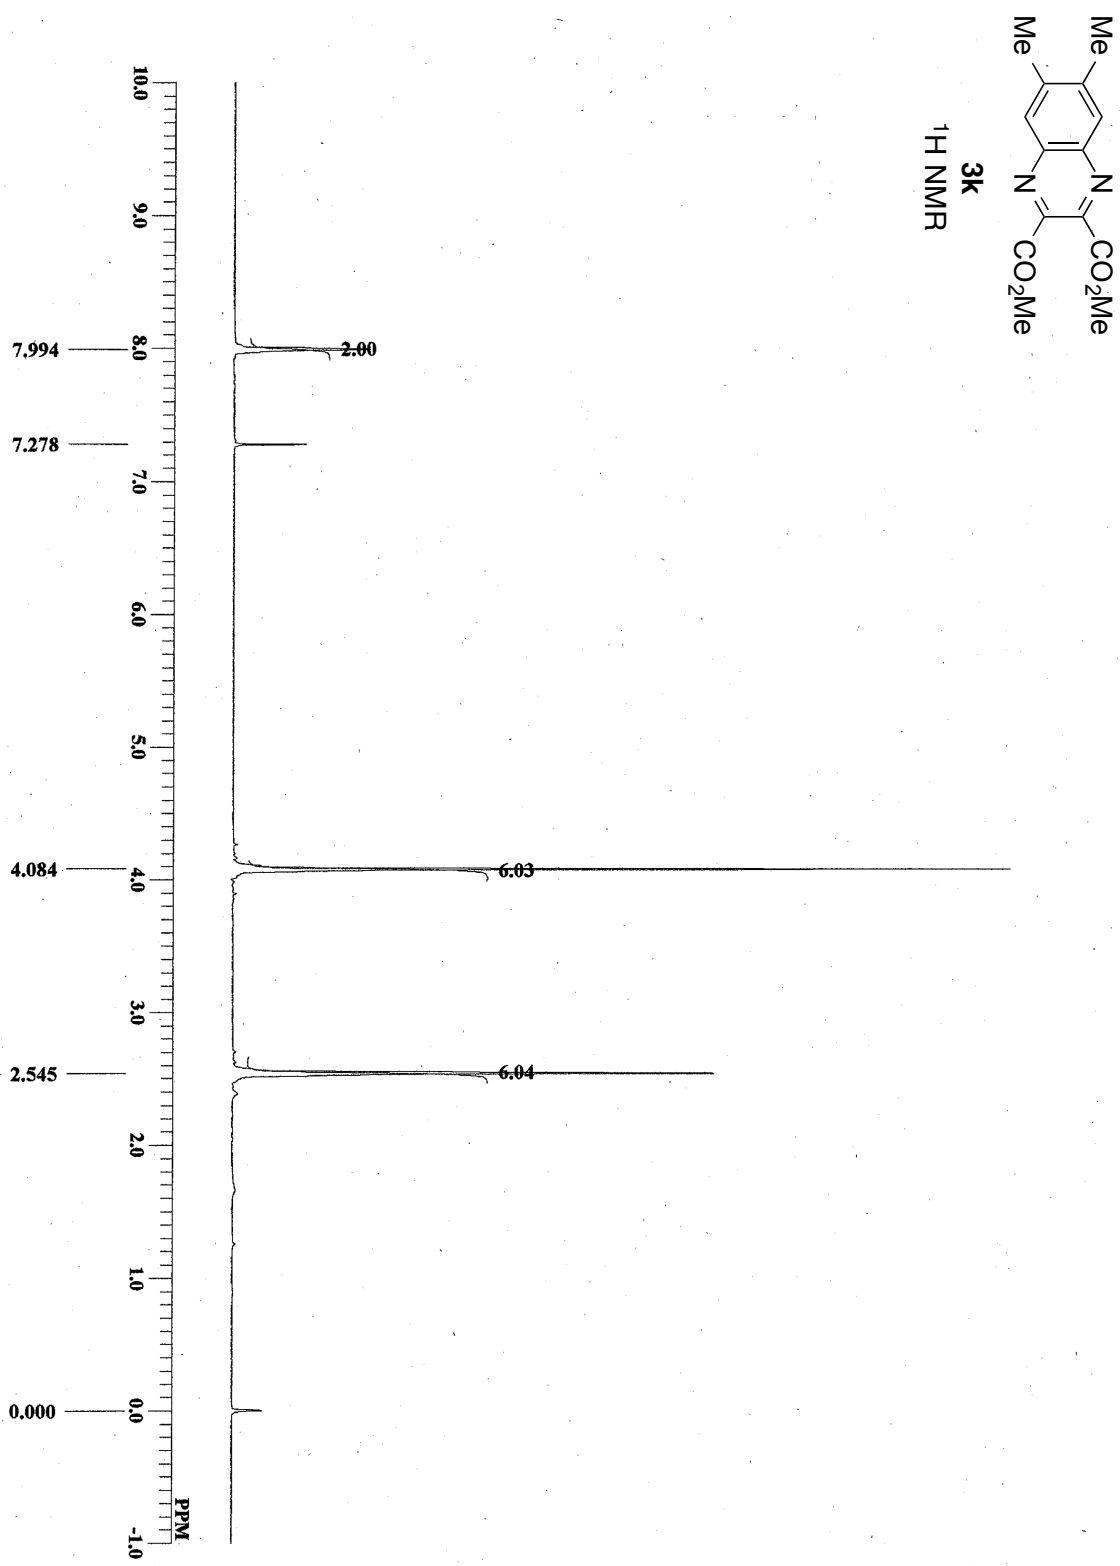

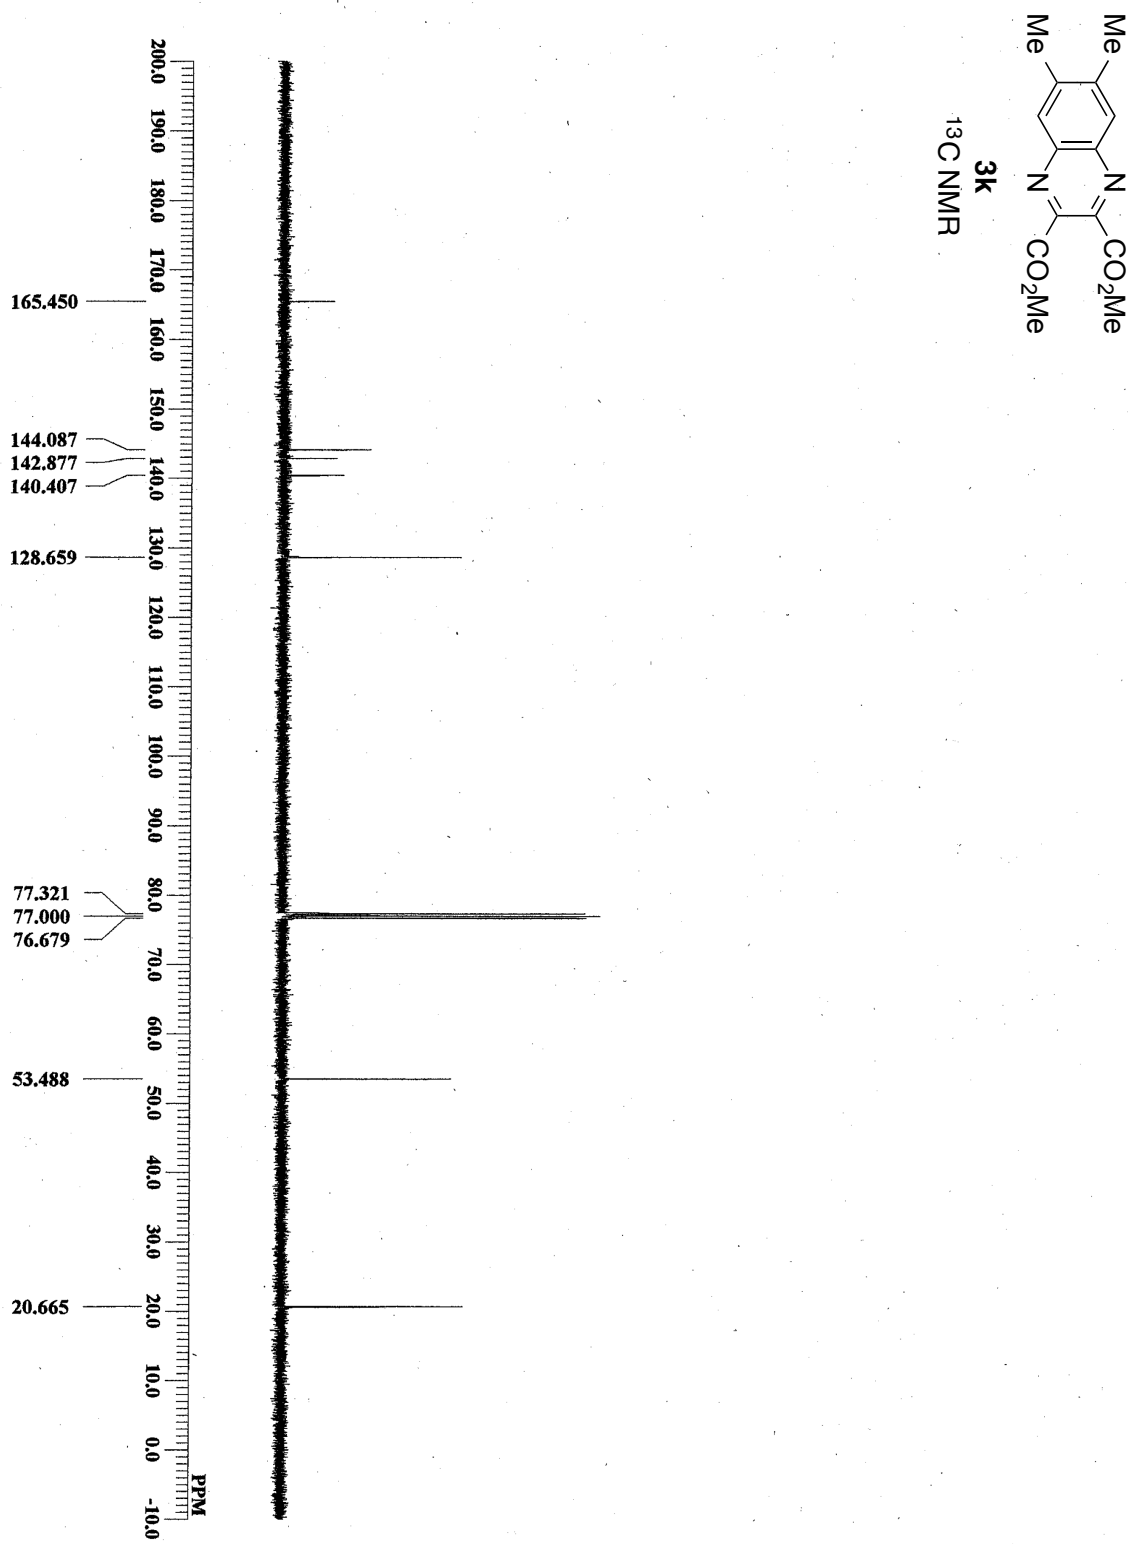

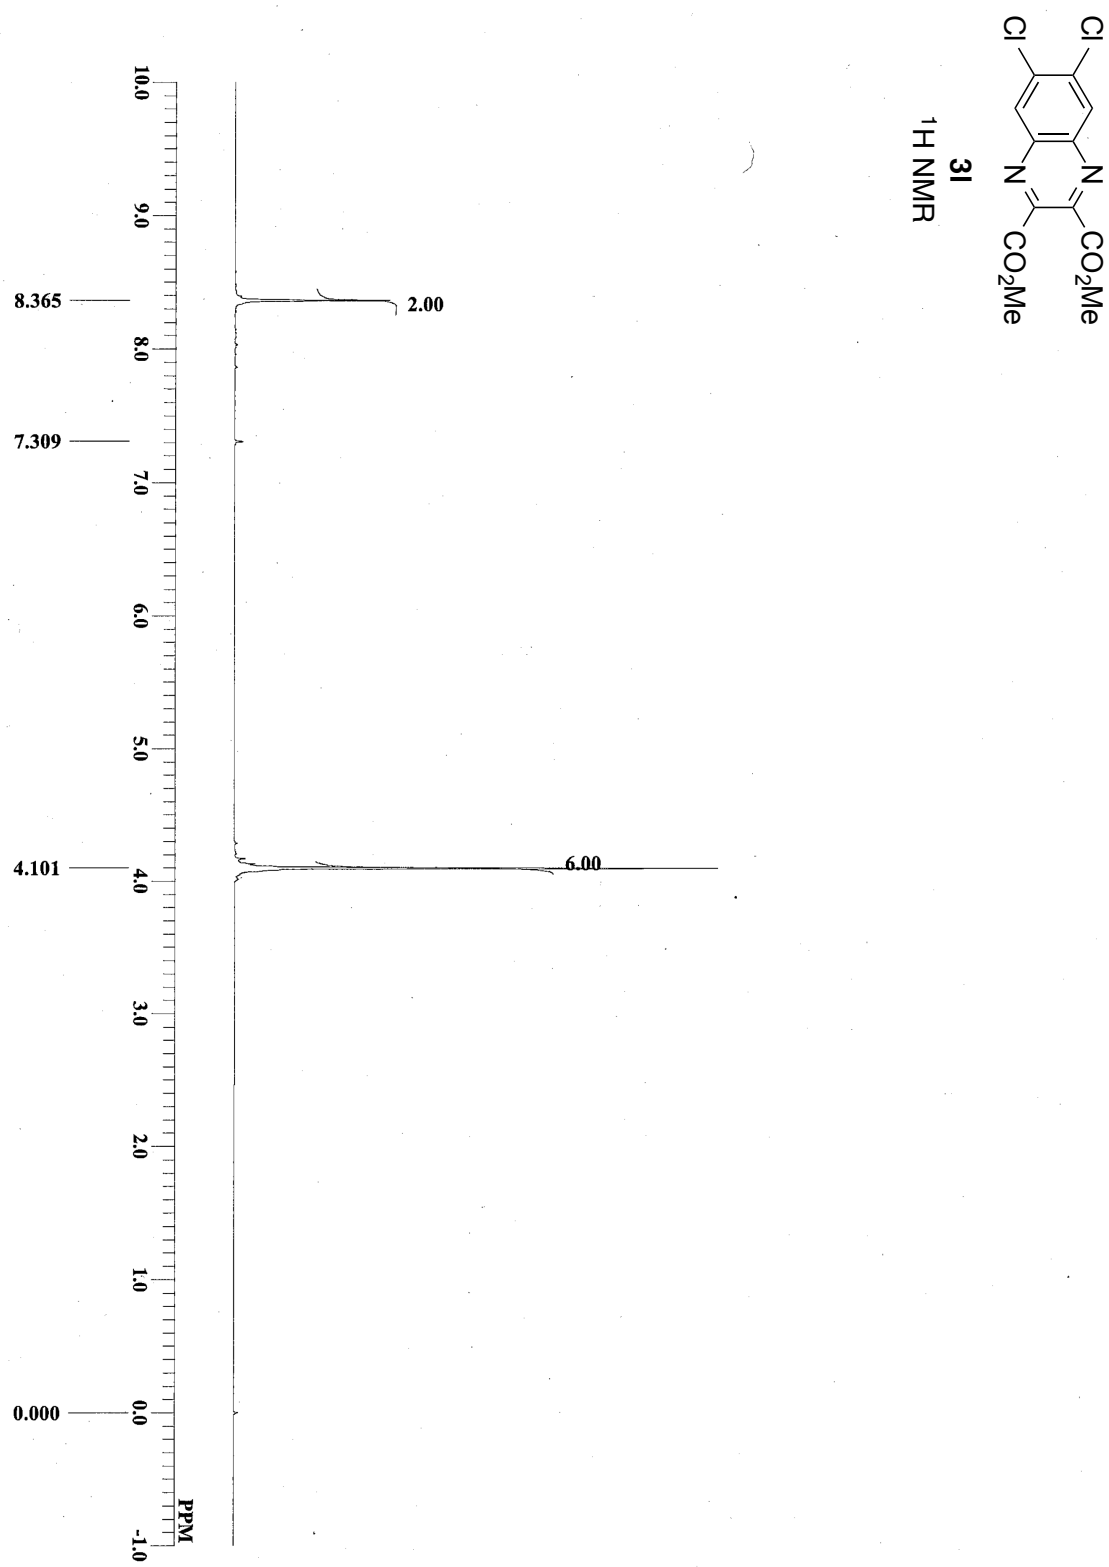

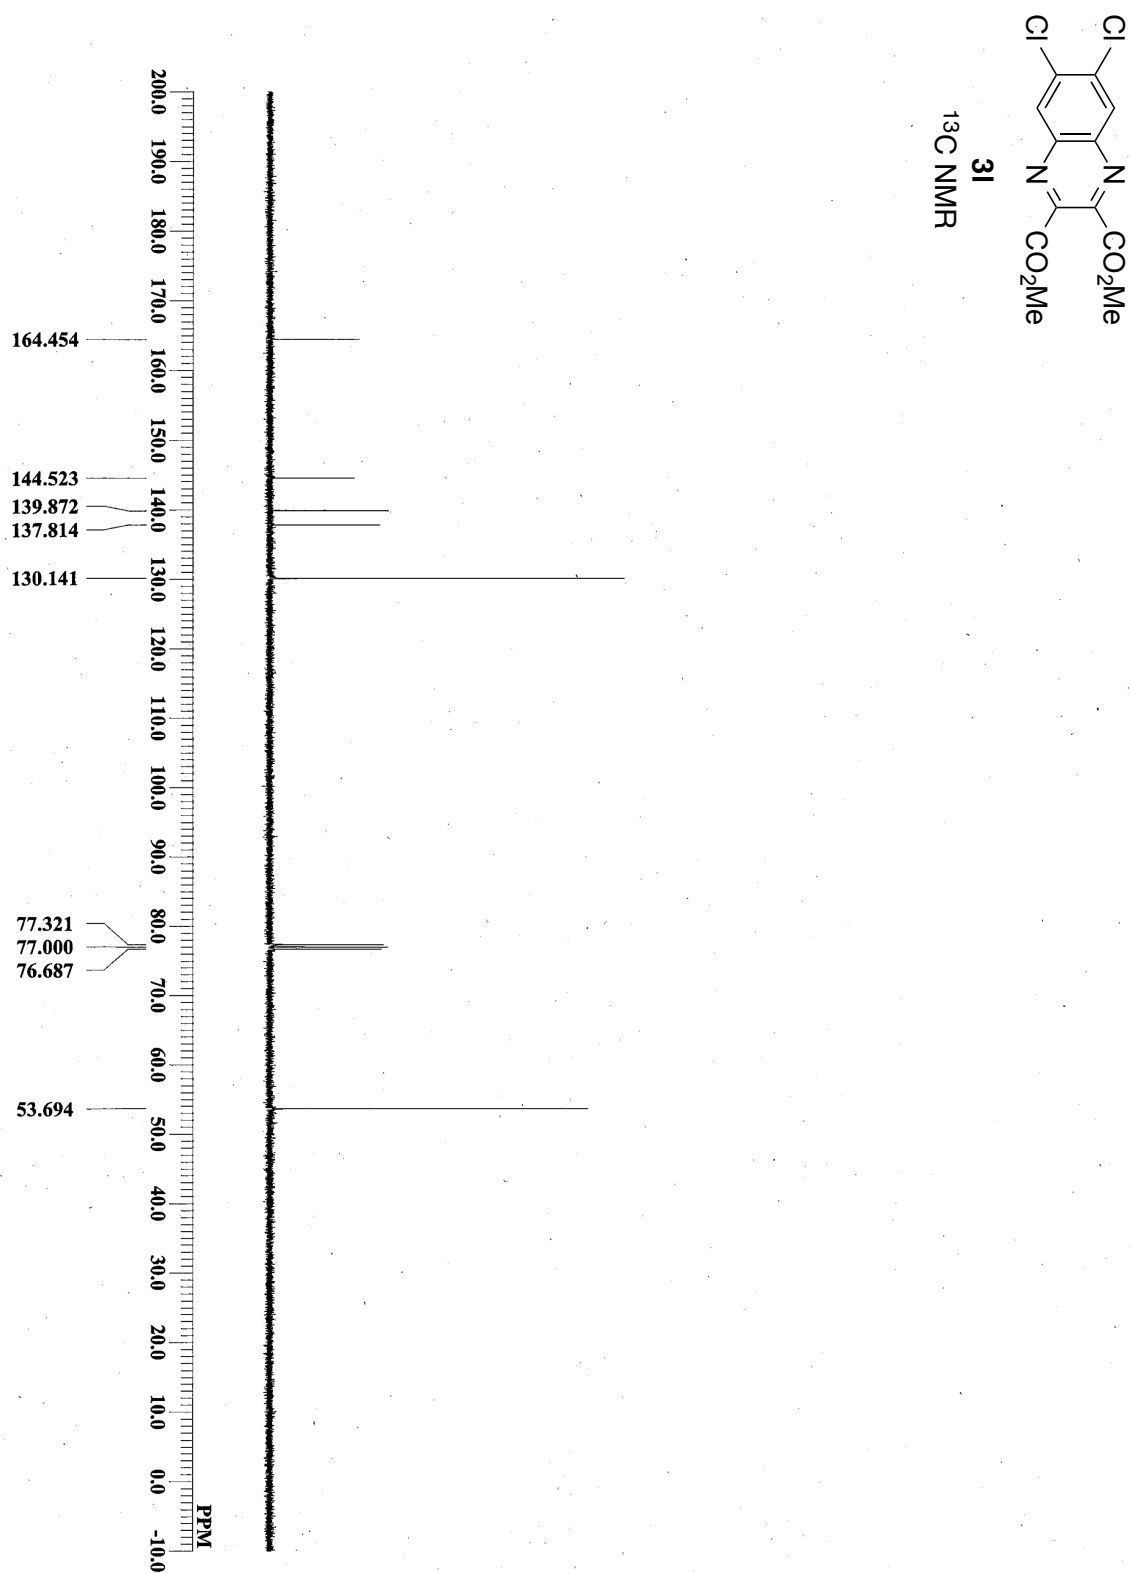

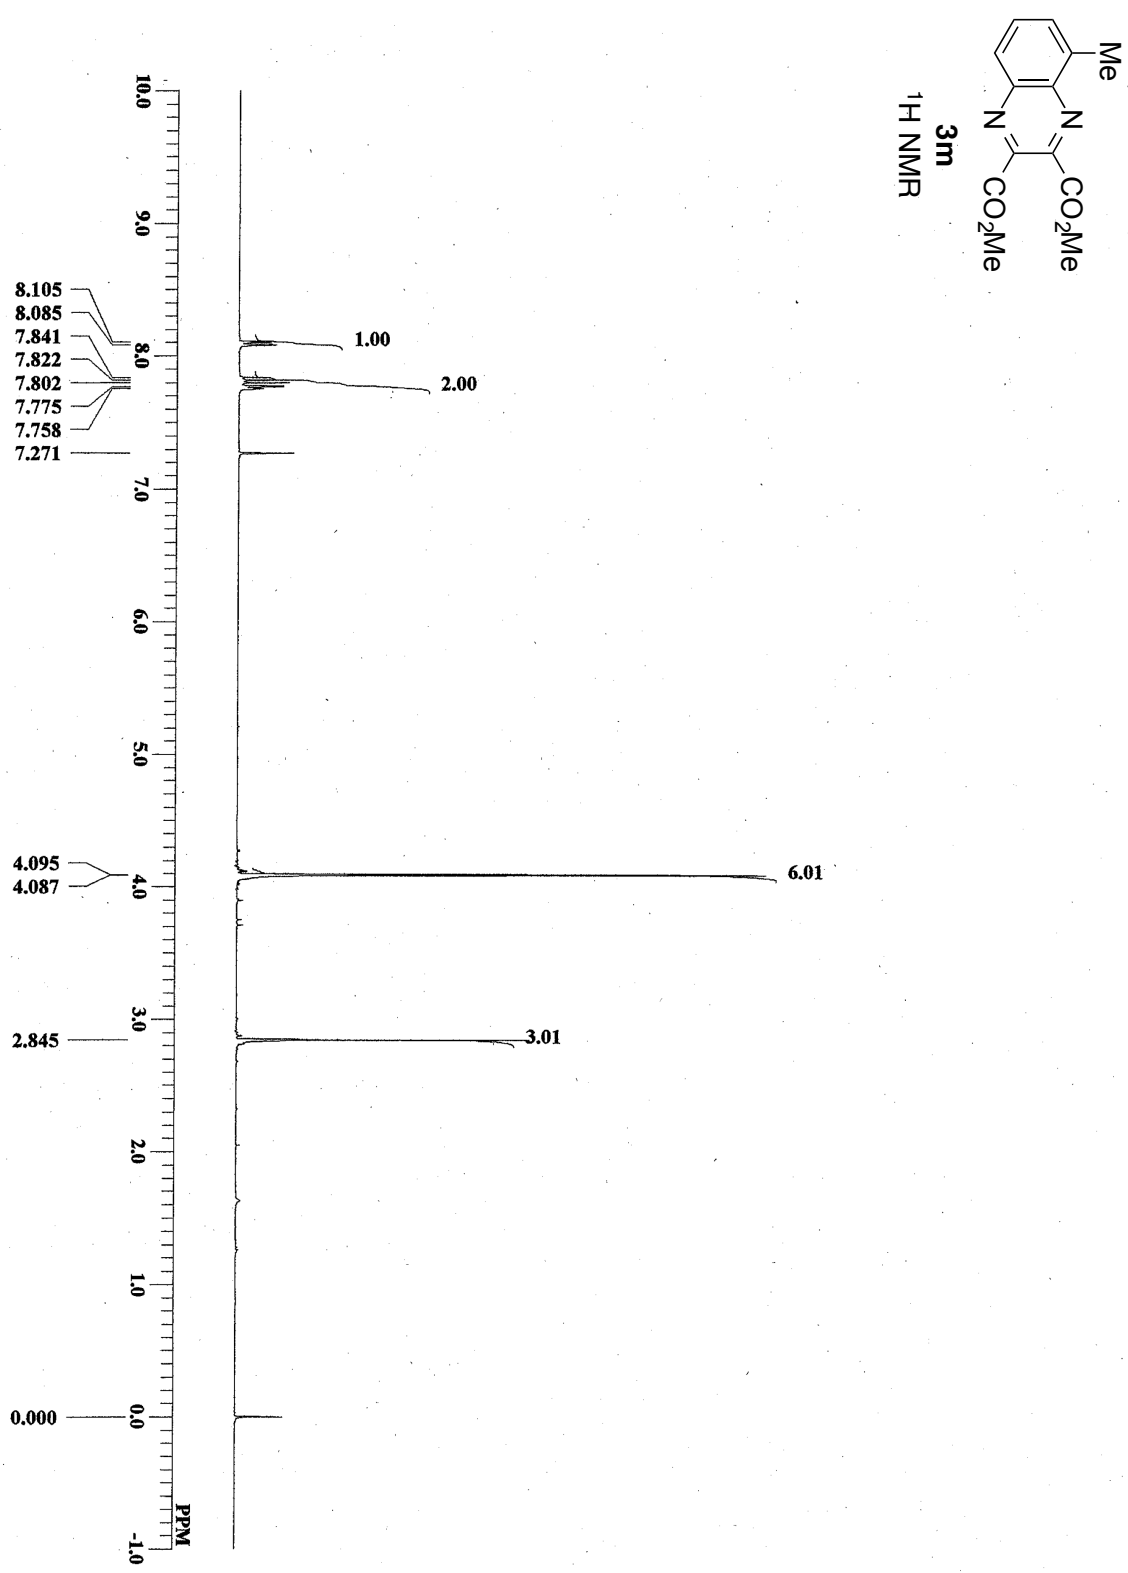



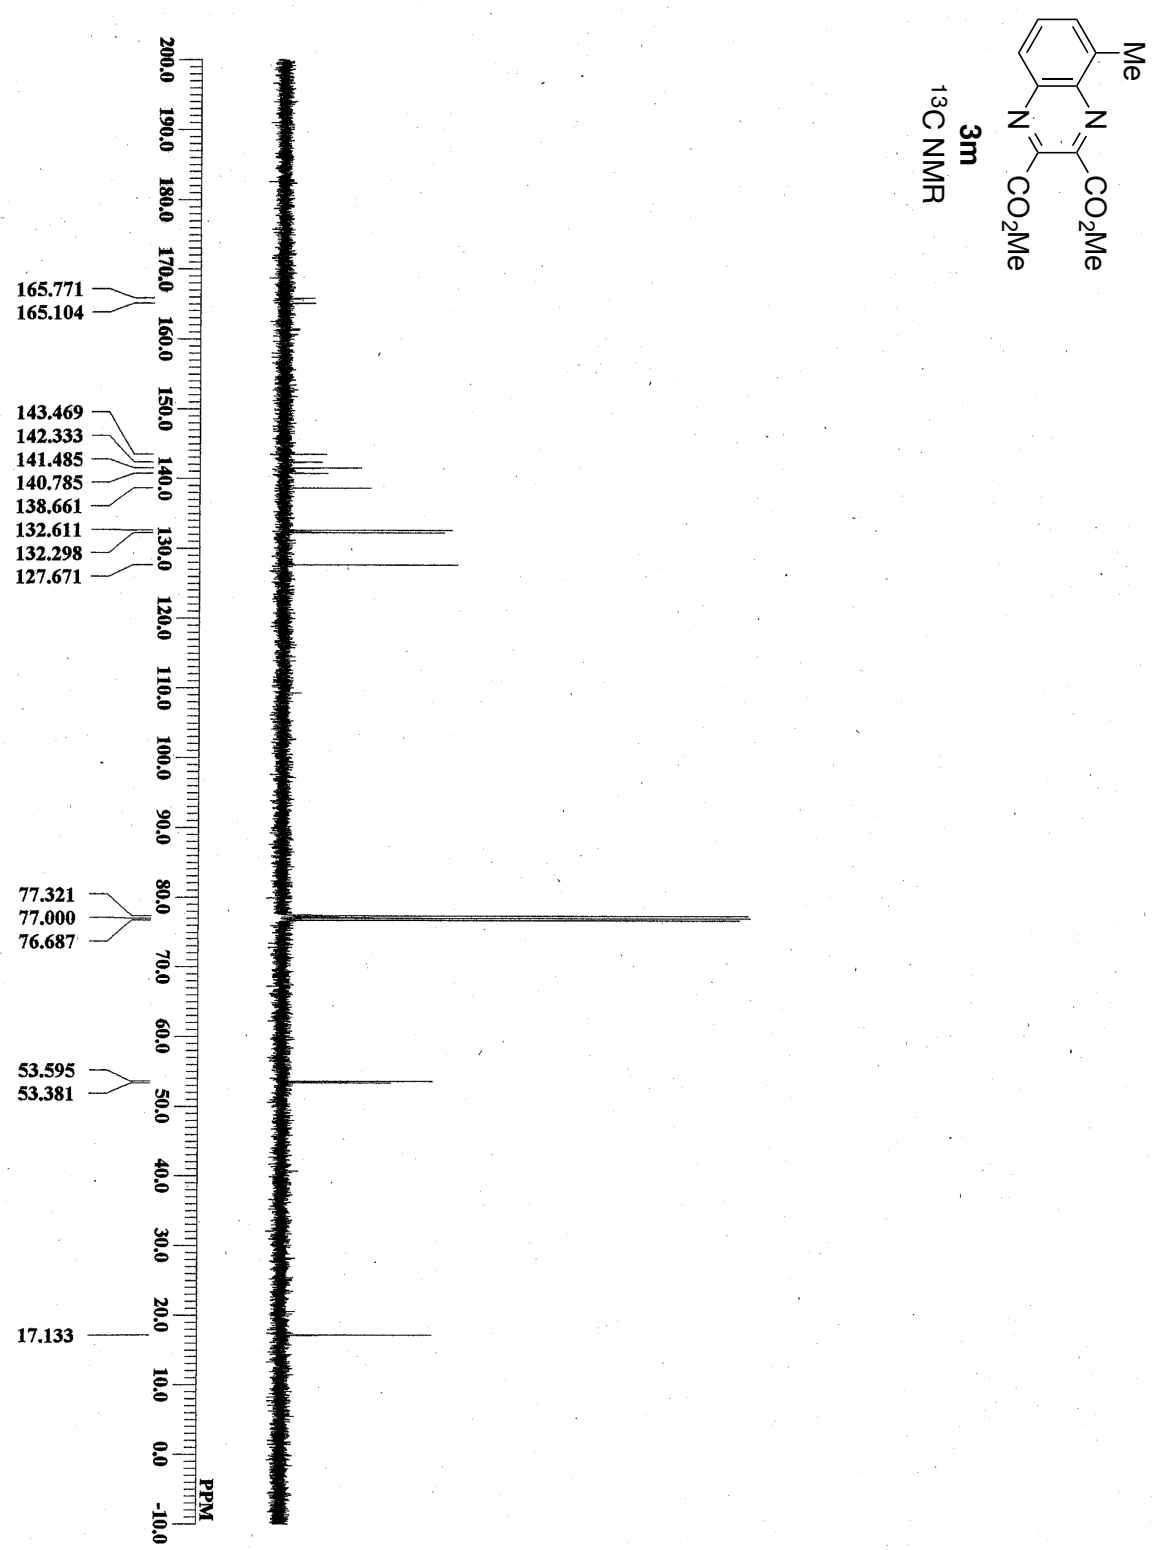

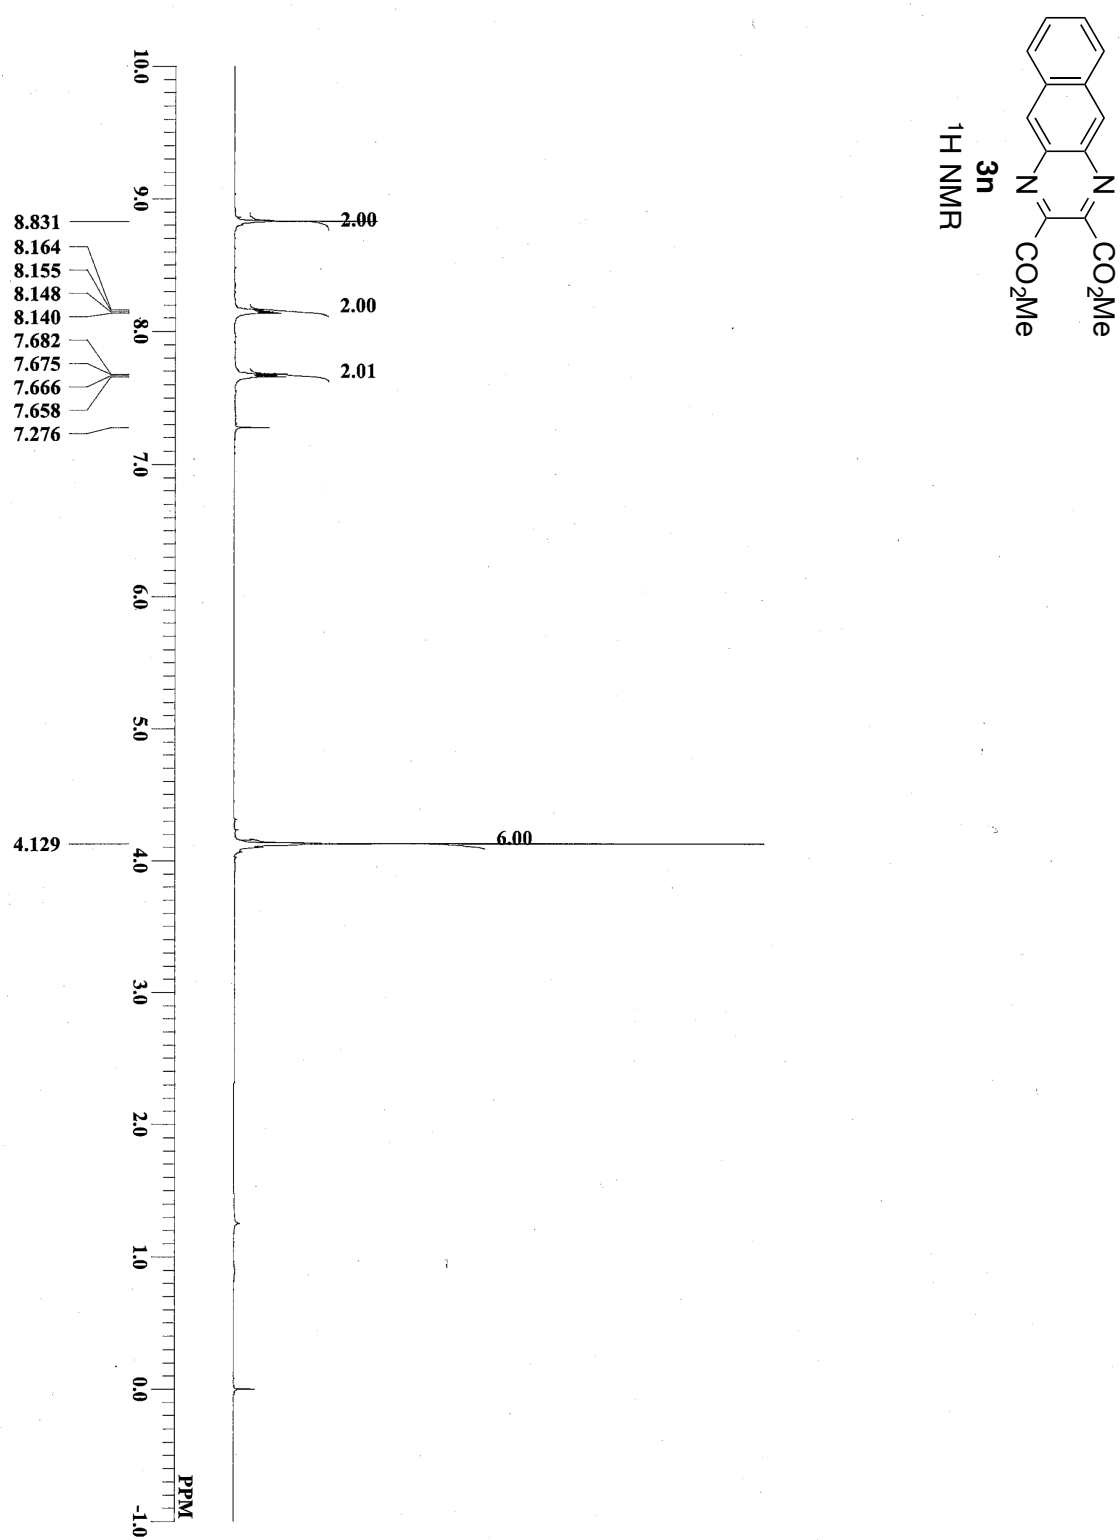

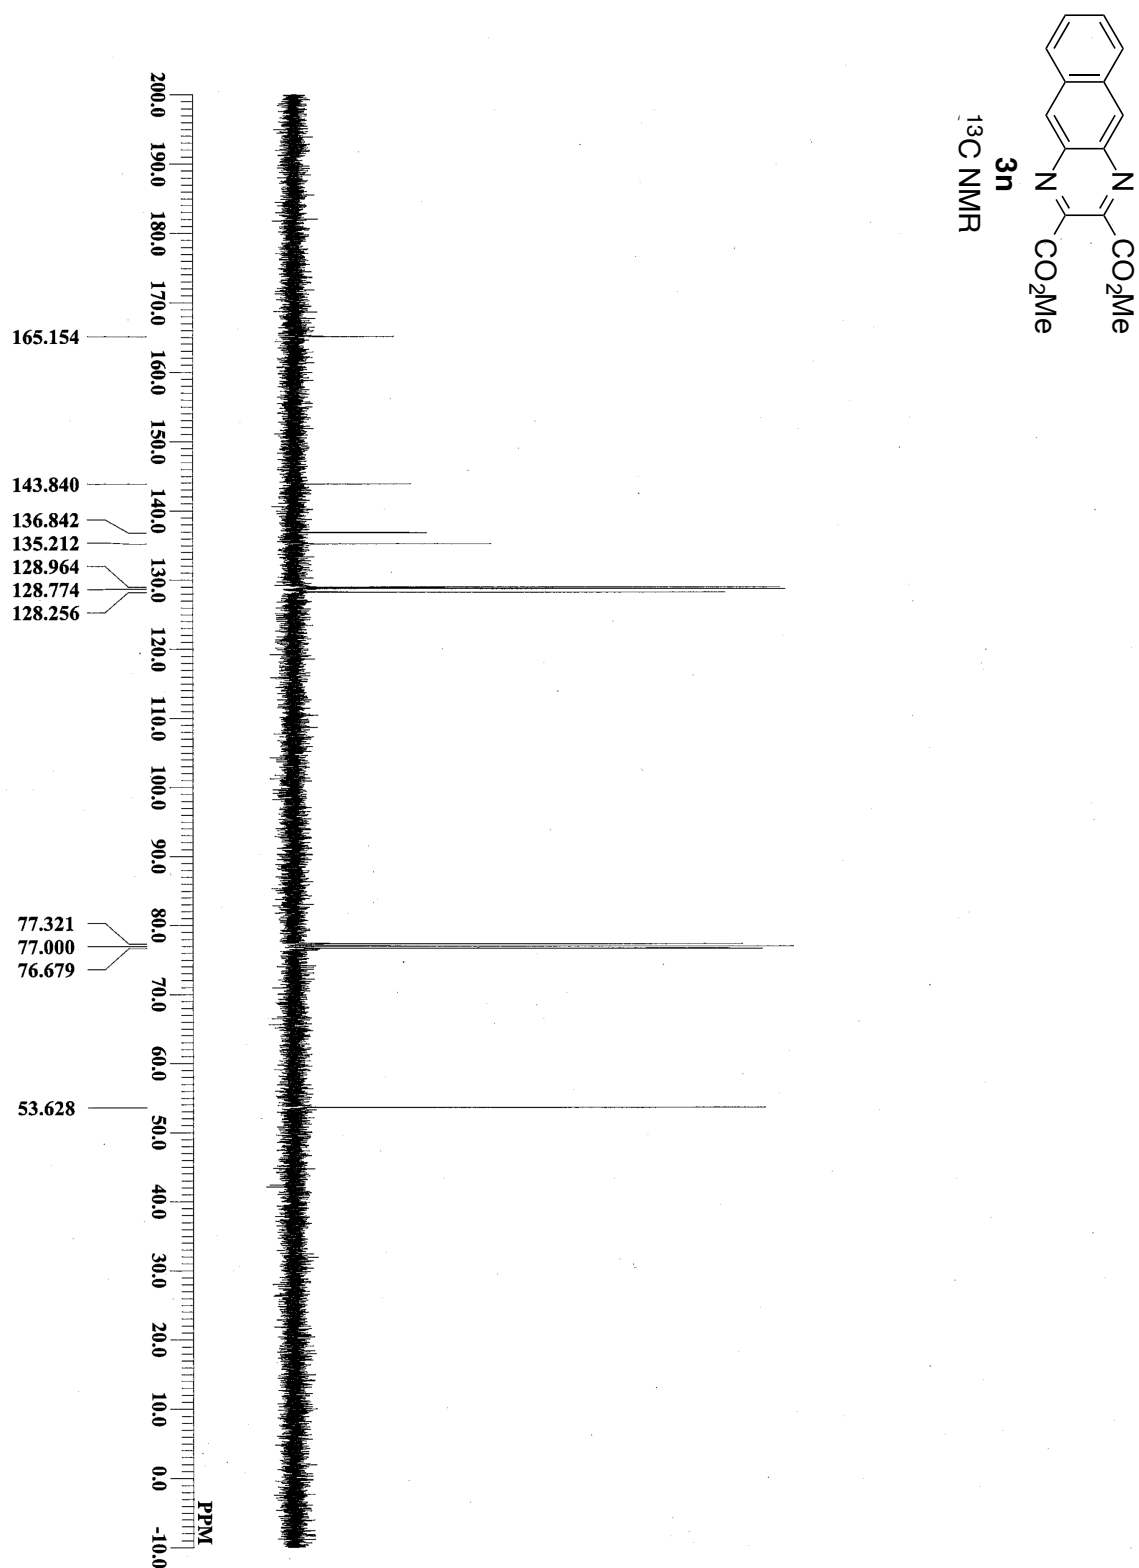

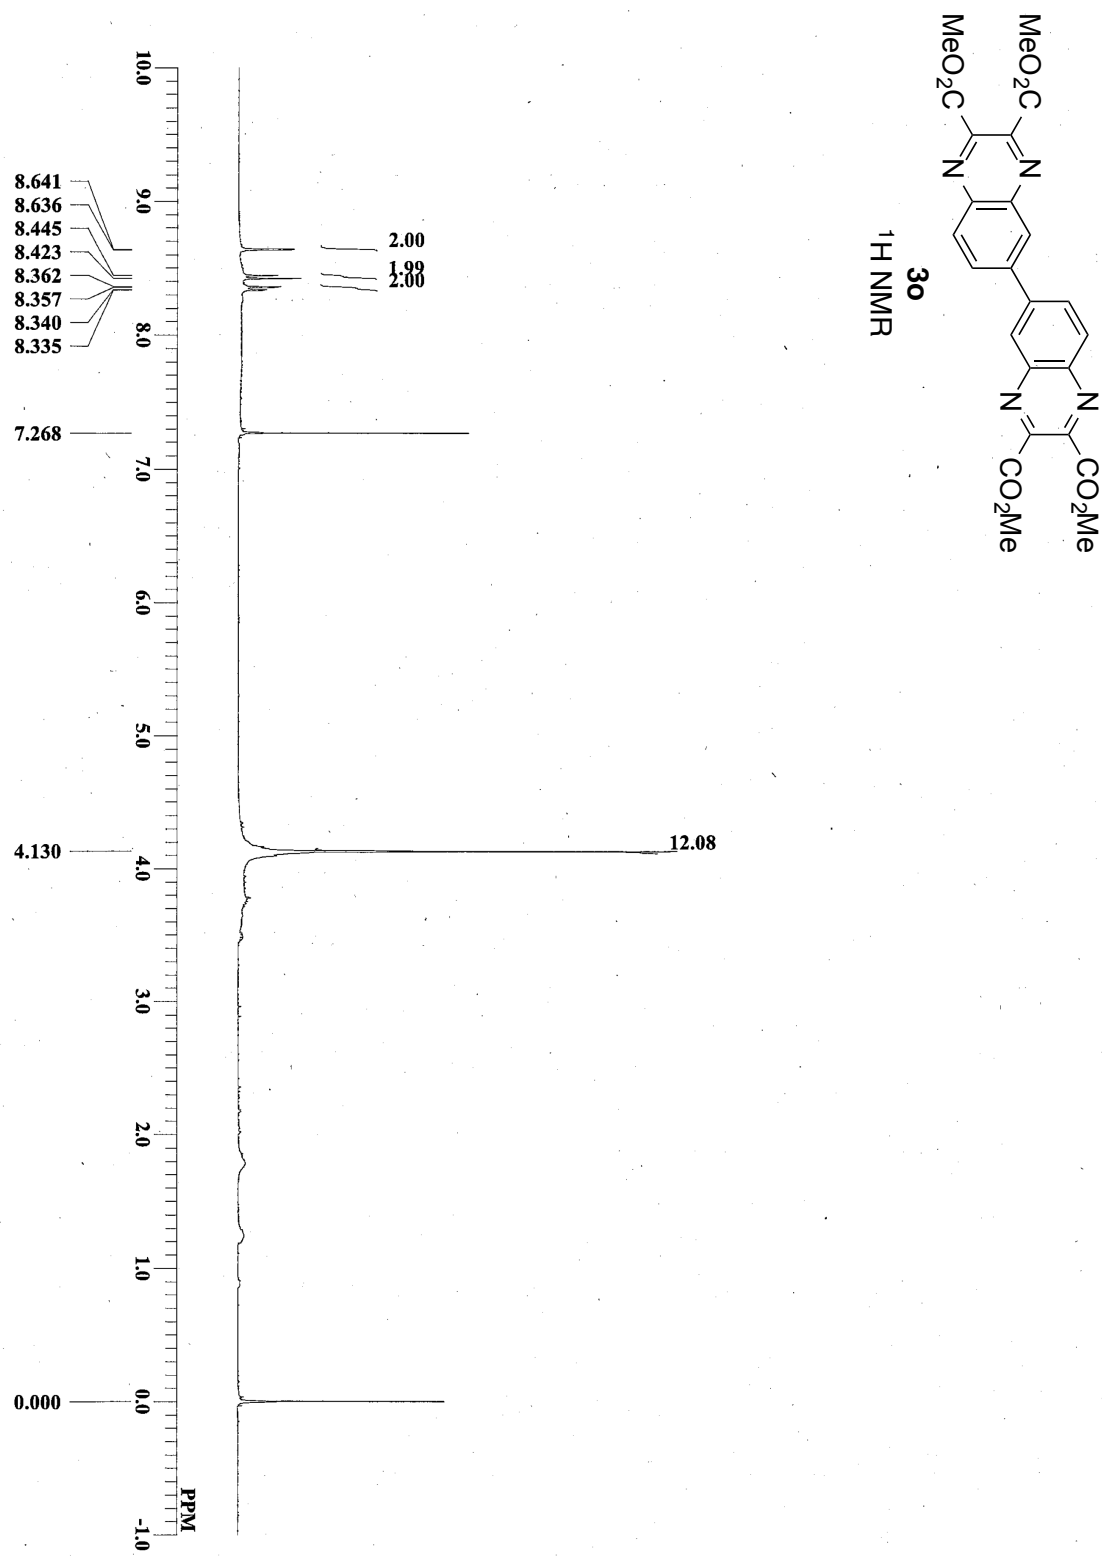

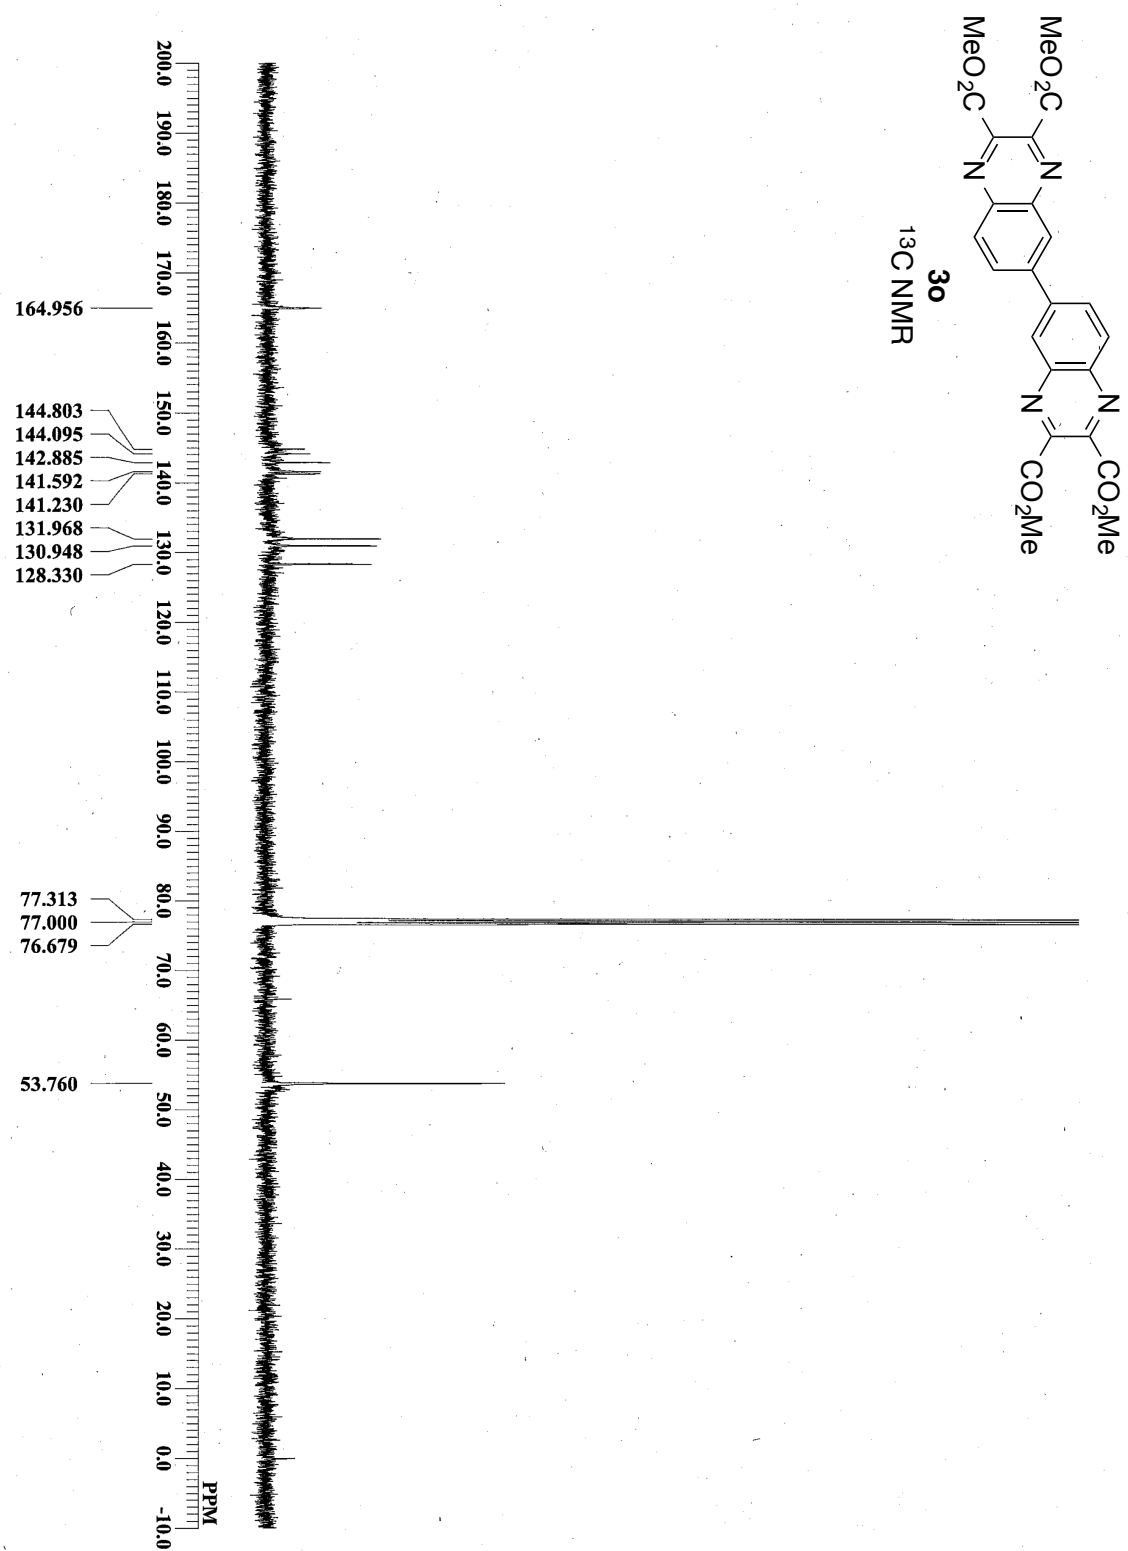

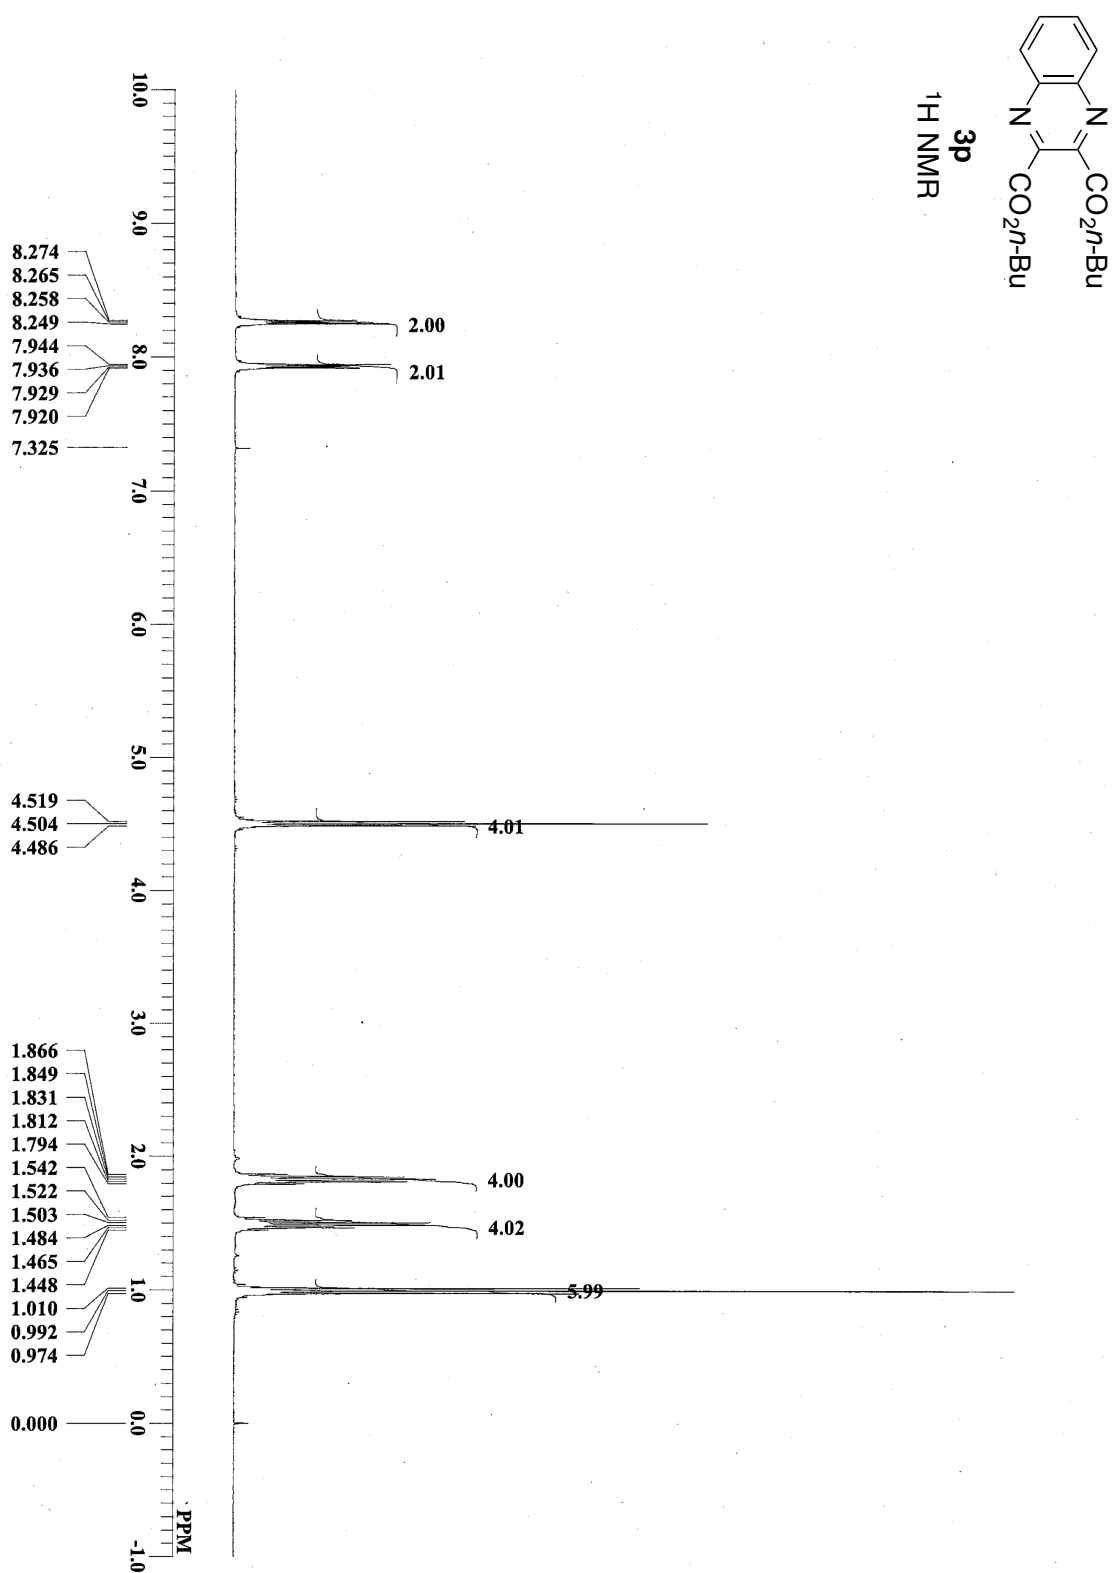

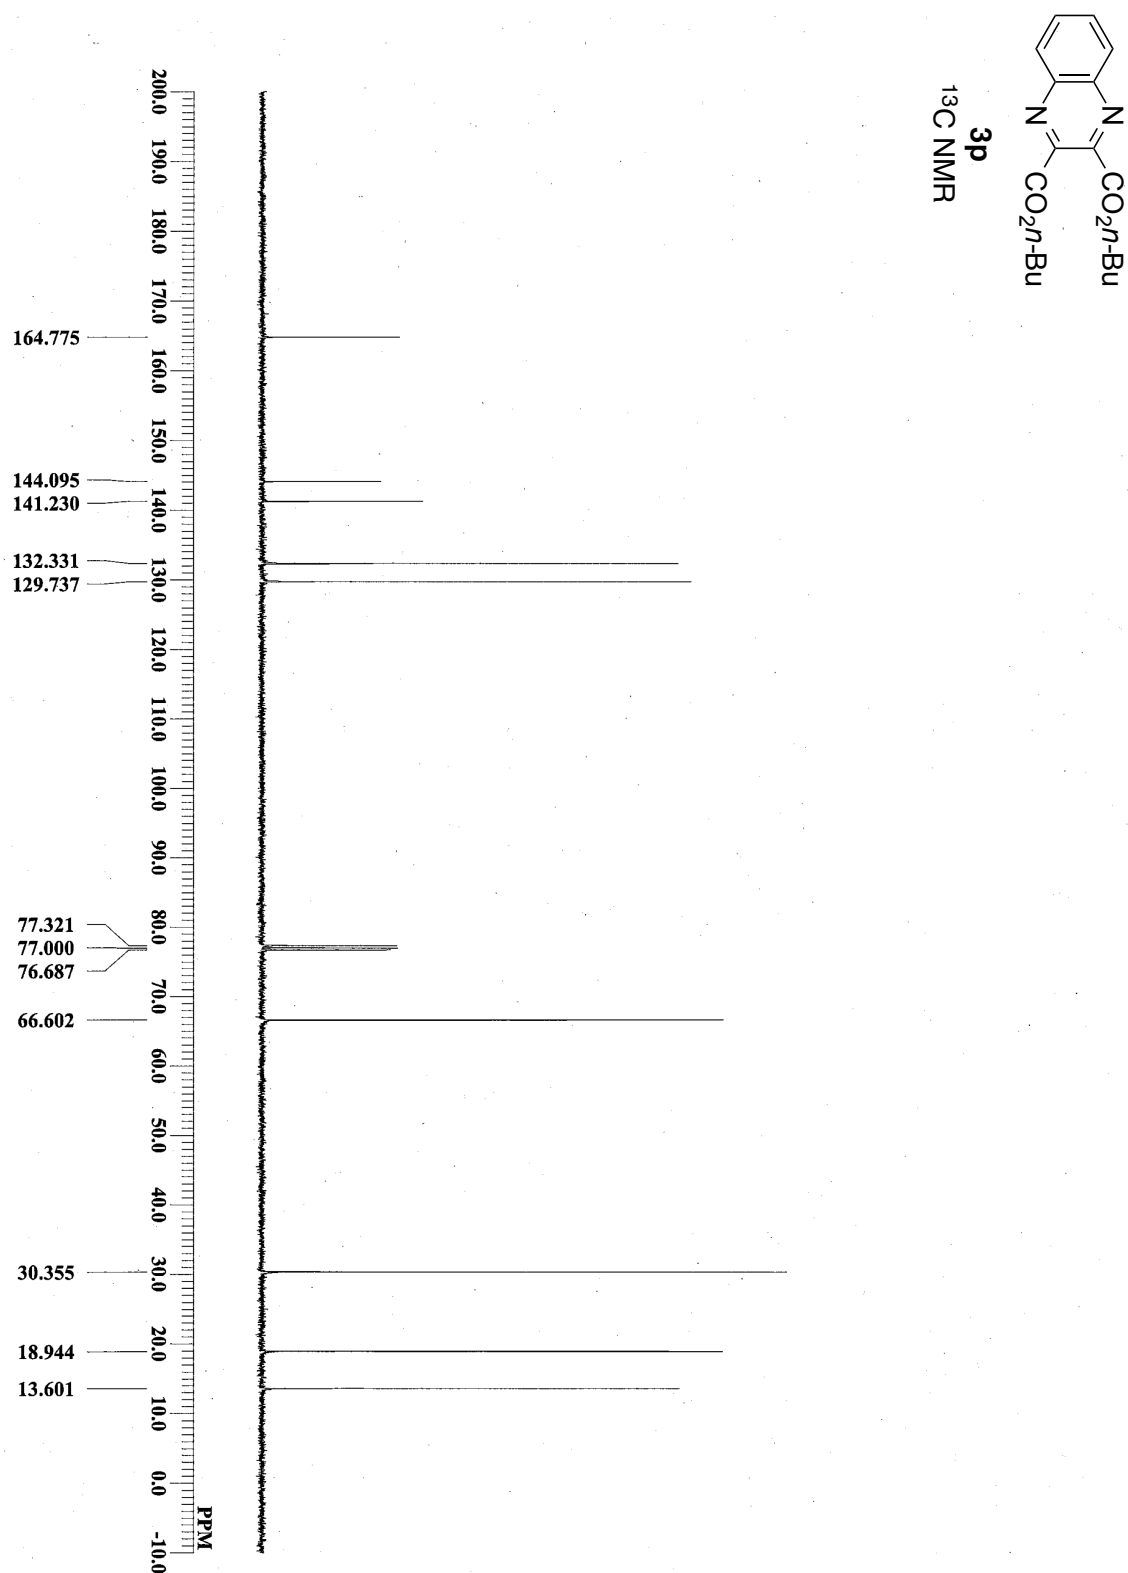

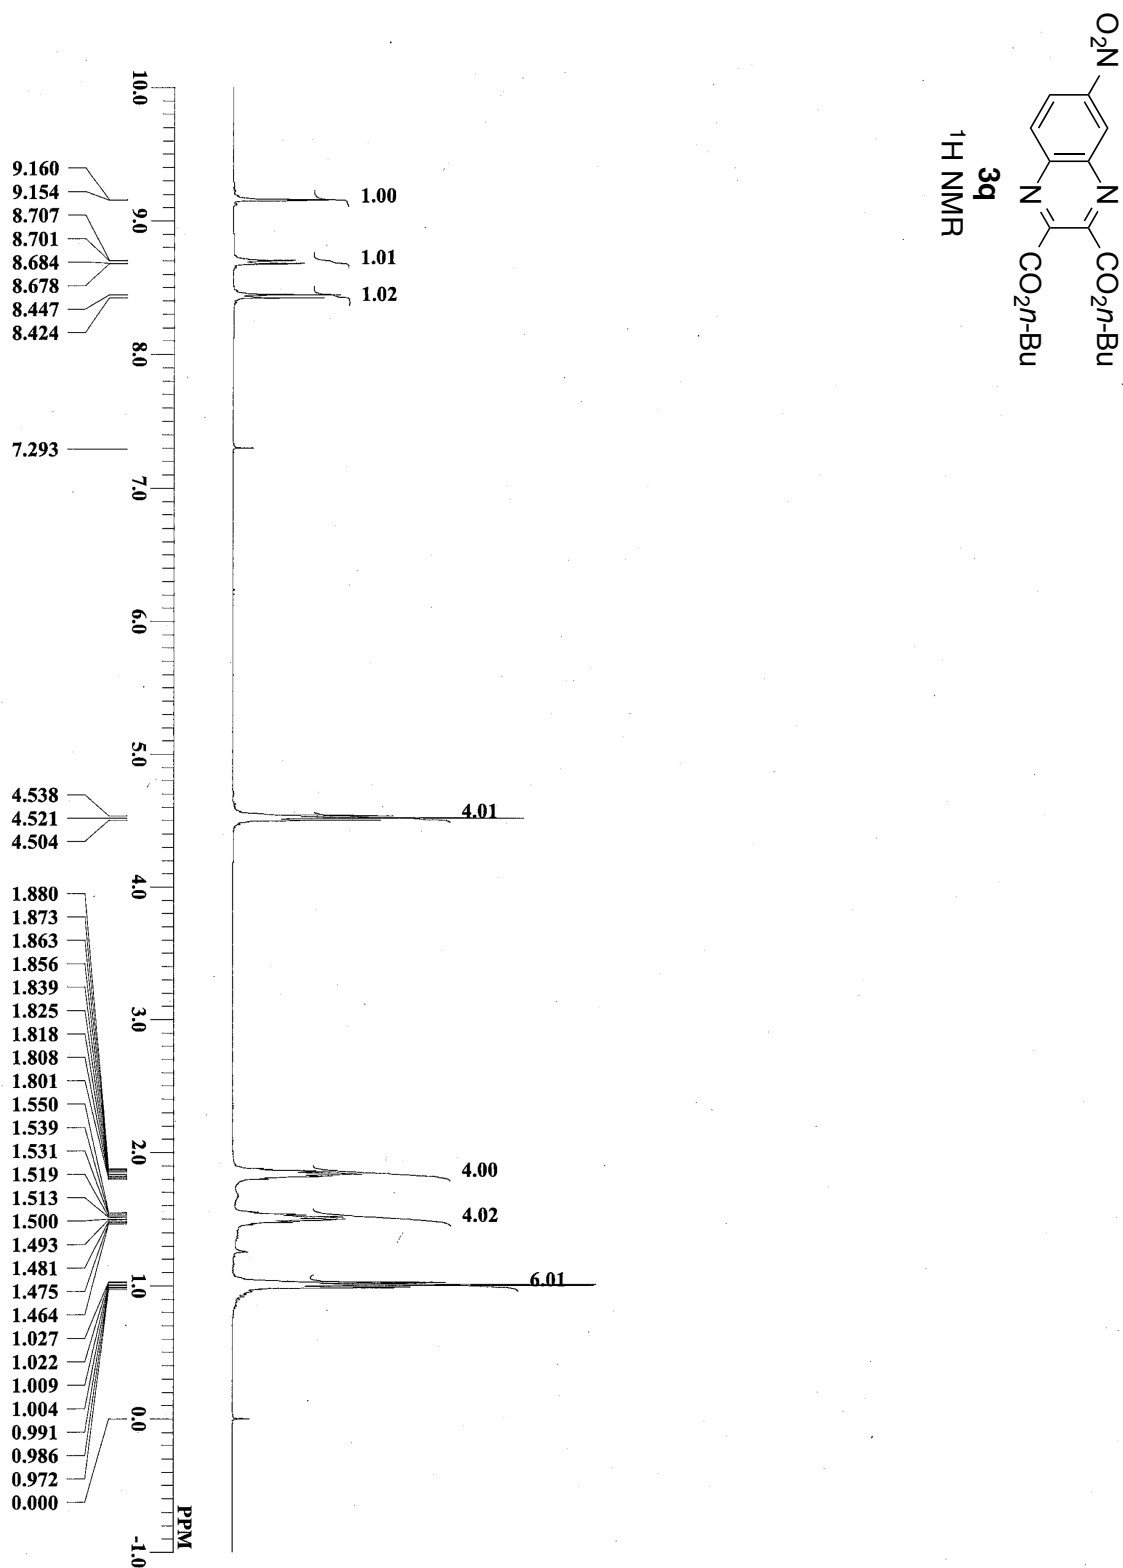



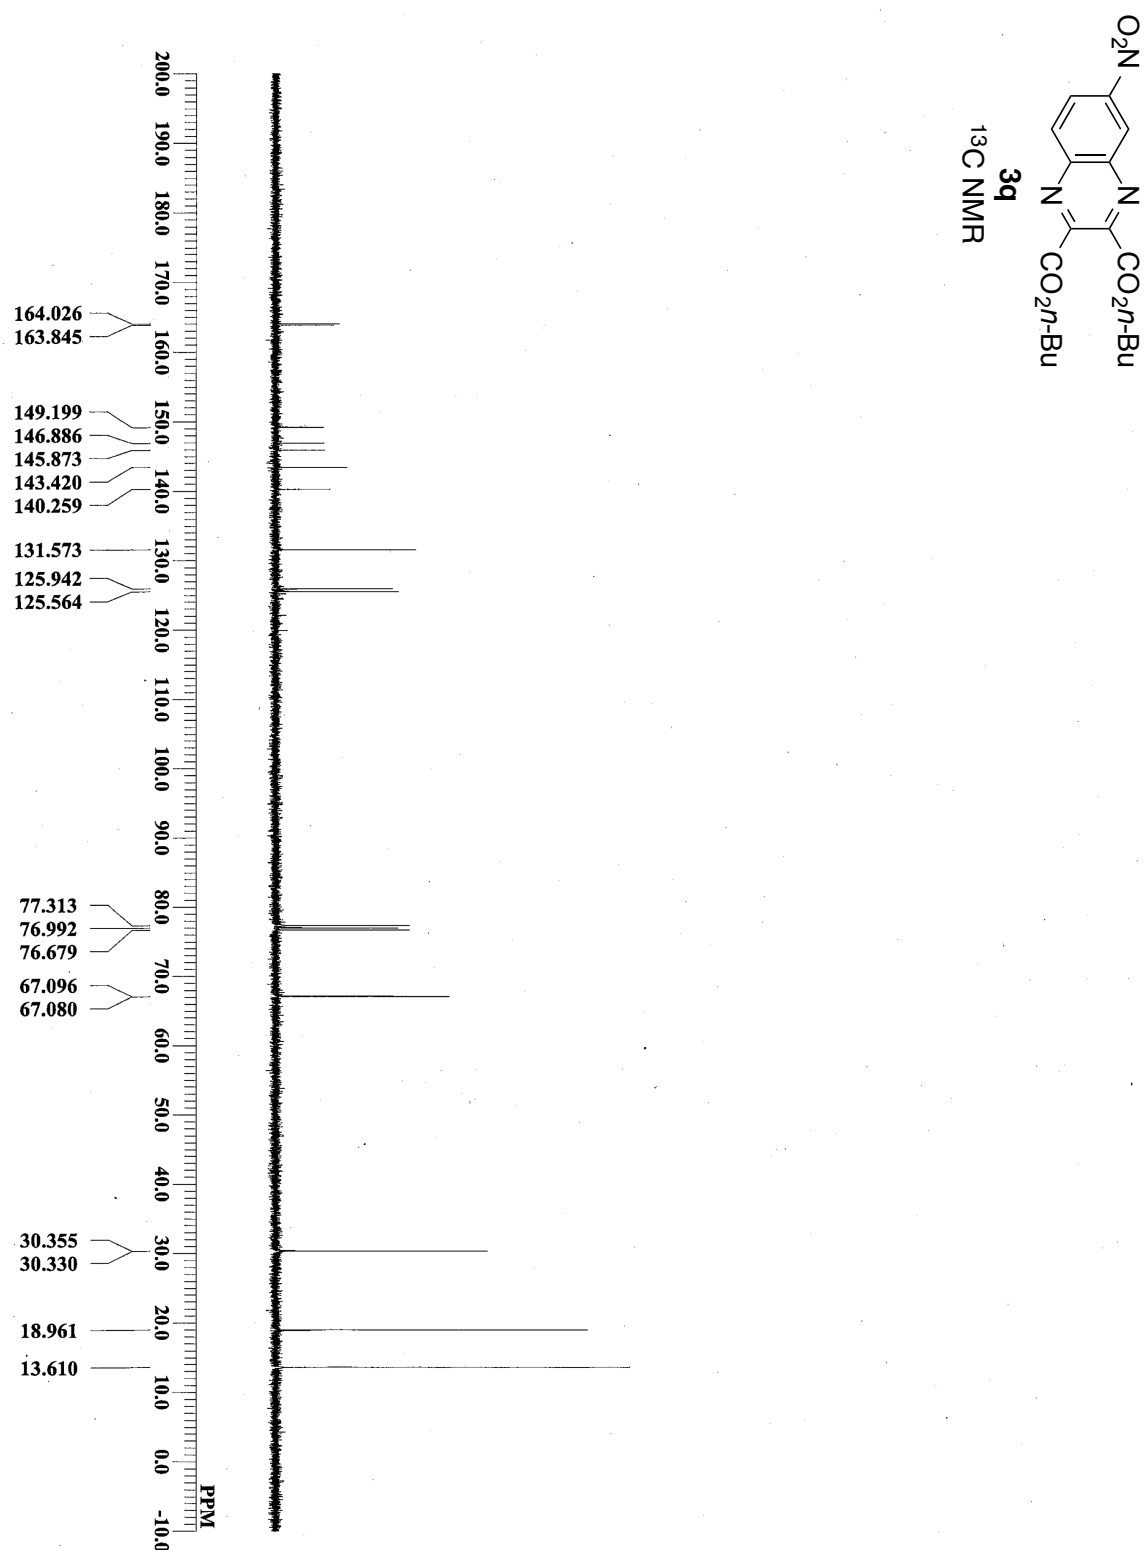

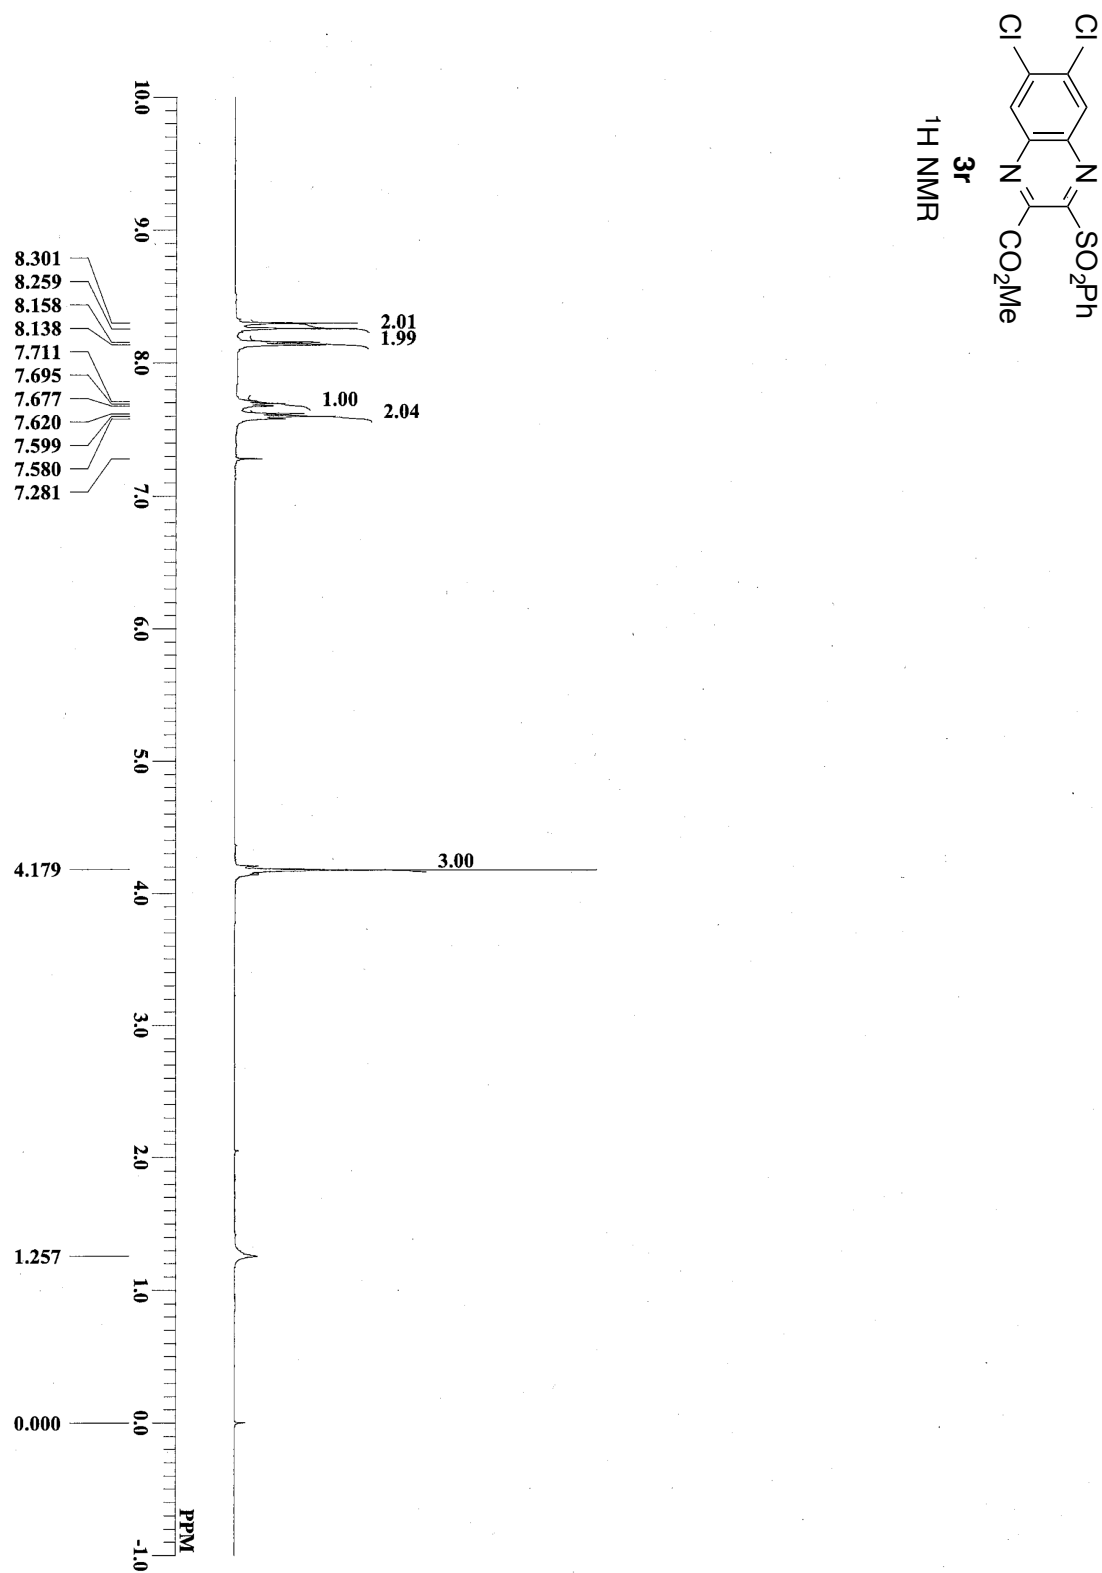

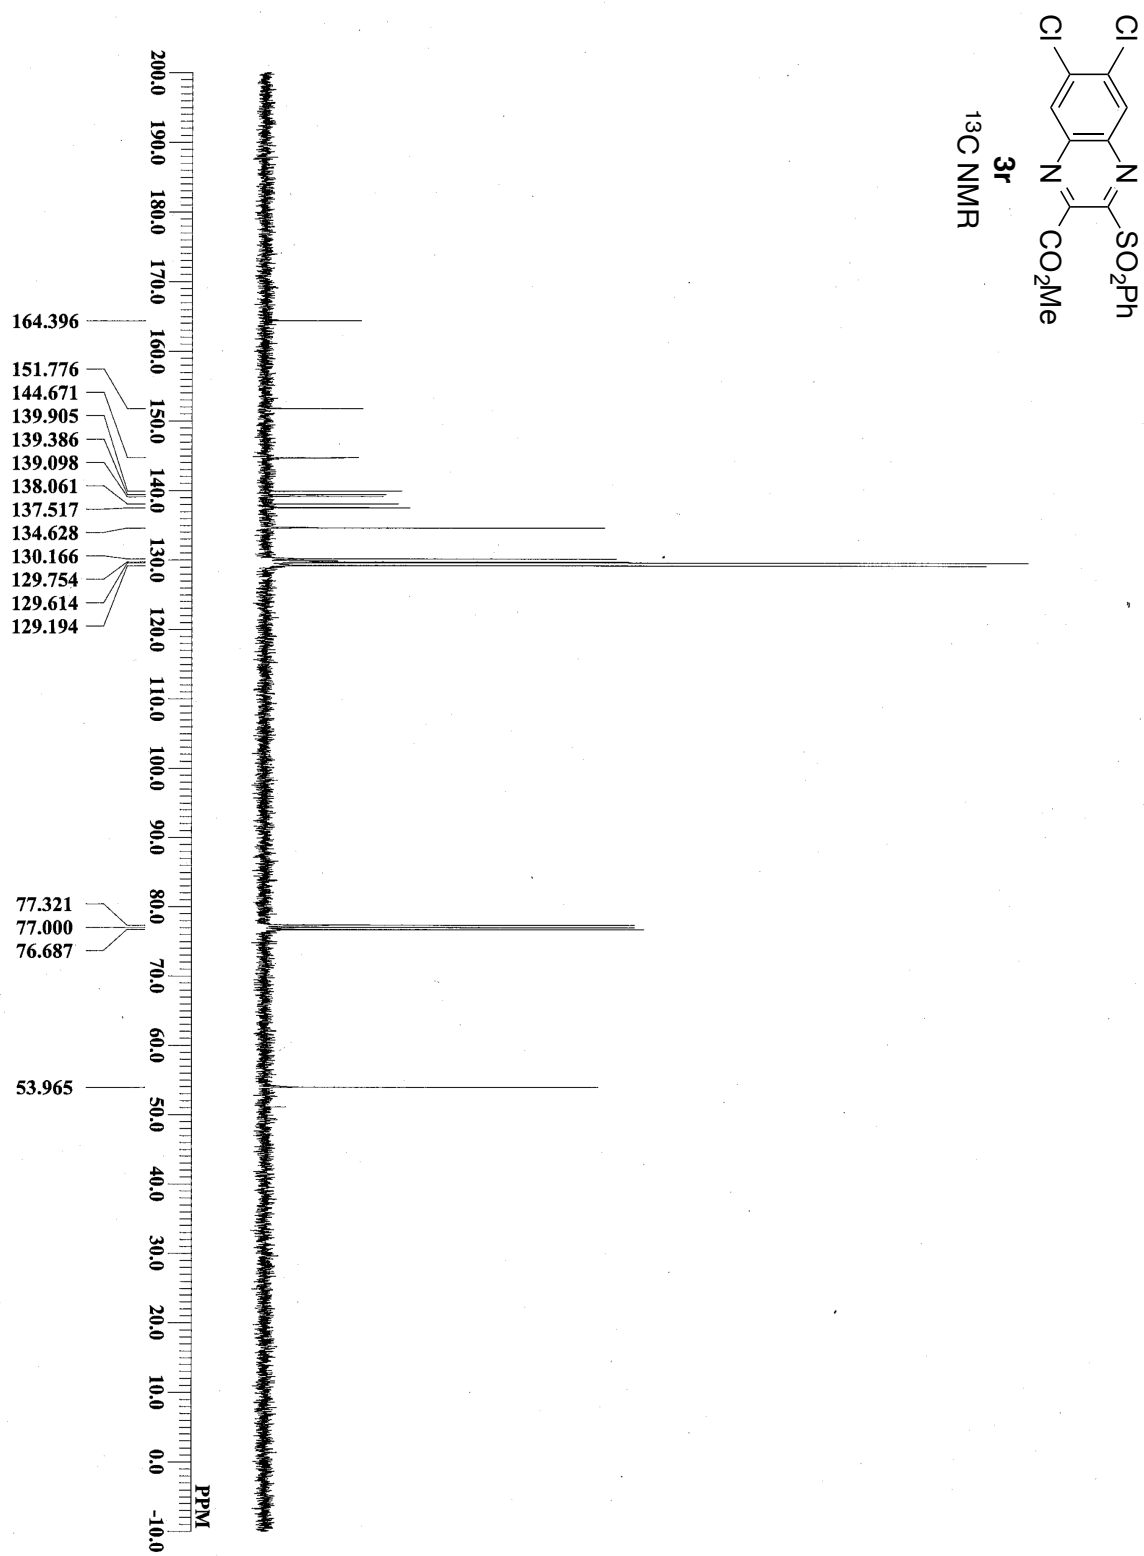

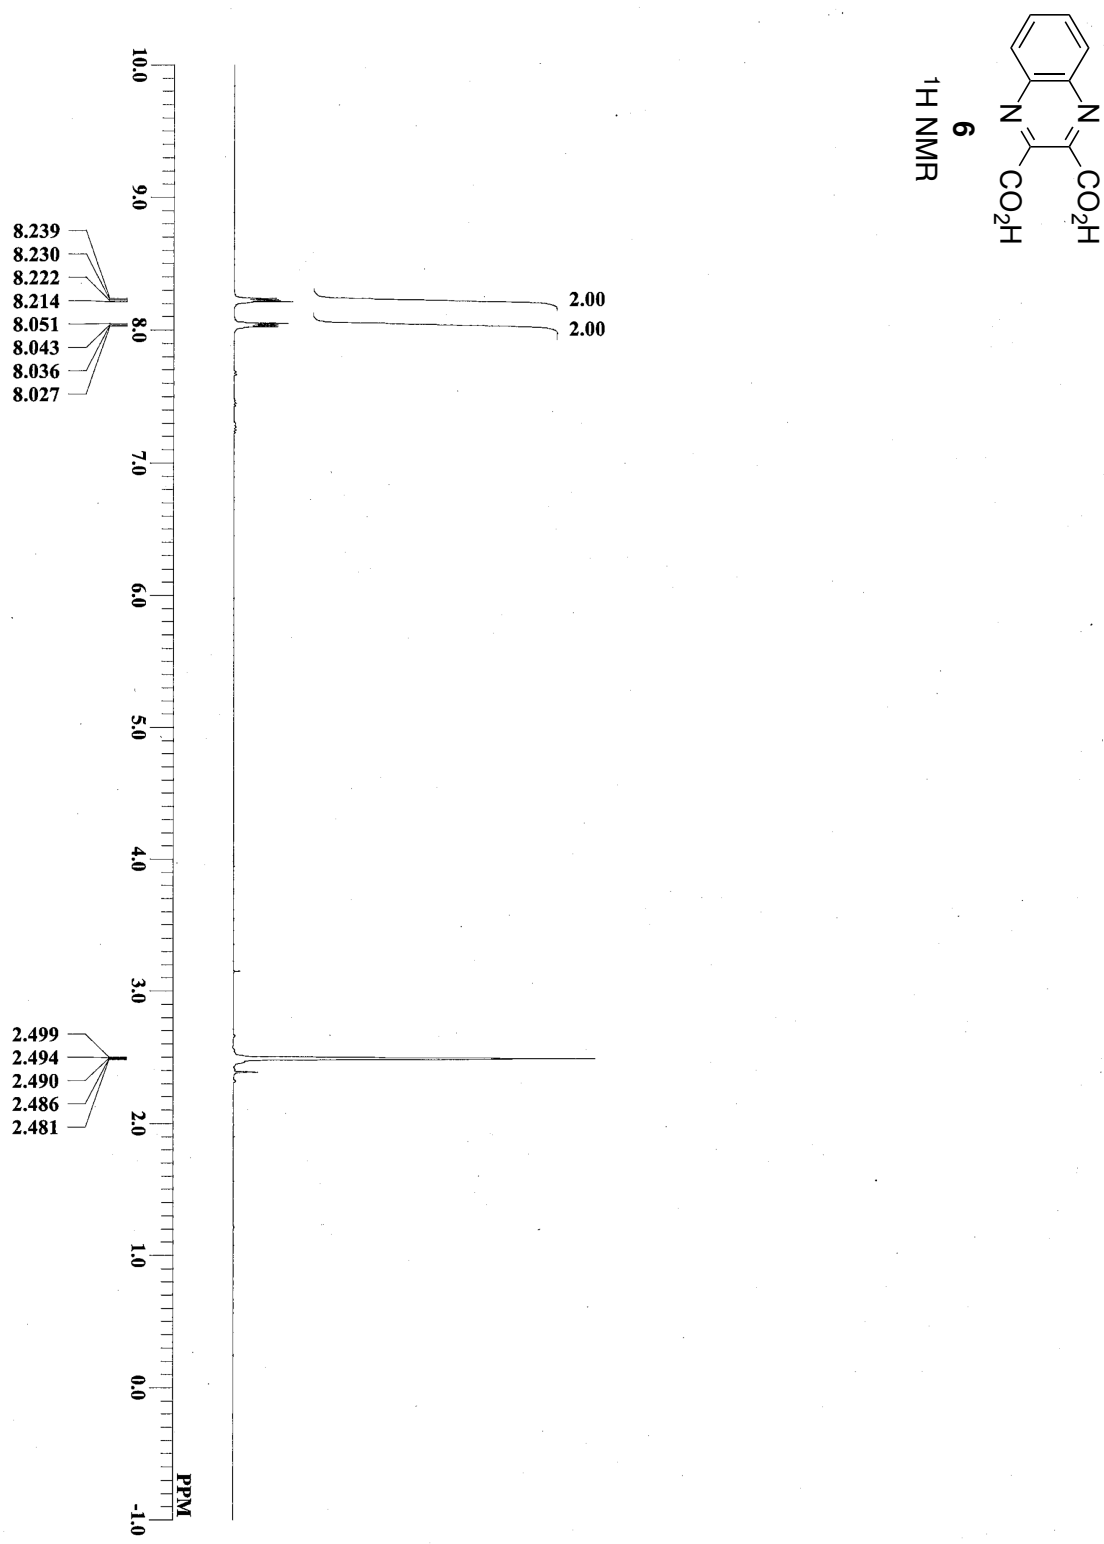

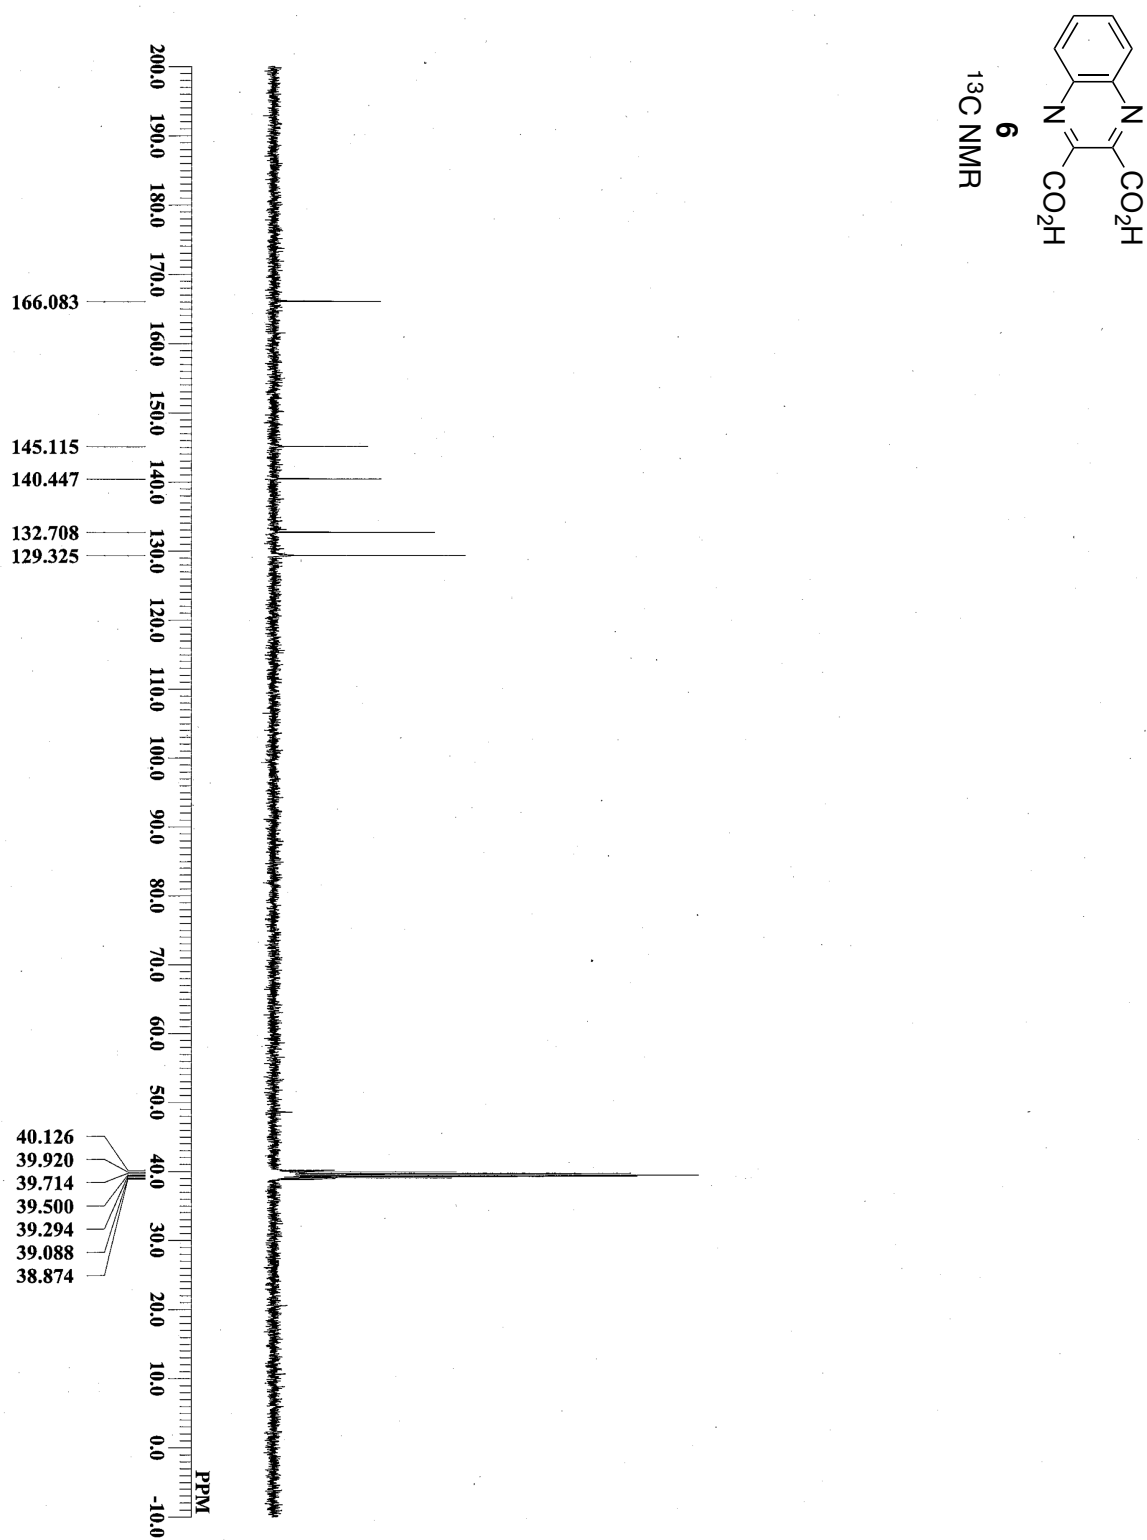

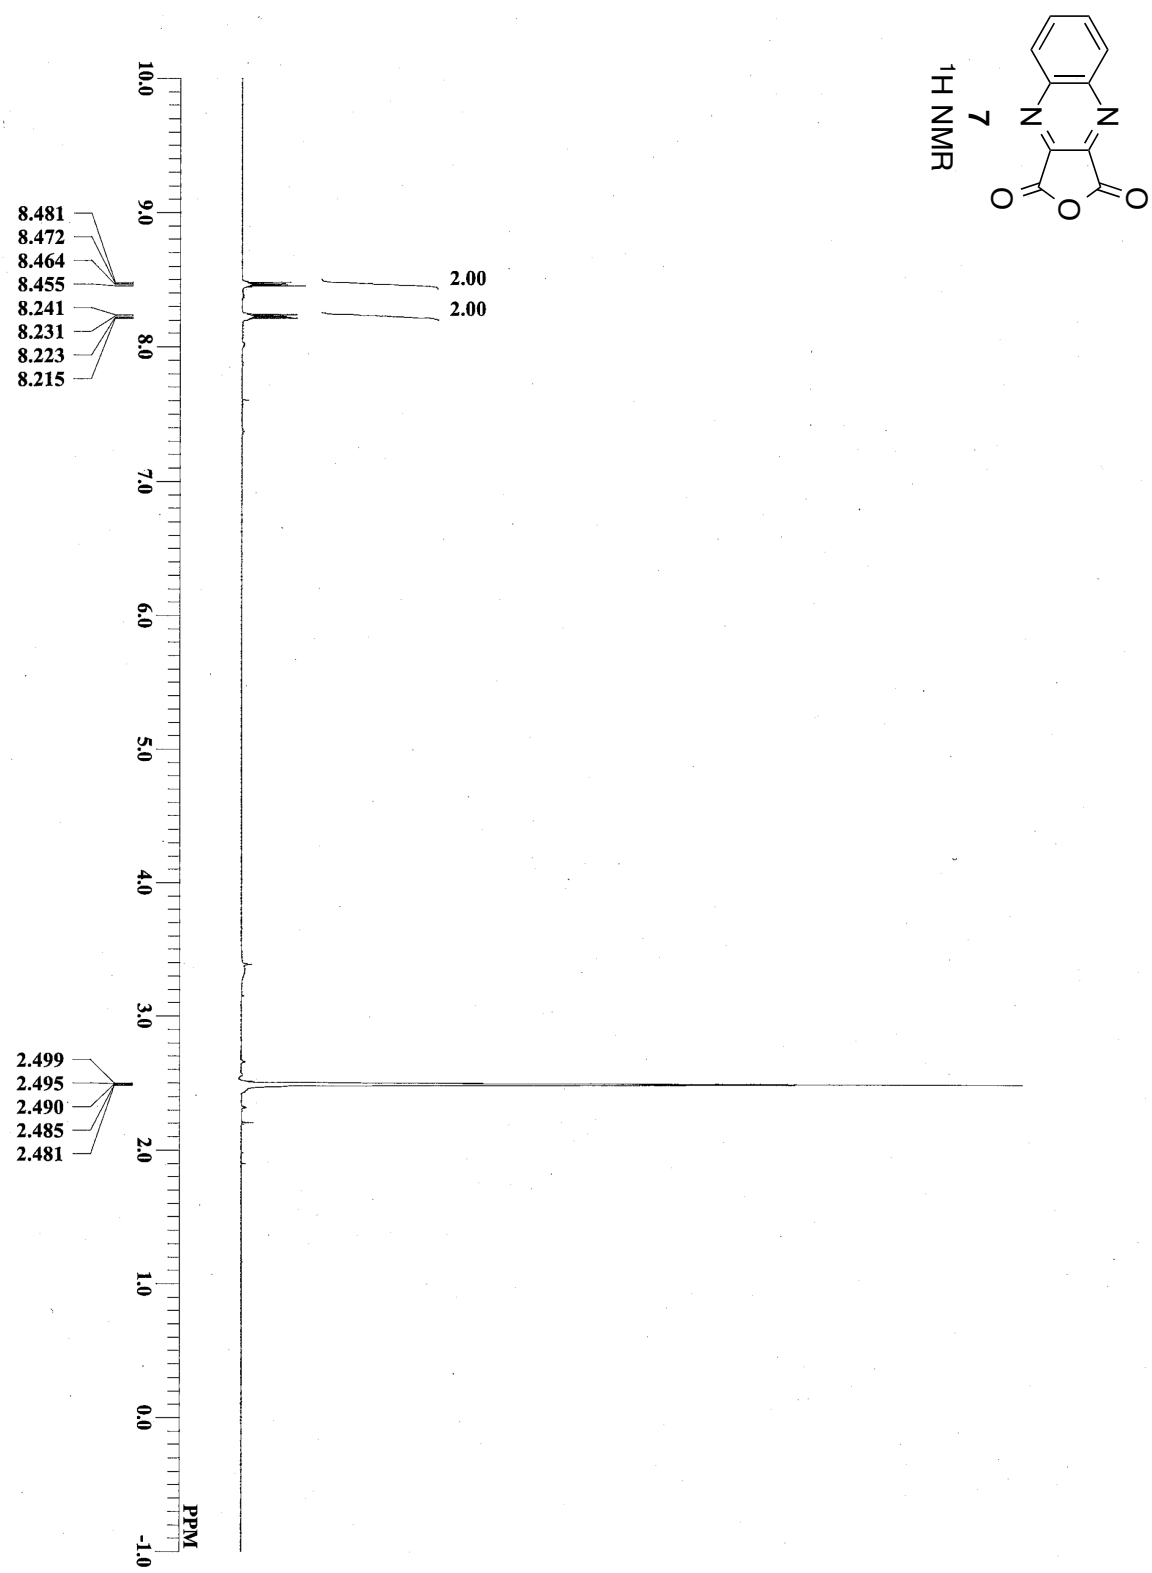

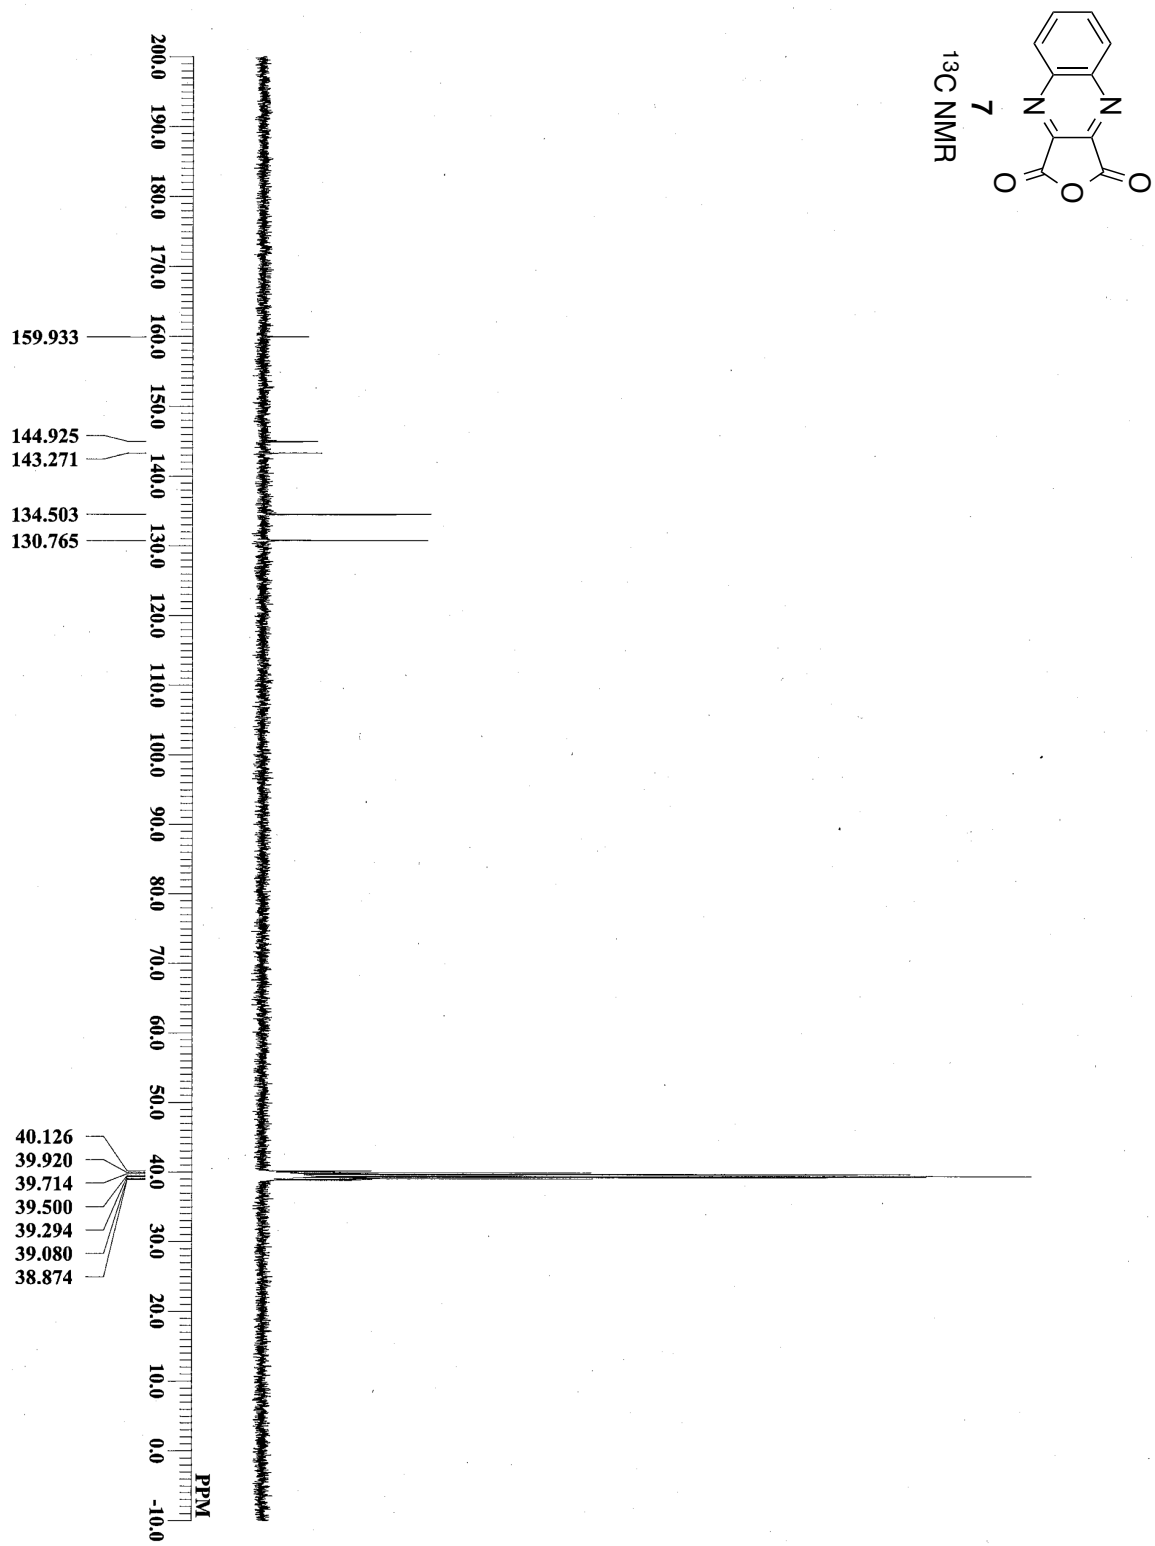

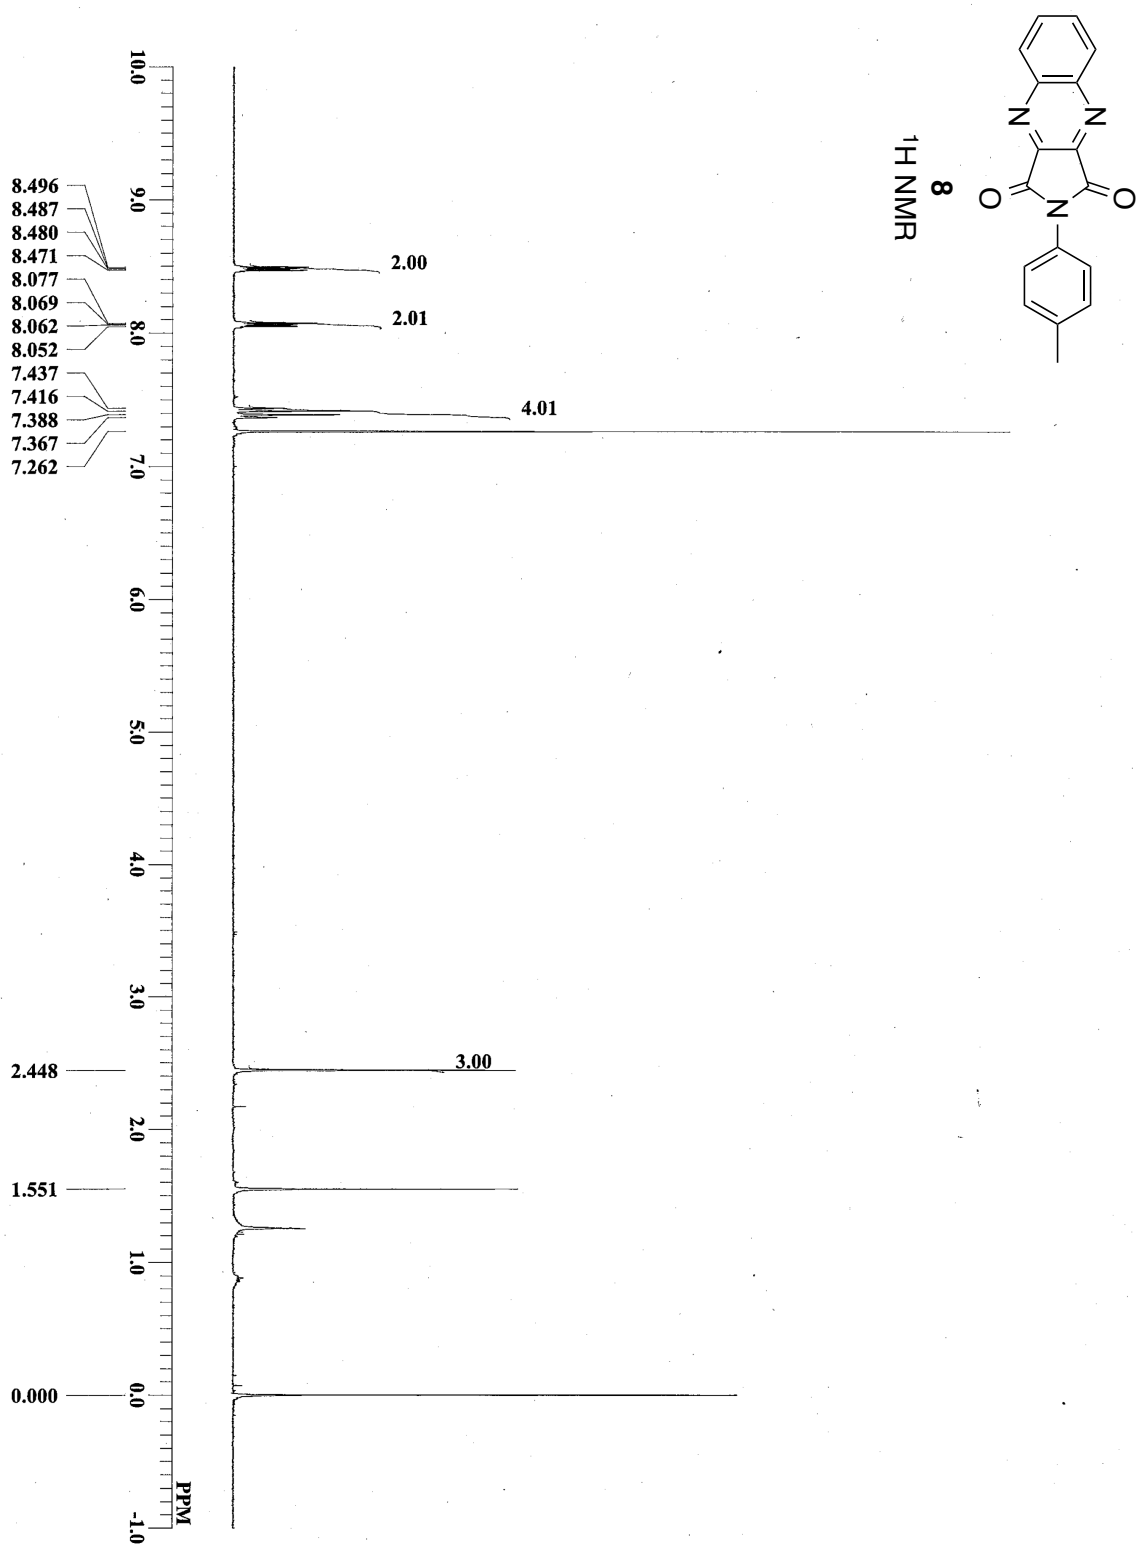



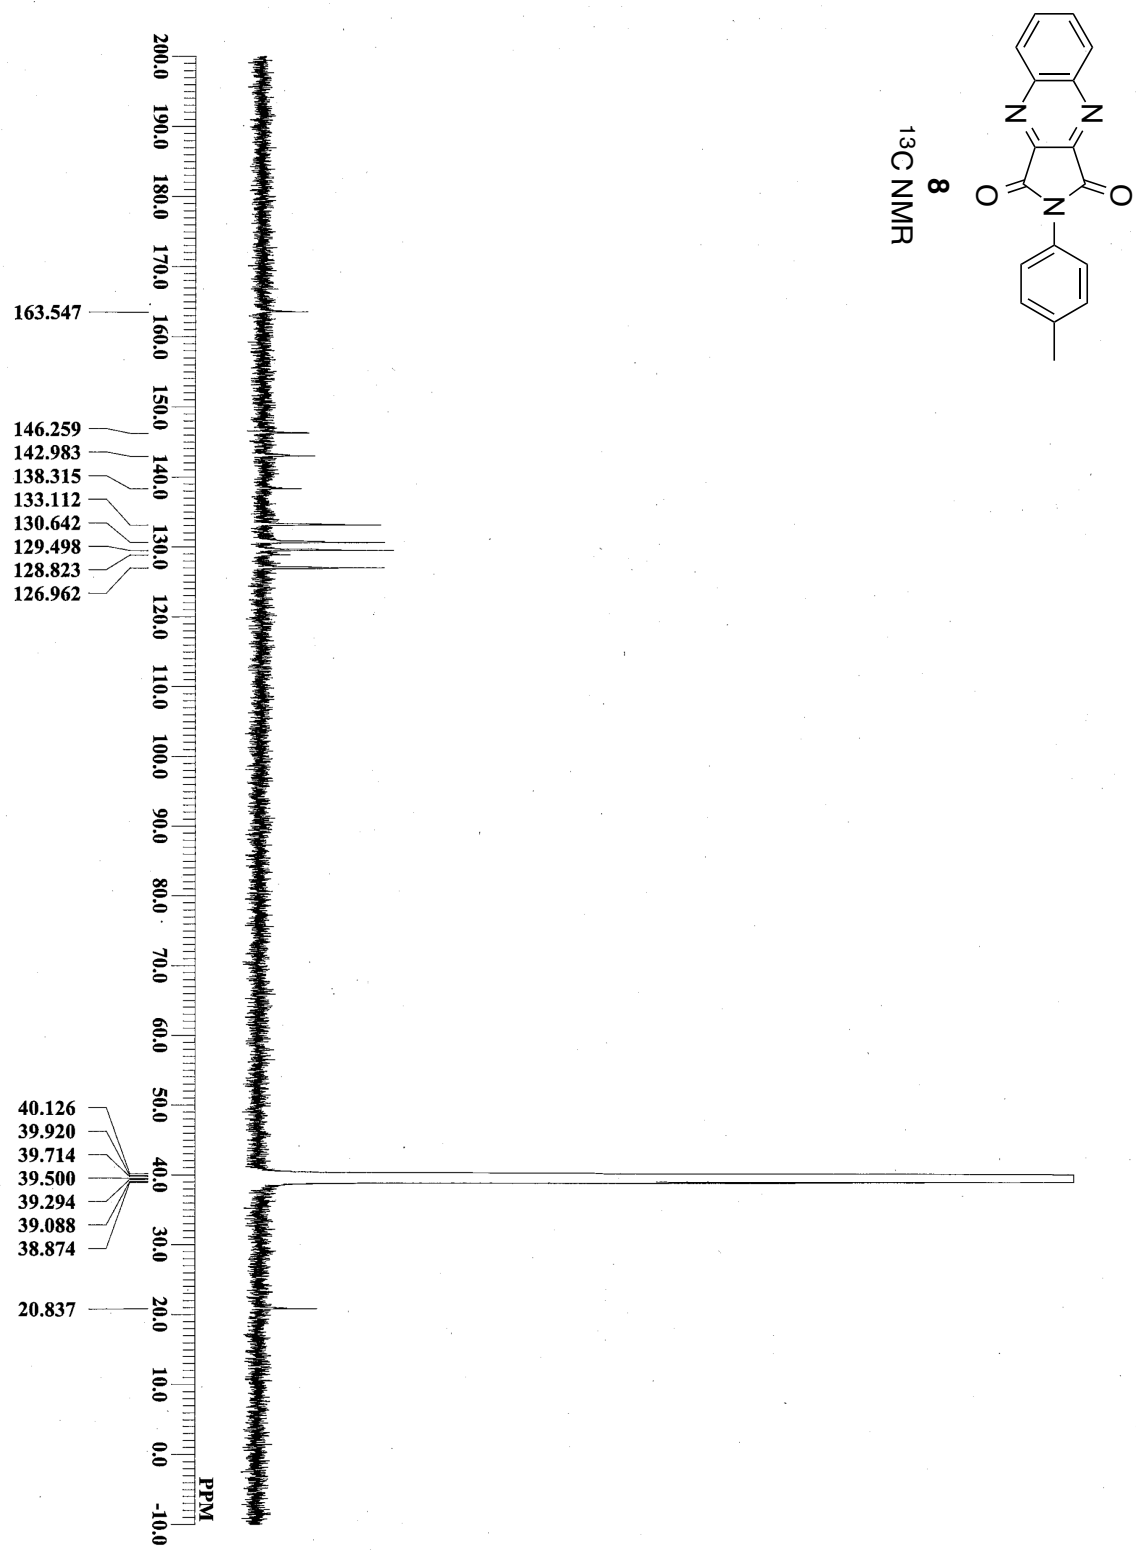

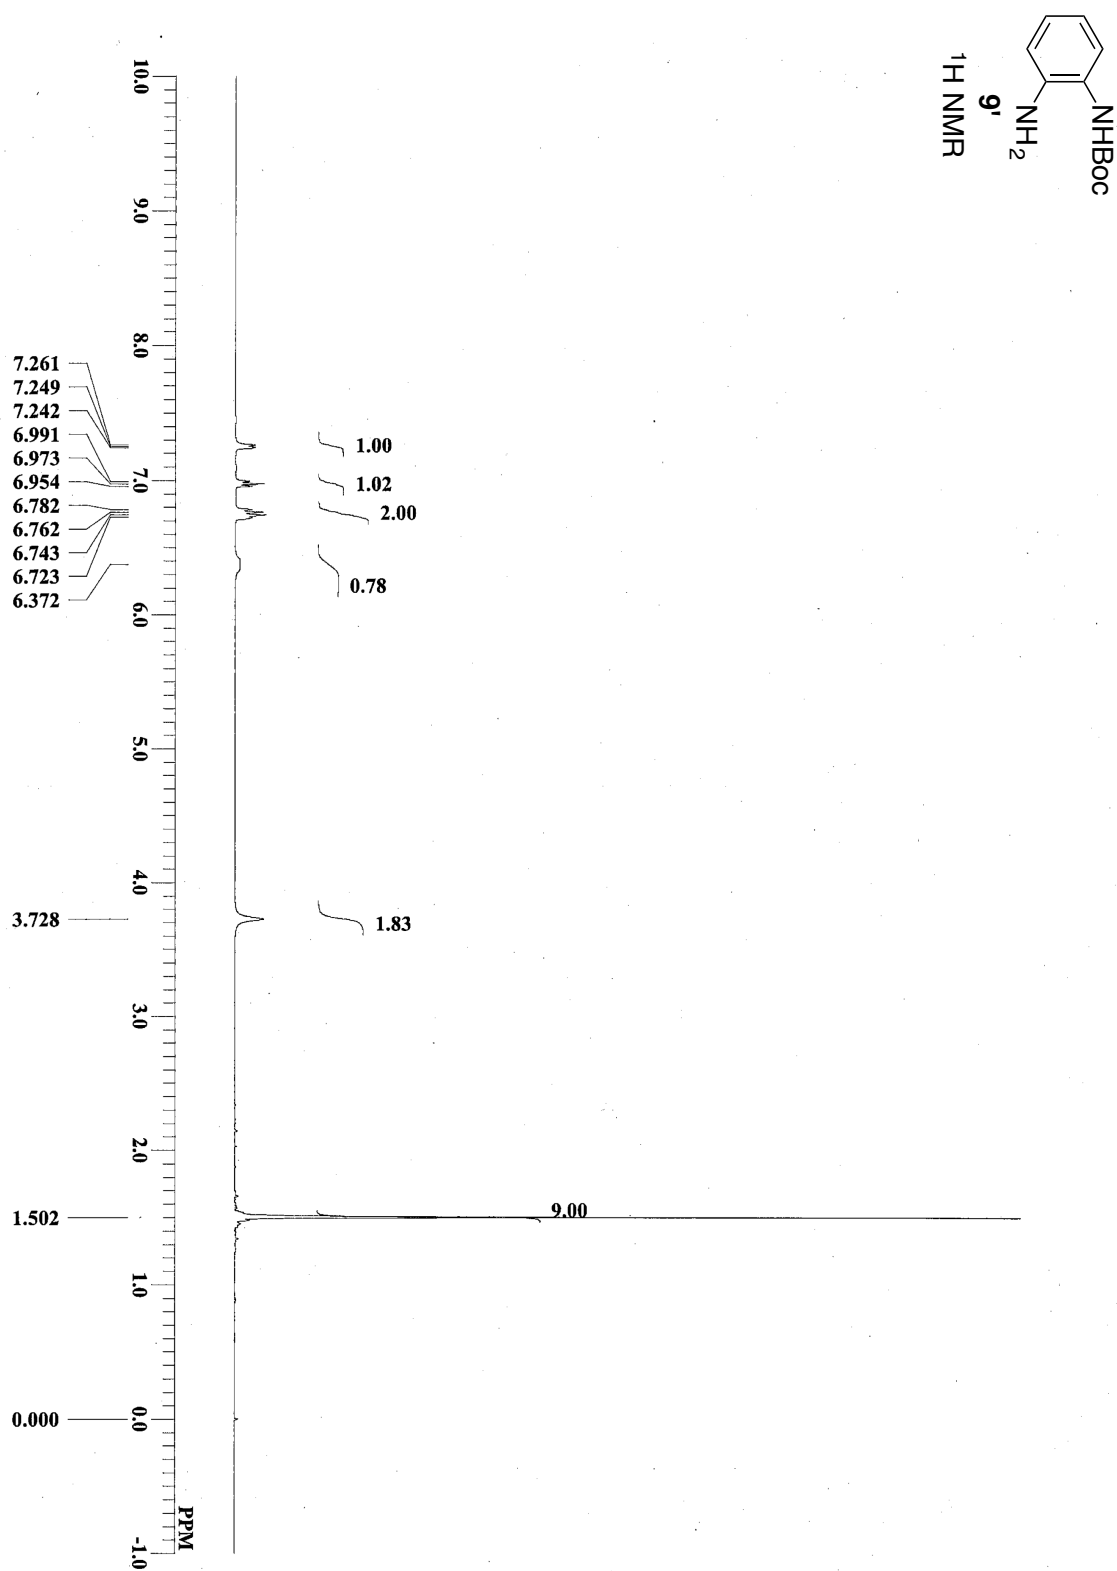

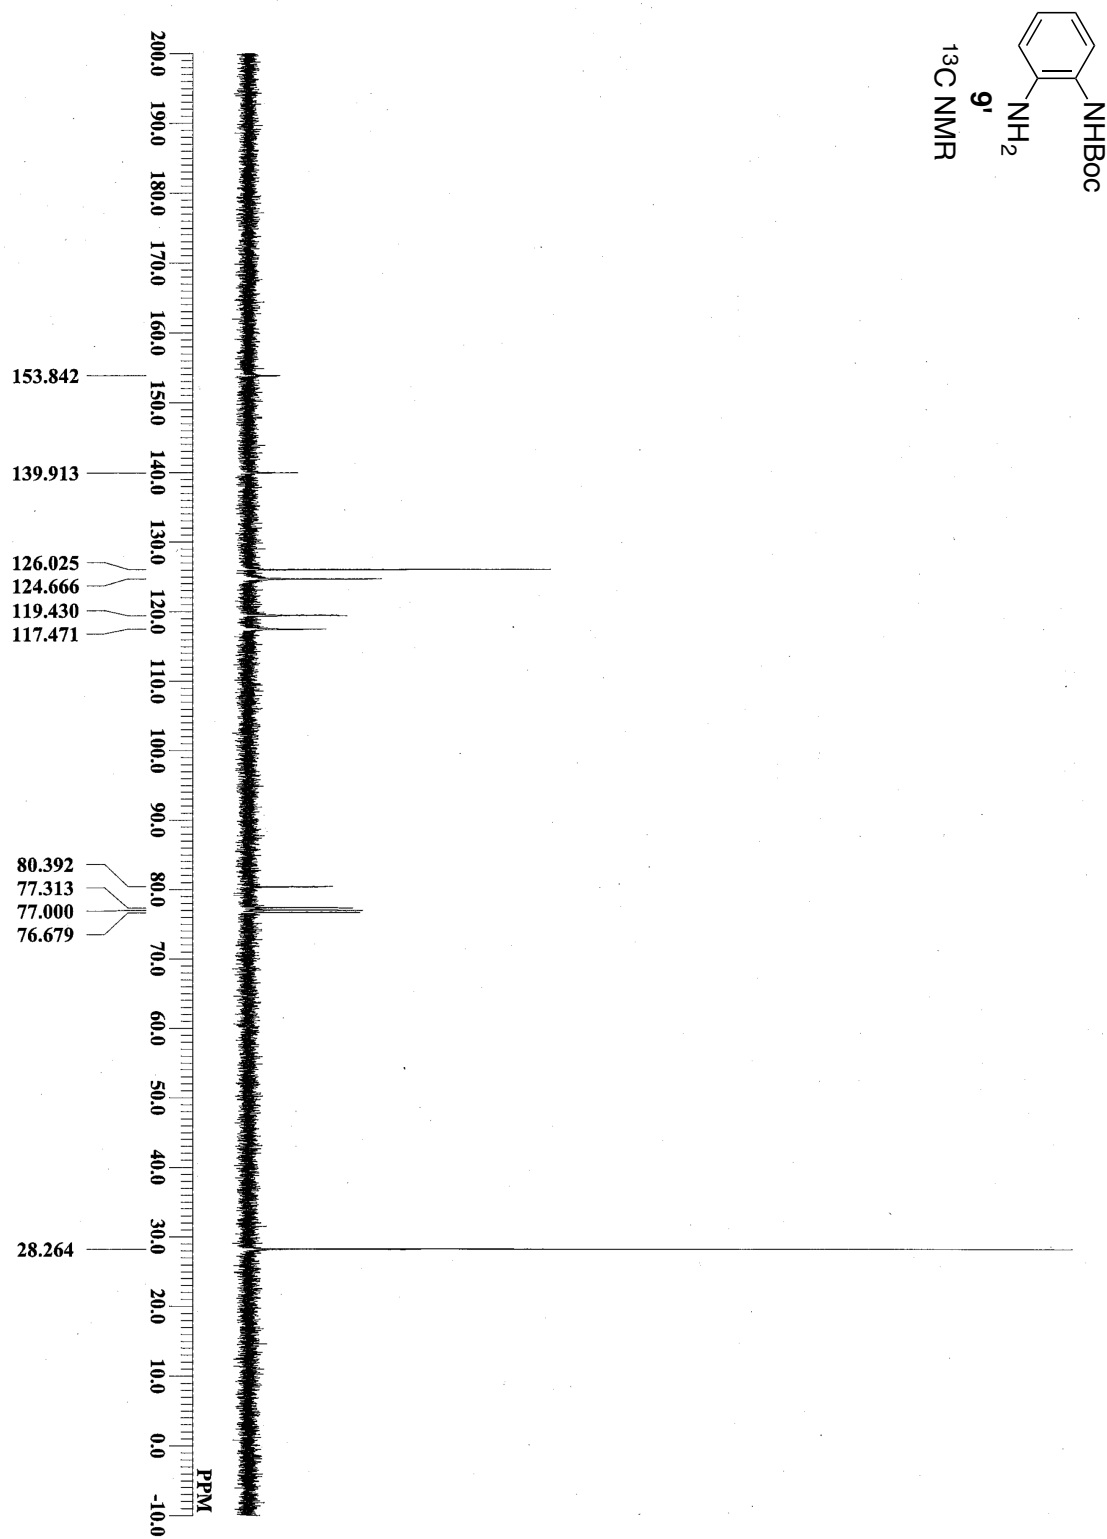

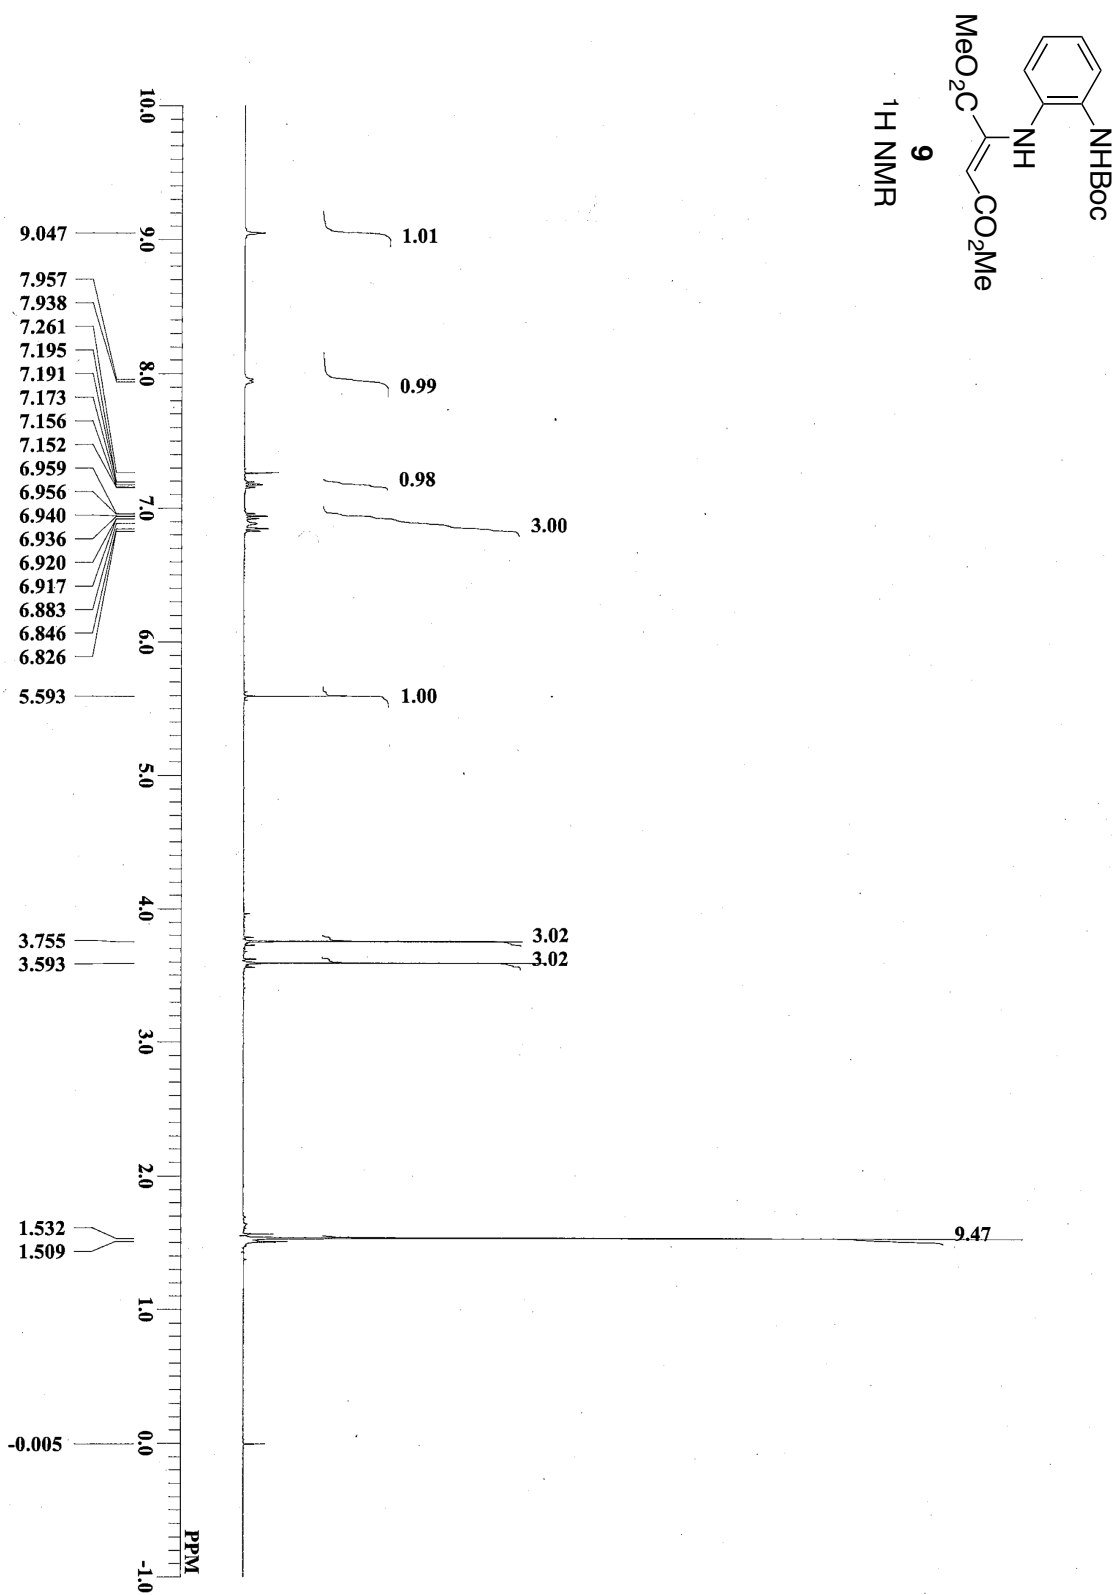

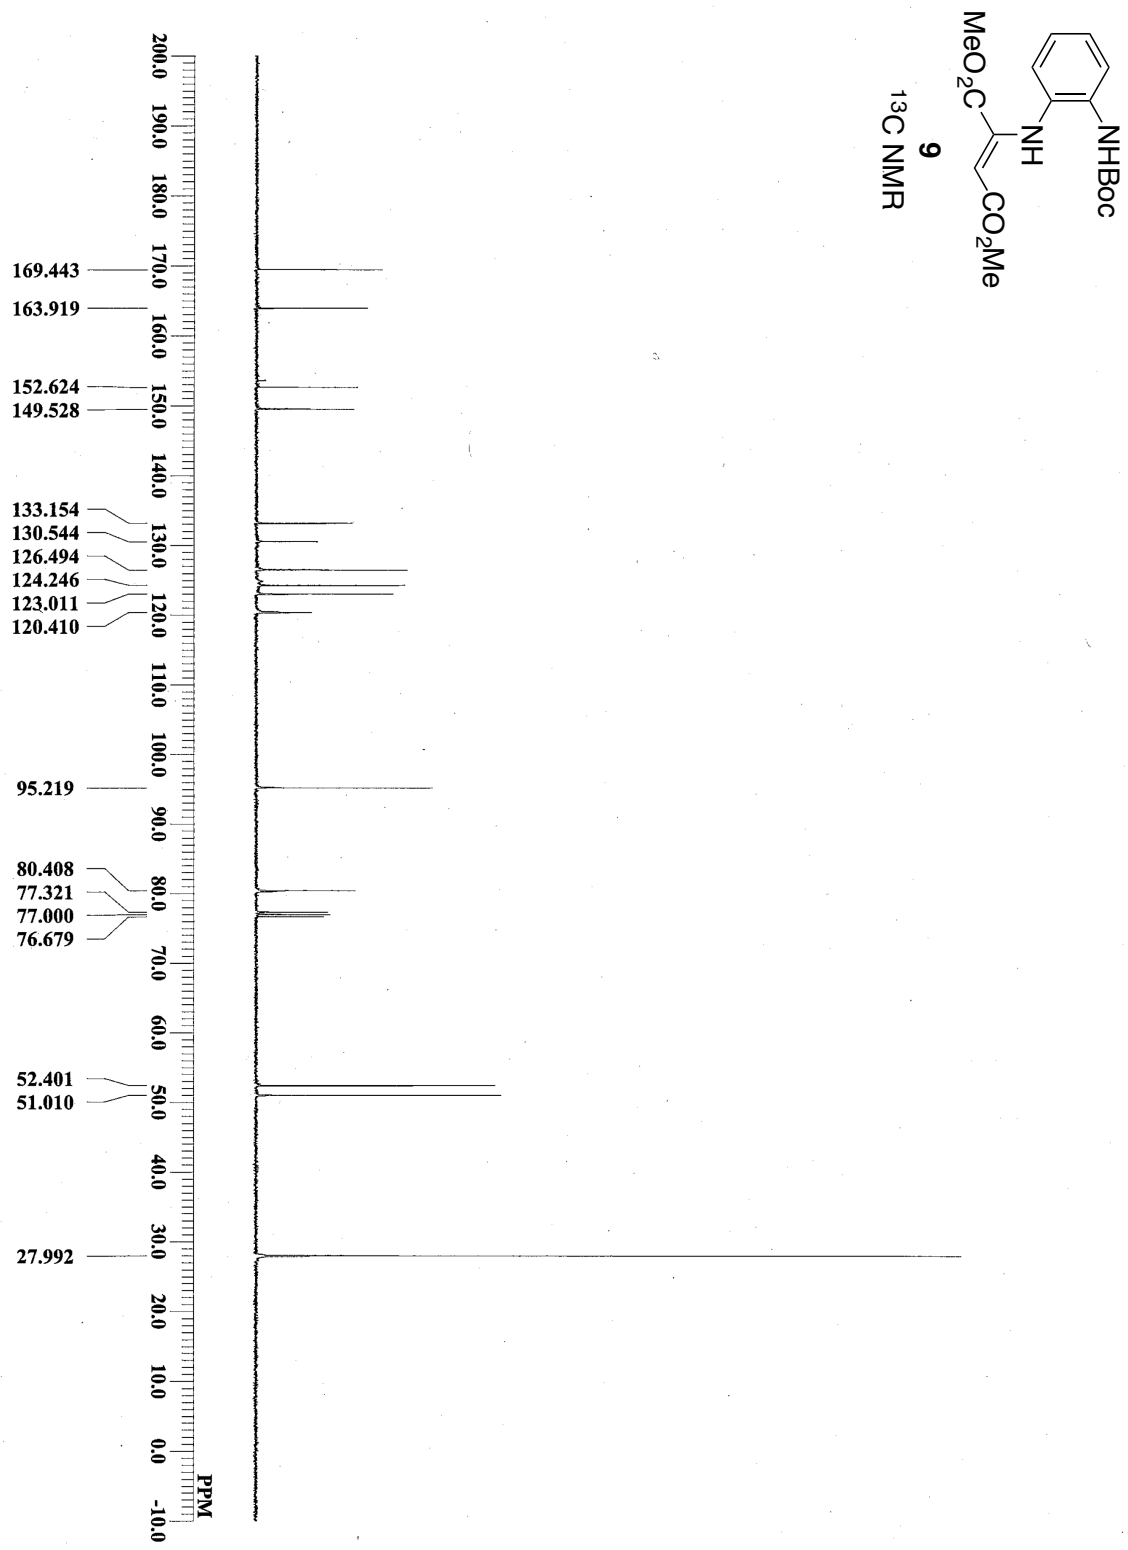

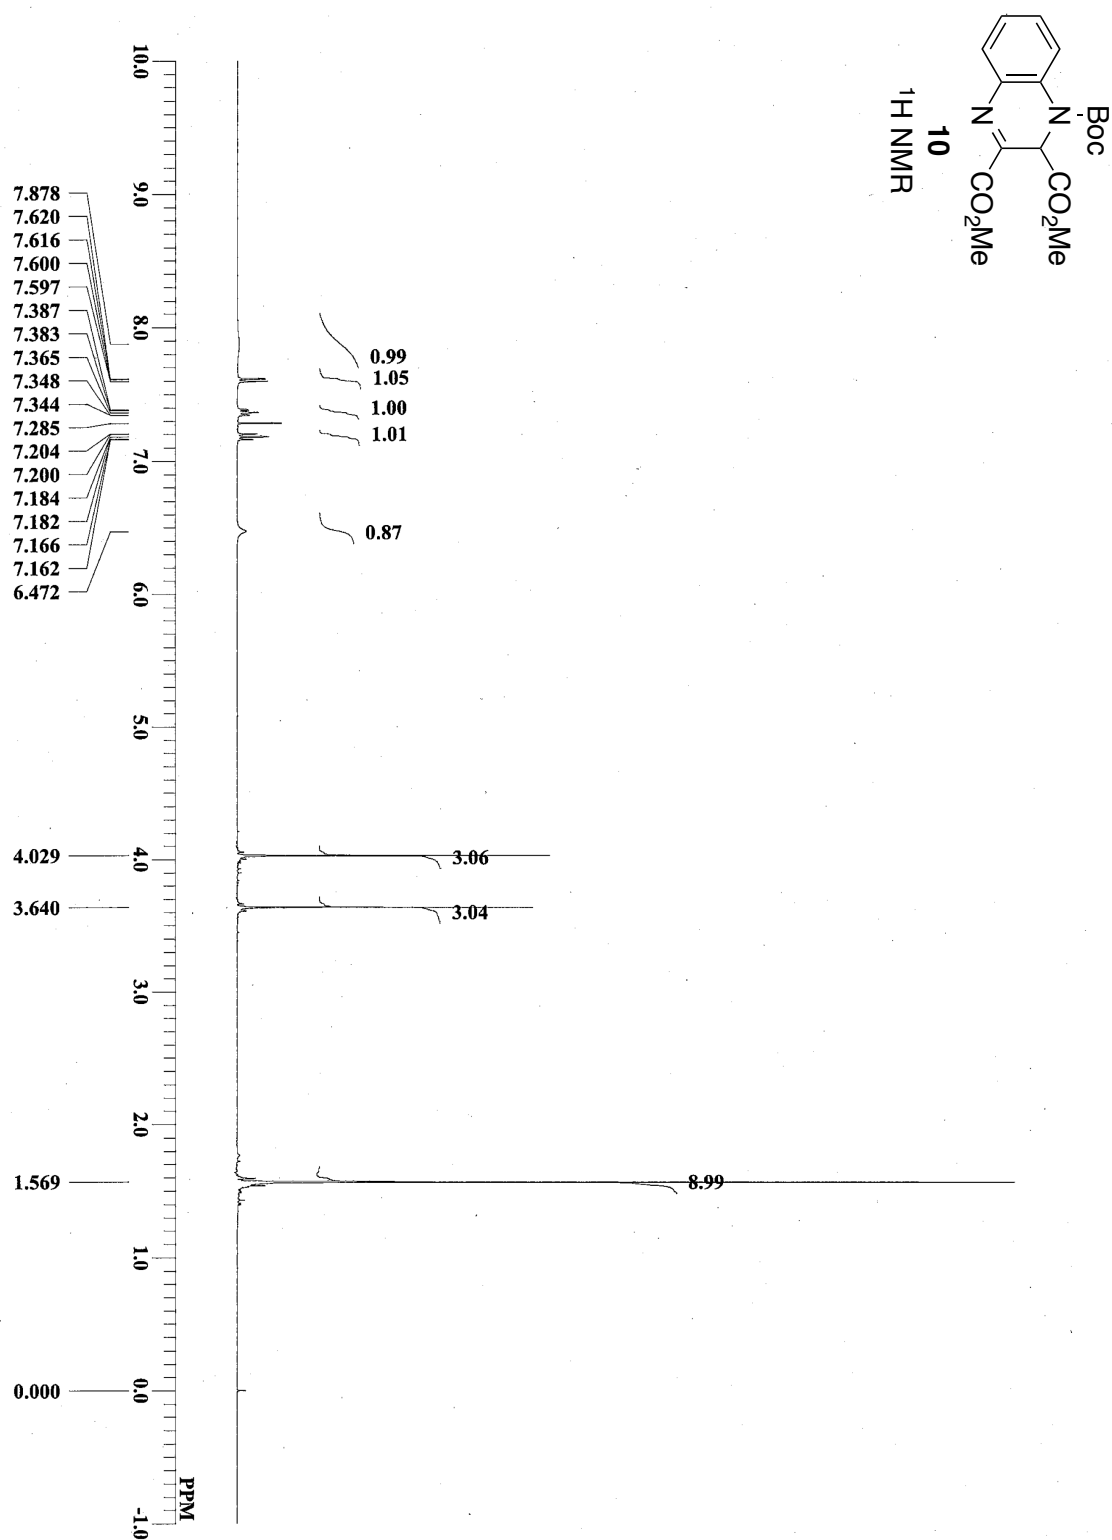

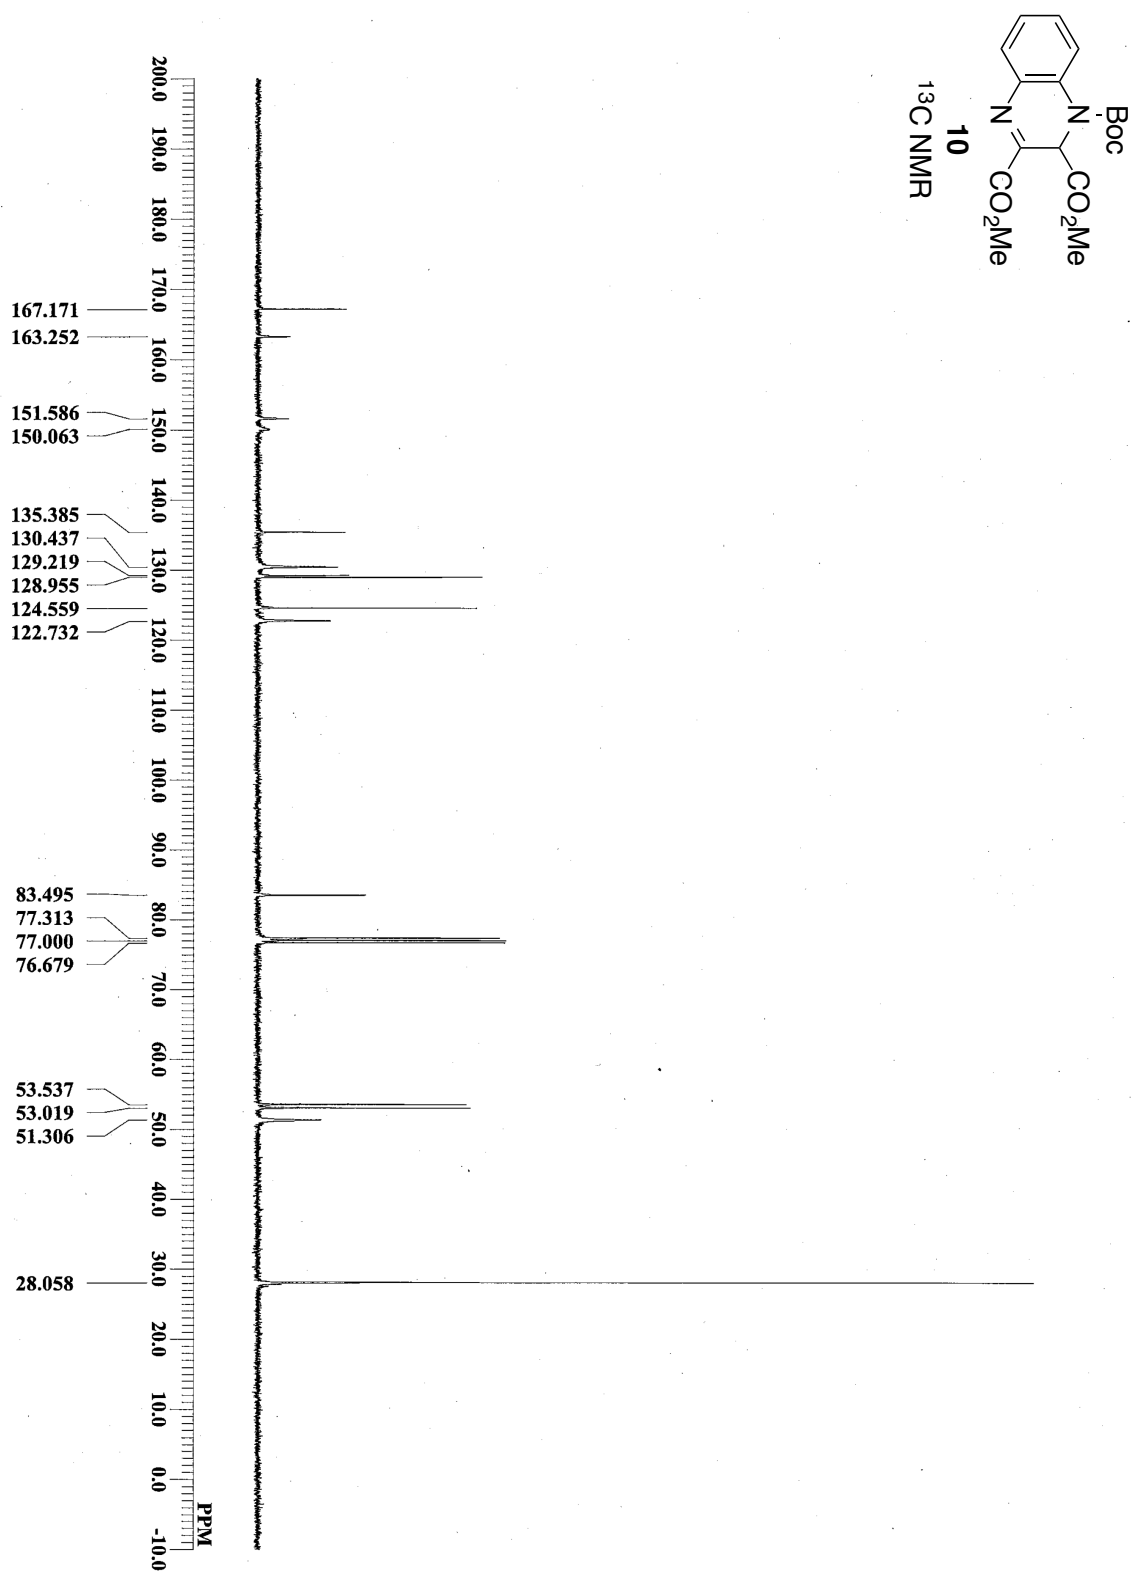

## References

- S1 Sultan, N.; Thomas, C.; Blanco, L.; Deloisy, S.; *Tetrahedron Lett.* **2011**, 52, 3443.
- S2 Sobhani, S.; Aryanejad, S.; Maleki, M. F. *Synlett* **2011**, 319.
- S3 Trost, B. M.; Massiot, G. S. *J. Am. Chem. Soc.* **1977**, 99, 4405.
- S4 Chandanshive, J. Z.; Bonini, B. F.; Gentili, D.; Fochi, M.; Bernardi, L.; Franchini, M. C. *Eur. J. Org. Chem.* **2010**, 6440.
- S5 Wong, J. C.; Tang, G.; Wu, X.; Liang, C.; Zhang, Z.; Guo, L.; Peng, Z.; Zhang, W.; Lin, X.; Wang, Z.; Mei, J.; Chen, J.; Pan, S.; Zhang, N.; Liu, Y.; Zhou, M.; Feng, L.; Zhao, W.; Li, S.; Zhang, C.; Zhang, M.; Rong, Y.; Jin, T.-G.; Zhang, X.; Ren, S.; Ji, Y.; Zhao, R.; She, J.; Ren, Y.; Xu, C.; Chen, D.; Cai, J.; Shan, S.; Pan, D.; Ning, Z.; Lu, X.; Chen, T.; He, Y.; Chen, L. *J. Med. Chem.* **2012**, 55, 8903.
- S6 Choudhary, G.; Peddinti, R. K. *Green Chem.* **2011**, 13, 3290.
- S7 Pinho e Melo, T. M. V. D.; Lopes, C. S. J.; Rocha Gonsalves, A. M. d'A.; Beja, A. M.; Paixão, J. A.; Silva, M. R.; Alte da Veiga, L. *J. Org. Chem.* **2002**, 67, 66.
- S8 Gilli, P.; Bertolasi, V.; Ferretti, V.; Gilli, G. *J. Am. Chem. Soc.* **2000**, 122, 10405.
- S9 Gamble, A. B.; Keller, P. A. *Chem. Commun.* **2010**, 46, 4076.
